# Supplementary material
Source: PubMed Central journal article supplement (PMC2785267)
Supplement: 0904742106_ST2_PDF.pdf [file 0904742106_ST2_PDF.pdf]

Table S2

A. *Hel1\_105* elements with fragments of a gene encoding a phosphatase-like protein

| <i>Helitron</i> * | 5' end<br>%<br>identity | 3' end<br>%<br>identity | Accession                  | Begin  | End    | Size,<br>bp | Orient. | Chromos. |
|-------------------|-------------------------|-------------------------|----------------------------|--------|--------|-------------|---------|----------|
| <i>Hel1_105a</i>  |                         |                         | <a href="#">AC195884.3</a> | 174713 | 176329 | 1617        | F       | 1        |
|                   | 98%                     |                         |                            |        |        |             |         |          |
| <i>Hel1_105b</i>  | 100                     | 98                      | <a href="#">AC206916.1</a> | 63875  | 62261  | 1615        | RC      | 1        |
| <i>Hel1_105c</i>  | 100                     | 100                     | <a href="#">AC204401.2</a> | 44985  | 46576  | 1592        | F       | 6        |
| <i>Hel1_105d</i>  | 100                     | 96                      | <a href="#">AC186310.4</a> | 59328  | 60836  | 1509        | F       | 4        |
|                   | 97%                     |                         |                            |        |        |             |         |          |
| <i>Hel1_105e</i>  | 100                     | 100                     | <a href="#">AC213049.1</a> | 35106  | 36796  | 1691        | F       | UNK      |
| <i>Hel1_105f</i>  | 100                     | 98                      | <a href="#">AC190811.1</a> | 76478  | 74800  | 1679        | RC      | 2        |
| <i>Hel1_105g</i>  | 100                     | 98                      | <a href="#">AC190928.1</a> | 83404  | 85076  | 1673        | F       | 2        |
| <i>Hel1_105h</i>  | 100                     | 100                     | <a href="#">AC196198.2</a> | 9962   | 8344   | 1619        | RC      | 8        |
| <i>Hel1_105i</i>  | 95                      | 98                      | <a href="#">AC190717.2</a> | 85199  | 83582  | 1618        | RC      | 3        |
| <i>Hel1_105j</i>  | 100                     | 98                      | <a href="#">AC206874.1</a> | 141595 | 143211 | 1617        | F       | 5        |
| <i>Hel1_105k</i>  | 100                     | 98                      | <a href="#">AC194851.3</a> | 137007 | 135393 | 1615        | RC      | 1        |
| <i>Hel1_105l</i>  | 100                     | 100                     | <a href="#">AC186621.4</a> | 163261 | 164875 | 1615        | F       | 1        |
| <i>Hel1_105m</i>  | 100                     | 96                      | <a href="#">AC196425.3</a> | 108629 | 110242 | 1614        | F       | 2        |
| <i>Hel1_105n</i>  | 100                     | 96                      | <a href="#">AC205078.2</a> | 80186  | 78573  | 1614        | RC      | 2        |
| <i>Hel1_105o</i>  | 100                     | 96                      | <a href="#">AC204592.1</a> | 155393 | 157006 | 1614        | F       | UNK      |
| <i>Hel1_105p</i>  | 95                      | 100                     | <a href="#">AC187547.4</a> | 121761 | 123374 | 1614        | F       | 6        |
| <i>Hel1_105q</i>  | 95                      | 98                      | <a href="#">AC194465.3</a> | 120395 | 122007 | 1613        | F       | 9        |
| <i>Hel1_105r</i>  | 100                     | 98                      | <a href="#">AC206601.1</a> | 54069  | 55680  | 1612        | F       | 2        |
| <i>Hel1_105s</i>  | 85                      | 98                      | <a href="#">AC204045.2</a> | 17196  | 18806  | 1611        | F       | 10       |
| <i>Hel1_105t</i>  | 95                      | 100                     | <a href="#">AC203841.2</a> | 88607  | 90212  | 1606        | F       | 10       |
| <i>Hel1_105u</i>  | 100                     | 96                      | <a href="#">AC206158.1</a> | 37855  | 39443  | 1589        | F       | UNK      |
| <i>Hel1_105v</i>  | 100                     | 100                     | <a href="#">AC208110.1</a> | 64618  | 63030  | 1589        | RC      | 10       |
| <i>Hel1_105w</i>  | 100                     | 100                     | <a href="#">AC194851.3</a> | 130076 | 128490 | 1587        | RC      | 1        |
| <i>Hel1_105x</i>  | 100                     | 98                      |                            | 66221  | 67805  | 1585        | F       | 4        |

|                   |     |     |                            |        |        |      |    |     |
|-------------------|-----|-----|----------------------------|--------|--------|------|----|-----|
|                   |     |     | <a href="#">AC193412.3</a> |        |        |      |    |     |
| <i>Hel1_105y</i>  | 95  | 98  | <a href="#">AC213041.1</a> | 7947   | 6365   | 1583 | RC | 1   |
| <i>Hel1_105z</i>  | 100 | 100 | <a href="#">AC199796.2</a> | 63093  | 64673  | 1581 | F  | 8   |
| <i>Hel1_105a2</i> | 100 | 100 | <a href="#">AC199193.2</a> | 103246 | 101673 | 1574 | RC | UNK |
| <i>Hel1_105b2</i> | 100 | 100 | <a href="#">AC208076.1</a> | 160018 | 158452 | 1567 | RC | 6   |
| <i>Hel1_105c2</i> | 100 | 96  | <a href="#">AC206265.1</a> | 110553 | 112114 | 1562 | F  | 9   |
| <i>Hel1_105d2</i> | 100 | 100 | <a href="#">AC198598.3</a> | 21148  | 19620  | 1529 | RC | 7   |
| <i>Hel1_105e2</i> | 95  | 98  | <a href="#">AC198136.2</a> | 85194  | 86712  | 1519 | F  | 3   |
| <i>Hel1_105f2</i> | 100 | 100 | <a href="#">AC213395.1</a> | 114686 | 116197 | 1512 | F  | 5   |
| <i>Hel1_105g2</i> | 100 | 100 | <a href="#">AC199802.2</a> | 138981 | 137499 | 1483 | RC | 4   |
|                   | 96% |     | -                          |        |        |      |    |     |
| <i>Hel1_105h2</i> | 100 | 100 | <a href="#">AC200479.3</a> | 72973  | 71230  | 1744 | RC | 6   |
| <i>Hel1_105i2</i> | 100 | 100 | <a href="#">AC194077.3</a> | 92466  | 90810  | 1657 | RC | 6   |
| <i>Hel1_105j2</i> | 95  | 92  | <a href="#">AC194210.2</a> | 31865  | 33486  | 1622 | F  | 6   |
| <i>Hel1_105k2</i> | 95  | 100 | <a href="#">AC203428.2</a> | 126962 | 128579 | 1618 | F  | 3   |
| <i>Hel1_105l2</i> | 100 | 96  | <a href="#">AC198603.2</a> | 162426 | 164039 | 1614 | F  | 7   |
| <i>Hel1_105m2</i> | 100 | 100 | <a href="#">AC211541.1</a> | 114360 | 115973 | 1614 | F  | 2   |
| <i>Hel1_105n2</i> | 100 | 100 | <a href="#">AC199954.3</a> | 77980  | 76375  | 1606 | RC | 8   |
| <i>Hel1_105o2</i> | 100 | 98  | <a href="#">AC211006.1</a> | 122688 | 124221 | 1534 | F  | 8   |
|                   | 95% |     |                            |        |        |      |    |     |
| <i>Hel1_105p2</i> | 90  | 98  | <a href="#">AC149309.3</a> | 25058  | 26756  | 1699 | F  | 9   |
| <i>Hel1_105q2</i> | 95  | 98  | <a href="#">AC199087.3</a> | 133932 | 135566 | 1635 | F  | 8   |
| <i>Hel1_105r2</i> | 100 | 98  | <a href="#">AC194306.3</a> | 106142 | 104533 | 1610 | RC | 4   |
|                   | 94% |     |                            |        |        |      |    |     |
| <i>Hel1_105s2</i> | 100 | 100 | <a href="#">AC212026.1</a> | 52035  | 53643  | 1609 | F  | 6   |
| <i>Hel1_105t2</i> | 95  | 100 | <a href="#">AC196025.3</a> | 114090 | 115702 | 1613 | F  | 5   |
|                   | 93% |     |                            |        |        |      |    |     |
| <i>Hel1_105u2</i> | 95  | 98  | <a href="#">AC194455.3</a> | 35676  | 34189  | 1488 | RC | 8   |
|                   | 91% |     |                            |        |        |      |    |     |
| <i>Hel1_105v2</i> | 90  | 96  | <a href="#">AC190894.3</a> | 58588  | 60189  | 1602 | F  | 1   |
|                   | 90% |     |                            |        |        |      |    |     |

|                   |     |    |                            |        |        |      |    |     |
|-------------------|-----|----|----------------------------|--------|--------|------|----|-----|
| <i>Hel1_105w2</i> | 100 | 96 | <a href="#">AC165176.2</a> | 138201 | 145022 | 6822 | F  |     |
| <i>Hel1_105x2</i> | 90  | 92 | <a href="#">AC203980.2</a> | 165926 | 164285 | 1642 | RC | UNK |
| <i>Hel1_105y2</i> | 90  | 98 | <a href="#">AC202408.2</a> | 40585  | 42206  | 1622 | F  | 3   |
| <i>Hel1_105z2</i> | 90  | 98 | <a href="#">AC202878.2</a> | 99572  | 101195 | 1624 | F  | 4   |
| <i>Hel1_105a3</i> | 95  | 98 | <a href="#">AC202878.2</a> | 99277  | 101195 | 1919 | F  | 4   |
| 89%               |     |    |                            |        |        |      |    |     |
| <i>Hel1_105b3</i> | 90  | 94 | <a href="#">AC193593.2</a> | 97477  | 95841  | 1637 | RC | 9   |
| <i>Hel1_105c3</i> | 95  | 86 | <a href="#">AC211333.1</a> | 81250  | 82880  | 1631 | F  | 6   |
| <i>Hel1_105d3</i> | 90  | 96 | <a href="#">AC195330.3</a> | 26270  | 27890  | 1621 | F  | 2   |
| 88%               |     |    |                            |        |        |      |    |     |
| <i>Hel1_105e3</i> | 90  | 90 | <a href="#">AC211959.1</a> | 101598 | 103224 | 1627 | F  | 4   |
| <i>Hel1_105f3</i> | 90  | 94 | <a href="#">AC196776.2</a> | 129200 | 130818 | 1619 | F  | 10  |
| 87%               |     |    |                            |        |        |      |    |     |
| <i>Hel1_105g3</i> | 95  | 98 | <a href="#">AC188033.2</a> | 20020  | 16167  | 3854 | RC | 10  |
| <i>Hel1_105h3</i> | 90  | 90 | <a href="#">AC213040.1</a> | 132295 | 130663 | 1633 | RC | 5   |
| <i>Hel1_105i3</i> | 90  | 92 | <a href="#">AC205081.2</a> | 128538 | 130163 | 1626 | F  | UNK |
| <i>Hel1_105j3</i> | 85  | 92 | <a href="#">AC198384.2</a> | 133581 | 131948 | 1634 | RC | 2   |
| <i>Hel1_105k3</i> | 85  | 92 | <a href="#">AC208020.1</a> | 105130 | 106744 | 1615 | F  | 1   |
| 86%               |     |    |                            |        |        |      |    |     |
| <i>Hel1_105l3</i> | 95  | 84 | <a href="#">AC212470.1</a> | 59120  | 57474  | 1647 | RC | UNK |
| <i>Hel1_105m3</i> | 95  | 88 | <a href="#">AC149308.3</a> | 45471  | 47086  | 1616 | F  | 9   |
| <i>Hel1_105n3</i> | 95  | 88 | <a href="#">AC192175.2</a> | 92672  | 91058  | 1615 | RC | 9   |
| <i>Hel1_105o3</i> | 61  | 88 | <a href="#">AC184707.3</a> | 145216 | 143576 | 1641 | RC | 4   |
| 85%               |     |    |                            |        |        |      |    |     |
| <i>Hel1_105p3</i> | 80  | 96 | <a href="#">AC177834.4</a> | 158763 | 161815 | 3053 | F  | 2   |
| 84%               |     |    |                            |        |        |      |    |     |
| <i>Hel1_105q3</i> | 90  | 90 | <a href="#">AC204269.2</a> | 152395 | 154017 | 1623 | F  | 4   |
| <i>Hel1_105r3</i> | 90  | 90 | <a href="#">AC211193.1</a> | 105399 | 107021 | 1623 | F  | 4   |
| 82%               |     |    |                            |        |        |      |    |     |
| <i>Hel1_105s3</i> | 90  | 82 | <a href="#">AC185487.4</a> | 3780   | 5239   | 1460 | F  | 5   |
| 81%               |     |    |                            |        |        |      |    |     |
| <i>Hel1_105t3</i> | 95  | 84 |                            | 64741  | 66256  | 1516 | F  | 2   |

|                   |     |     |                            |        |        |       |   |    |
|-------------------|-----|-----|----------------------------|--------|--------|-------|---|----|
|                   |     |     | <a href="#">AC209752.1</a> |        |        |       |   |    |
| <i>Hel1_105u3</i> | 95  | 88  | <a href="#">AC194430.3</a> | 143018 | 144556 | 1539  | F | 10 |
| 80%               |     |     |                            |        |        |       |   |    |
| <i>Hel1_105v3</i> | 90  | 84  | <a href="#">AC205536.1</a> | 23208  | 24743  | 1536  | F | 4  |
| 78%               |     |     |                            |        |        |       |   |    |
| <i>Hel1_105w3</i> | 95  | 94  | <a href="#">AC192175.2</a> | 149143 | 150606 | 1464  | F | 9  |
| <i>Hel1_105x3</i> | 100 | 100 | <a href="#">AC213878.1</a> | 130973 | 133029 | 2057  | F | 4  |
| 71%               |     |     |                            |        |        |       |   |    |
| <i>Hel1_105y3</i> | 100 | 100 | <a href="#">AC197055.3</a> | 12301  | 22758  | 10458 | F | 3  |
| <i>Hel1_105z3</i> | 85  | 78  | <a href="#">AC197011.3</a> | 59820  | 62420  | 2601  | F | 9  |
| 69%               |     |     |                            |        |        |       |   |    |
| <i>Hel1_105a4</i> | 100 | 100 | <a href="#">AC194145.2</a> | 143592 | 146105 | 2514  | F | 1  |

\* Percentages above each entry refer to % identity relative to *Hel1\_105a*

| <b>B. <i>Hel1_106</i> elements with fragments of a <i>Cellulose Synthase-1</i> gene</b> |                   |                   |                            |        |        |          |         |          |
|-----------------------------------------------------------------------------------------|-------------------|-------------------|----------------------------|--------|--------|----------|---------|----------|
| <i>Helitron</i> *                                                                       | 5' end % identity | 3' end % identity | Accession                  | Begin  | End    | Size, bp | Orient. | Chromos. |
| <i>Hel1_106a</i>                                                                        | 100               | 100               | <a href="#">AC190859.3</a> | 85168  | 89148  | 3981     | F       | 1        |
| 99%                                                                                     |                   |                   |                            |        |        |          |         |          |
| <i>Hel1_106b</i>                                                                        | 100               | 100               | <a href="#">AC191581.2</a> | 22968  | 26949  | 3982     | F       | 3        |
| 97%                                                                                     |                   |                   |                            |        |        |          |         |          |
| <i>Hel1_106c</i>                                                                        | 100               | 98                | <a href="#">AC200889.2</a> | 45706  | 49691  | 3986     | F       | 2        |
| <i>Hel1_106d</i>                                                                        | 100               | 98                | <a href="#">AC195921.2</a> | 90120  | 94118  | 3999     | F       | 7        |
| <i>Hel1_106e</i>                                                                        | 100               | 98                | <a href="#">AC188843.3</a> | 70068  | 74065  | 3998     | F       | 10       |
| <i>Hel1_106f</i>                                                                        | 100               | 94                | <a href="#">AC209217.1</a> | 131046 | 127050 | 3997     | RC      | 4        |
| <i>Hel1_106g</i>                                                                        | 95                | 98                | <a href="#">AC203793.2</a> | 106421 | 102421 | 4001     | RC      | 6        |
| <i>Hel1_106h</i>                                                                        | 95                | 96                | <a href="#">AC198412.3</a> | 142362 | 146364 | 4003     | F       | 1        |
| 96%                                                                                     |                   |                   |                            |        |        |          |         |          |
| <i>Hel1_106i</i>                                                                        | 95                | 96                | <a href="#">AC202430.2</a> | 176635 | 172642 | 3994     | RC      | 6        |
| <i>Hel1_106j</i>                                                                        | 100               | 92                | <a href="#">AC203808.2</a> | 56966  | 60961  | 3996     | F       | 5        |
| <i>Hel1_106k</i>                                                                        | 100               | 94                | <a href="#">AC186009.3</a> | 54055  | 58045  | 3991     | F       | 1        |
| <i>Hel1_106l</i>                                                                        | 100               | 96                | <a href="#">AC200302.3</a> | 142989 | 146970 | 3982     | F       | 3        |
| <i>Hel1_106m</i>                                                                        | 100               | 96                | <a href="#">AC191799.3</a> | 17668  | 21638  | 3971     | F       | 2        |
| <i>Hel1_106n</i>                                                                        | 57                | 86                | <a href="#">AC199959.3</a> | 18666  | 22636  | 3971     | F       | 9        |
| <i>Hel1_106o</i>                                                                        | 100               | 94                | <a href="#">AC209374.1</a> | 100104 | 96071  | 4034     | RC      | 5        |
| 94%                                                                                     |                   |                   |                            |        |        |          |         |          |
| <i>Hel1_106p</i>                                                                        | 100               | 98                | <a href="#">AC197275.3</a> | 5621   | 1478   | 4144     | RC      | 10       |
| 93%                                                                                     |                   |                   |                            |        |        |          |         |          |
| <i>Hel1_106q</i>                                                                        | 100               | 96                | <a href="#">AC211737.1</a> | 145351 | 149430 | 4080     | F       | 5        |
| 91%                                                                                     |                   |                   |                            |        |        |          |         |          |
| <i>Hel1_106r</i>                                                                        | 100               | 96                | <a href="#">AC206954.2</a> | 13818  | 6302   | 7517     | RC      | 10       |

|                  |     |     |    |                            |        |        |       |    |   |
|------------------|-----|-----|----|----------------------------|--------|--------|-------|----|---|
| <i>Hel1_106s</i> | 89% | 100 | 98 | <a href="#">AC195585.3</a> | 119457 | 158735 | 39279 | F  | 5 |
| <i>Hel1_106t</i> |     | 100 | 98 | <a href="#">AC205064.2</a> | 88979  | 95582  | 6604  | F  | 4 |
| <i>Hel1_106u</i> | 77% | 95  | 86 | <a href="#">AC185121.2</a> | 123383 | 136090 | 12708 | F  | 4 |
| <i>Hel1_106v</i> | 75% | 100 | 94 | <a href="#">AC200886.3</a> | 69164  | 62540  | 6625  | RC | 4 |
| <i>Hel1_106w</i> | 67% | 100 | 98 | <a href="#">AC190897.3</a> | 91082  | 97807  | 6726  | F  | 4 |
| <i>Hel1_106x</i> | 62% | 100 | 96 | <a href="#">AC189076.3</a> | 84866  | 105892 | 21027 | F  | 1 |
| <i>Hel1_106y</i> | 54% | 100 | 96 | <a href="#">AC203234.2</a> | 103167 | 121321 | 18155 | F  | 8 |
| <i>Hel1_106z</i> | 51% | 95  | 98 | <a href="#">AC208109.1</a> | 72568  | 52181  | 20388 | RC | 7 |

\* Percentages above each entry refer to % identity relative to *Hel1\_106a*
