# Supplementary material
Source: PubMed Central journal article supplement (PMC2785267)
Supplement: 0904742106_ST3_PDF.pdf [file 0904742106_ST3_PDF.pdf]

**Table S3****A. Helitrons of the Hel1\_105 subfamily containing fragments from a gene encoding a phosphatase-like protein**

| <b>Accession</b> | <b>Chromosome</b> | <b>BAC clone</b> | <b>Score</b> | <b>E-value</b> |
|------------------|-------------------|------------------|--------------|----------------|
| AC195884.3       | 1                 | CH201-268C14     | 2917         | 0              |
| AC206916.3       | 1                 | ZMMBBb-381L5     | 2737         | 0              |
| AC193961.3       | 1                 | CH201-215N19     | 2715         | 0              |
| AC194851.3       | 1                 | CH201-25A10      | 2704         | 0              |
| AC211577.3       | 1                 | CH201-361I14     | 2688         | 0              |
| AC201898.4       | 1                 | CH201-322F10     | 2650         | 0              |
| AC213041.3       | 1                 | CH201-497D22     | 2603         | 0              |
| AC209758.1       | 1                 | CH201-107E10     | 2562         | 0              |
| AC233856.1       | 1                 | CH201-154A9      | 2495         | 0              |
| AC186657.3       | 1                 | CH201-60A13      | 2387         | 0              |
| AC195687.3       | 1                 | CH201-389P22     | 2309         | 0              |
| AC205149.3       | 1                 | CH201-189F2      | 2161         | 0              |
| AC211460.3       | 1                 | CH201-136I11     | 2159         | 0              |
| AC196711.3       | 1                 | CH201-460F16     | 2154         | 0              |
| AC202939.3       | 1                 | CH201-317J13     | 2140         | 0              |
| AC215269.3       | 1                 | CH201-155M10     | 2134         | 0              |
| AC177887.2       | 1                 | CH201-212D7      | 2129         | 0              |
| AC186332.3       | 1                 | CH201-166K22     | 2127         | 0              |
| AC210812.5       | 1                 | CH201-317A14     | 2122         | 0              |
| AC190912.2       | 1                 | CH201-32K11      | 2114         | 0              |
| AC196289.2       | 1                 | ZMMBBb-265F18    | 2082         | 0              |
| AC209165.3       | 1                 | CH201-422D18     | 2080         | 0              |
| AC197545.3       | 1                 | CH201-392G3      | 2064         | 0              |
| AC217684.3       | 1                 | CH201-521P12     | 2049         | 0              |
| AC209762.3       | 1                 | CH201-263N21     | 2035         | 0              |
| AC192204.3       | 1                 | CH201-338P5      | 2026         | 0              |
| AC185613.4       | 1                 | ZMMBBb-130F12    | 2022         | 0              |
| AC194183.3       | 1                 | CH201-324L14     | 1984         | 0              |
| AC209821.3       | 1                 | CH201-81L15      | 1983         | 0              |
| AC185590.3       | 1                 | ZMMBBb-526E10    | 1977         | 0              |
| AC208666.3       | 1                 | CH201-436J18     | 1961         | 0              |
| AC194407.3       | 1                 | CH201-184C11     | 1959         | 0              |
| AC191311.3       | 1                 | CH201-3A1        | 1957         | 0              |
| AC233892.1       | 1                 | CH201-547G17     | 1925         | 0              |
| AC187481.4       | 1                 | ZMMBBb-230J4     | 1923         | 0              |
| AC199770.4       | 1                 | CH201-276H7      | 1916         | 0              |
| AC210968.5       | 1                 | CH201-289H15     | 1912         | 0              |
| AC194145.3       | 1                 | CH201-360C6      | 1907         | 0              |
| AC202134.4       | 1                 | CH201-102D2      | 1905         | 0              |
| AC199175.2       | 1                 | CH201-472J19     | 1903         | 0              |
| AC194470.3       | 1                 | CH201-118P12     | 1898         | 0              |
| AC217502.3       | 1                 | CH201-40B9       | 1894         | 0              |
| AC206825.3       | 1                 | CH201-45D1       | 1889         | 0              |
| AC211510.3       | 1                 | CH201-113A9      | 1880         | 0              |
| AC207378.3       | 1                 | ZMMBBb-397H6     | 1874         | 0              |
| AC214822.3       | 1                 | CH201-89G8       | 1873         | 0              |
| AC186430.4       | 1                 | CH201-286P24     | 1858         | 0              |
| AC206675.3       | 1                 | CH201-64A9       | 1844         | 0              |
| AC194612.2       | 1                 | CH201-113K11     | 1842         | 0              |

|            |   |               |      |   |
|------------|---|---------------|------|---|
| AC194473.3 | 1 | CH201-118E22  | 1837 | 0 |
| AC207114.3 | 1 | CH201-334D3   | 1831 | 0 |
| AC206862.3 | 1 | ZMMBBb-508B23 | 1819 | 0 |
| AC214527.3 | 1 | CH201-451G20  | 1792 | 0 |
| AC210311.3 | 1 | CH201-229L2   | 1766 | 0 |
| AC199953.4 | 1 | CH201-114I20  | 1764 | 0 |
| AC200055.3 | 1 | CH201-326F23  | 1763 | 0 |
| AC215303.3 | 1 | ZMMBBb-286H14 | 1759 | 0 |
| AC205771.3 | 1 | ZMMBBb-232F16 | 1750 | 0 |
| AC226534.2 | 1 | ZMMBBb-331H10 | 1746 | 0 |
| AC195160.3 | 1 | ZMMBBb-317B16 | 1745 | 0 |
| AC204879.3 | 1 | CH201-211I11  | 1727 | 0 |
| AC209030.3 | 1 | ZMMBBb-16K19  | 1723 | 0 |
| AC186318.4 | 1 | CH201-308I3   | 1719 | 0 |
| AC195853.3 | 1 | CH201-255E2   | 1705 | 0 |
| AC208665.3 | 1 | CH201-376H17  | 1701 | 0 |
| AC191108.3 | 1 | CH201-113D18  | 1698 | 0 |
| AC204681.3 | 1 | ZMMBBb-532F19 | 1665 | 0 |
| AC205498.3 | 1 | CH201-91J10   | 1658 | 0 |
| AC214290.3 | 1 | CH201-386A6   | 1654 | 0 |
| AC199850.4 | 1 | CH201-455F21  | 1636 | 0 |
| AC209841.3 | 1 | CH201-40G18   | 1635 | 0 |
| AC194091.3 | 1 | CH201-412P7   | 1633 | 0 |
| AC204578.3 | 1 | CH201-321M23  | 1631 | 0 |
| AC194868.3 | 1 | CH201-271I4   | 1629 | 0 |
| AC190624.3 | 1 | ZMMBBb-171I15 | 1627 | 0 |
| AC235547.1 | 1 | ZMMBBb-373I1  | 1626 | 0 |
| AC207535.3 | 1 | ZMMBBb-329E17 | 1624 | 0 |
| AC185612.3 | 1 | ZMMBBb-284F7  | 1620 | 0 |
| AC214772.3 | 1 | CH201-175G15  | 1618 | 0 |
| AC226312.2 | 1 | ZMMBBb-394M2  | 1615 | 0 |
| AC207468.4 | 1 | CH201-504K9   | 1609 | 0 |
| AC208644.3 | 1 | CH201-272B24  | 1608 | 0 |
| AC186602.4 | 1 | CH201-537L13  | 1606 | 0 |
| AC214818.2 | 1 | CH201-462F4   | 1602 | 0 |
| AC207262.3 | 1 | CH201-264L18  | 1600 | 0 |
| AC204538.4 | 1 | ZMMBBb-352K24 | 1597 | 0 |
| AC233935.1 | 1 | ZMMBBb-470H16 | 1595 | 0 |
| AC209815.3 | 1 | CH201-99H23   | 1593 | 0 |
| AC212396.4 | 1 | CH201-462P14  | 1591 | 0 |
| AC217300.3 | 1 | ZMMBBb-302L8  | 1588 | 0 |
| AC203085.3 | 1 | CH201-478C8   | 1586 | 0 |
| AC208339.3 | 1 | CH201-279L8   | 1582 | 0 |
| AC186335.4 | 1 | CH201-163D14  | 1581 | 0 |
| AC216806.3 | 1 | ZMMBBb-379C16 | 1579 | 0 |
| AC195881.3 | 1 | ZMMBBb-340C10 | 1577 | 0 |
| AC206957.2 | 1 | CH201-334G24  | 1575 | 0 |
| AC209845.4 | 1 | CH201-287B19  | 1570 | 0 |
| AC190550.3 | 1 | CH201-283K20  | 1568 | 0 |
| AC210717.3 | 1 | ZMMBBb-637N13 | 1566 | 0 |
| AC216009.3 | 1 | CH201-38H19   | 1561 | 0 |
| AC203319.4 | 1 | CH201-219M3   | 1555 | 0 |
| AC219153.3 | 1 | CH201-527J13  | 1553 | 0 |
| AC210190.3 | 1 | CH201-38B24   | 1550 | 0 |

|            |   |               |      |   |
|------------|---|---------------|------|---|
| AC215195.3 | 1 | CH201-169K13  | 1546 | 0 |
| AC212360.4 | 1 | CH201-51O22   | 1544 | 0 |
| AC194166.3 | 1 | CH201-256O11  | 1539 | 0 |
| AC193510.4 | 1 | ZMMBBb-444N8  | 1535 | 0 |
| AC191681.3 | 1 | CH201-9H16    | 1532 | 0 |
| AC202436.3 | 1 | CH201-78F9    | 1528 | 0 |
| AC208453.3 | 1 | CH201-319M18  | 1526 | 0 |
| AC203940.3 | 1 | ZMMBBb-566M15 | 1523 | 0 |
| AC214364.3 | 1 | CH201-16E1    | 1521 | 0 |
| AC191017.3 | 1 | CH201-125M18  | 1519 | 0 |
| AC211214.4 | 1 | CH201-11E23   | 1517 | 0 |
| AC229990.2 | 1 | ZMMBBb-314P12 | 1516 | 0 |
| AC194264.3 | 1 | CH201-28C24   | 1514 | 0 |
| AC212219.3 | 1 | CH201-315D23  | 1512 | 0 |
| AC196098.3 | 1 | CH201-314K2   | 1510 | 0 |
| AC212324.3 | 1 | CH201-111H10  | 1508 | 0 |
| AC200299.4 | 1 | CH201-418O21  | 1507 | 0 |
| AC210828.3 | 1 | CH201-455L14  | 1505 | 0 |
| AC199053.2 | 1 | ZMMBBb-166G15 | 1503 | 0 |
| AC217807.3 | 1 | ZMMBBb-335O19 | 1501 | 0 |
| AC207471.3 | 1 | CH201-336F17  | 1499 | 0 |
| AC200189.3 | 1 | ZMMBBb-224A21 | 1496 | 0 |
| AC203287.3 | 1 | CH201-496L16  | 1492 | 0 |
| AC194452.3 | 1 | CH201-140I5   | 1489 | 0 |
| AC212751.4 | 1 | CH201-477H20  | 1487 | 0 |
| AC204931.3 | 1 | ZMMBBb-581I14 | 1472 | 0 |
| AC216247.3 | 1 | CH201-270L19  | 1467 | 0 |
| AC231400.4 | 1 | CH201-428L6   | 1463 | 0 |
| AC209259.3 | 1 | CH201-498K3   | 1460 | 0 |
| AC205528.3 | 1 | CH201-116M1   | 1458 | 0 |
| AC202895.3 | 1 | CH201-528K9   | 1454 | 0 |
| AC200883.4 | 1 | CH201-236L20  | 1453 | 0 |
| AC205785.3 | 1 | ZMMBBb-368N4  | 1451 | 0 |
| AC204831.3 | 1 | ZMMBBb-437A15 | 1449 | 0 |
| AC204330.3 | 1 | CH201-114L3   | 1445 | 0 |
| AC208824.3 | 1 | CH201-101P23  | 1443 | 0 |
| AC207666.3 | 1 | CH201-452F15  | 1442 | 0 |
| AC208787.3 | 1 | CH201-114K19  | 1440 | 0 |
| AC212463.3 | 1 | CH201-423B6   | 1438 | 0 |
| AC207065.4 | 1 | CH201-546E22  | 1434 | 0 |
| AC196066.3 | 1 | CH201-395E15  | 1429 | 0 |
| AC194328.3 | 1 | ZMMBBb-385M16 | 1422 | 0 |
| AC205589.3 | 1 | ZMMBBb-87G20  | 1418 | 0 |
| AC216732.3 | 1 | CH201-20M22   | 1415 | 0 |
| AC196679.4 | 1 | CH201-455M15  | 1413 | 0 |
| AC186412.4 | 1 | CH201-477B16  | 1406 | 0 |
| AC225886.2 | 1 | CH201-105A16  | 1397 | 0 |
| AC214637.2 | 1 | CH201-11O22   | 1389 | 0 |
| AC185517.2 | 1 | ZMMBBb-120E12 | 1370 | 0 |
| AC197326.4 | 1 | ZMMBBb-175H14 | 1324 | 0 |
| AC205111.3 | 1 | CH201-415M16  | 1315 | 0 |
| AC204471.3 | 1 | CH201-546B6   | 1310 | 0 |
| AC190659.4 | 1 | ZMMBBb-234I10 | 1308 | 0 |
| AC211267.3 | 1 | CH201-207M3   | 1299 | 0 |

|            |   |               |      |   |
|------------|---|---------------|------|---|
| AC177836.2 | 1 | CH201-54G22   | 1287 | 0 |
| AC201773.4 | 1 | CH201-397N22  | 1263 | 0 |
| AC213890.4 | 1 | CH201-88N18   | 1251 | 0 |
| AF546187.1 | 1 | ZMMBBc_576A02 | 1202 | 0 |
| AC186280.4 | 1 | ZMMBBb-439F7  | 1173 | 0 |
| AC204416.4 | 1 | CH201-262J12  | 1171 | 0 |
| AC193997.3 | 1 | CH201-219K14  | 1168 | 0 |
| AC208222.3 | 1 | CH201-76G9    | 1162 | 0 |
| AC177835.2 | 1 | CH201-45O24   | 1160 | 0 |
| AC208205.3 | 1 | CH201-219H23  | 1159 | 0 |
| AC205731.3 | 1 | CH201-117F22  | 1155 | 0 |
| AC214542.3 | 1 | CH201-116F19  | 1119 | 0 |
| AC225222.2 | 1 | CH201-123I12  | 1112 | 0 |
| AC210212.2 | 1 | ZMMBBb-643D8  | 1103 | 0 |
| AC205984.3 | 1 | CH201-252D17  | 1092 | 0 |
| AC211566.3 | 1 | ZMMBBb-469M4  | 1083 | 0 |
| AC205725.4 | 1 | CH201-181D22  | 1079 | 0 |
| AC194252.3 | 1 | CH201-42H19   | 1067 | 0 |
| AC213644.3 | 1 | CH201-425E16  | 1065 | 0 |
| AC205537.3 | 1 | CH201-102N14  | 1041 | 0 |
| AC203578.4 | 1 | CH201-71J13   | 1036 | 0 |
| AC217909.3 | 1 | CH201-478G13  | 969  | 0 |
| AC194043.3 | 1 | CH201-479J2   | 955  | 0 |
| AC213048.3 | 1 | CH201-197B22  | 946  | 0 |
| AC186625.3 | 1 | CH201-243P11  | 931  | 0 |
| AC198995.3 | 1 | ZMMBBb-371O10 | 924  | 0 |
| AC209248.3 | 1 | CH201-264E15  | 922  | 0 |
| AC205289.3 | 1 | CH201-140P6   | 919  | 0 |
| AC177915.2 | 1 | CH201-140E2   | 917  | 0 |
| AC209407.3 | 1 | ZMMBBb-623L15 | 913  | 0 |
| AC216250.3 | 1 | CH201-359I10  | 908  | 0 |
| AC203883.3 | 1 | CH201-118H21  | 902  | 0 |
| AC204591.3 | 1 | CH201-300D2   | 897  | 0 |
| AC210668.3 | 1 | CH201-77D5    | 884  | 0 |
| AC196018.3 | 1 | CH201-122F11  | 875  | 0 |
| AC211166.5 | 1 | CH201-49N10   | 863  | 0 |
| AC208719.3 | 1 | CH201-1P4     | 859  | 0 |
| AC195782.2 | 1 | CH201-188C22  | 857  | 0 |
| AC211503.4 | 1 | CH201-131P13  | 854  | 0 |
| AC197260.3 | 1 | CH201-245C10  | 850  | 0 |
| AC211752.4 | 1 | CH201-490M5   | 830  | 0 |
| AC177820.3 | 1 | CH201-242M10  | 827  | 0 |
| AC213634.3 | 1 | CH201-455F17  | 814  | 0 |
| AC207354.3 | 1 | CH201-142F22  | 787  | 0 |
| AC205966.3 | 1 | ZMMBBb-340C14 | 783  | 0 |
| AC208459.3 | 1 | CH201-384I23  | 771  | 0 |
| AC209712.3 | 1 | CH201-148H9   | 749  | 0 |
| AC207872.3 | 1 | CH201-129D24  | 735  | 0 |
| AC205558.3 | 1 | CH201-290A10  | 729  | 0 |
| AC194854.3 | 1 | CH201-261P15  | 719  | 0 |
| AC199958.4 | 1 | CH201-108L3   | 717  | 0 |
| AC177847.2 | 1 | CH201-78I18   | 695  | 0 |
| AC216255.3 | 1 | CH201-52E13   | 682  | 0 |
| AC194469.3 | 1 | CH201-11H11   | 679  | 0 |

|            |   |               |      |           |
|------------|---|---------------|------|-----------|
| AC191769.4 | 1 | ZMMBBb-109I24 | 677  | 0         |
| AC208444.4 | 1 | CH201-50H23   | 663  | 0         |
| AC211513.3 | 1 | CH201-120E14  | 659  | 0         |
| AC185516.3 | 1 | ZMMBBb-131D17 | 614  | 5.00E-173 |
| AC192460.3 | 1 | CH201-183K18  | 553  | 1.00E-154 |
| AC202896.4 | 1 | CH201-534M1   | 545  | 2.00E-152 |
| AC226340.4 | 2 | CH201-29D11   | 2711 | 0         |
| AC217553.3 | 2 | CH201-309O6   | 2708 | 0         |
| AC235011.1 | 2 | CH201-7F16    | 2702 | 0         |
| AC206601.2 | 2 | CH201-363F19  | 2659 | 0         |
| AC213520.1 | 2 | CH201-325D8   | 2657 | 0         |
| AC190811.2 | 2 | ZMMBBb-472J10 | 2589 | 0         |
| AC198863.3 | 2 | CH201-323D10  | 2565 | 0         |
| AC208633.3 | 2 | CH201-243K24  | 2468 | 0         |
| AC195942.2 | 2 | ZMMBBb-174K24 | 2324 | 0         |
| AC235542.1 | 2 | CH201-453F15  | 2304 | 0         |
| AC231754.2 | 2 | CH201-191K21  | 2289 | 0         |
| AC210197.3 | 2 | CH201-545D15  | 2201 | 0         |
| AC195320.3 | 2 | ZMMBBb-140P21 | 2132 | 0         |
| AC220969.4 | 2 | CH201-339J2   | 2129 | 0         |
| AC195330.3 | 2 | ZMMBBb-559D19 | 2105 | 0         |
| AC177831.3 | 2 | CH201-41F4    | 2082 | 0         |
| AC198078.3 | 2 | CH201-341P6   | 2015 | 0         |
| AC203289.3 | 2 | CH201-461A11  | 1990 | 0         |
| AC191107.4 | 2 | CH201-113B14  | 1957 | 0         |
| AC207640.3 | 2 | CH201-215K19  | 1956 | 0         |
| AC177834.4 | 2 | CH201-43M11   | 1954 | 0         |
| AC198384.3 | 2 | CH201-209C4   | 1902 | 0         |
| AC190741.4 | 2 | ZMMBBb-322K24 | 1898 | 0         |
| AC212779.3 | 2 | CH201-110I6   | 1896 | 0         |
| AC209692.3 | 2 | CH201-20C15   | 1884 | 0         |
| AC177876.2 | 2 | ZMMBBb-284A9  | 1878 | 0         |
| AC215501.3 | 2 | CH201-536K11  | 1876 | 0         |
| AC219084.3 | 2 | ZMMBBb-134L23 | 1873 | 0         |
| AC191353.3 | 2 | CH201-160I1   | 1856 | 0         |
| AC177824.2 | 2 | CH201-259G1   | 1855 | 0         |
| AC177816.2 | 2 | CH201-224L2   | 1853 | 0         |
| AC194726.3 | 2 | ZMMBBb-462F23 | 1842 | 0         |
| AC206761.3 | 2 | ZMMBBb-338J21 | 1840 | 0         |
| AC211692.4 | 2 | CH201-70P21   | 1837 | 0         |
| AC225194.3 | 2 | CH201-516K8   | 1835 | 0         |
| AC206297.2 | 2 | CH201-389J12  | 1833 | 0         |
| AC186613.4 | 2 | CH201-271J1   | 1831 | 0         |
| AC193991.3 | 2 | ZMMBBb-118D9  | 1829 | 0         |
| AC203394.3 | 2 | CH201-307I20  | 1828 | 0         |
| AC190565.2 | 2 | ZMMBBb-139E13 | 1824 | 0         |
| AC194447.3 | 2 | CH201-146E23  | 1819 | 0         |
| AC204650.1 | 2 | CH201-11F19   | 1817 | 0         |
| AC191105.2 | 2 | CH201-322B21  | 1795 | 0         |
| AC210078.3 | 2 | ZMMBBb-356F23 | 1793 | 0         |
| AC209934.4 | 2 | CH201-395I19  | 1792 | 0         |

|            |   |               |      |   |
|------------|---|---------------|------|---|
| AC214758.1 | 2 | ZMMBBb-602C23 | 1790 | 0 |
| AC200113.4 | 2 | CH201-390L19  | 1784 | 0 |
| AC229873.1 | 2 | CH201-387D15  | 1779 | 0 |
| AC200732.3 | 2 | CH201-494G11  | 1777 | 0 |
| AC204413.3 | 2 | CH201-281H24  | 1772 | 0 |
| AC194476.3 | 2 | CH201-112L24  | 1770 | 0 |
| AC207643.3 | 2 | CH201-23G6    | 1750 | 0 |
| AC194662.2 | 2 | CH201-478N15  | 1719 | 0 |
| AC210420.3 | 2 | CH201-530A1   | 1691 | 0 |
| AC191072.3 | 2 | CH201-370E3   | 1687 | 0 |
| AC188739.3 | 2 | CH201-216I16  | 1682 | 0 |
| AC193466.3 | 2 | ZMMBBb-330C21 | 1660 | 0 |
| AC216876.3 | 2 | ZMMBBb-280J7  | 1654 | 0 |
| AC207011.3 | 2 | ZMMBBb-346J3  | 1647 | 0 |
| AC195342.3 | 2 | ZMMBBb-355A22 | 1642 | 0 |
| AC194945.3 | 2 | ZMMBBb-529G20 | 1638 | 0 |
| AC209716.4 | 2 | CH201-222G10  | 1636 | 0 |
| AC206216.3 | 2 | CH201-142D18  | 1629 | 0 |
| AC204680.3 | 2 | ZMMBBb-529M17 | 1627 | 0 |
| AC190584.3 | 2 | CH201-152I15  | 1624 | 0 |
| AC204272.3 | 2 | CH201-528A15  | 1622 | 0 |
| AC177815.2 | 2 | CH201-223D15  | 1620 | 0 |
| AC210300.3 | 2 | CH201-489P18  | 1608 | 0 |
| AC215228.2 | 2 | CH201-301O23  | 1606 | 0 |
| AC191687.3 | 2 | CH201-304A19  | 1599 | 0 |
| AC230027.2 | 2 | CH201-222G13  | 1595 | 0 |
| AC209915.3 | 2 | CH201-366I9   | 1593 | 0 |
| AC214125.5 | 2 | CH201-155N2   | 1588 | 0 |
| AC210108.1 | 2 | ZMMBBb-553M23 | 1582 | 0 |
| AC210093.3 | 2 | ZMMBBb-483J15 | 1581 | 0 |
| AC207007.3 | 2 | ZMMBBb-390C8  | 1577 | 0 |
| AC210690.3 | 2 | CH201-16M1    | 1575 | 0 |
| AC213661.3 | 2 | CH201-6A11    | 1573 | 0 |
| AC177904.2 | 2 | CH201-168L7   | 1572 | 0 |
| AC212883.3 | 2 | CH201-128K3   | 1570 | 0 |
| AC204940.3 | 2 | CH201-329B6   | 1564 | 0 |
| AC209023.3 | 2 | CH201-43P22   | 1561 | 0 |
| AC226603.2 | 2 | ZMMBBb-233J17 | 1559 | 0 |
| AC217551.3 | 2 | ZMMBBb-314N13 | 1557 | 0 |
| AC209728.3 | 2 | CH201-142L18  | 1553 | 0 |
| AC191257.3 | 2 | CH201-445G7   | 1552 | 0 |
| AC212712.3 | 2 | CH201-45F13   | 1546 | 0 |
| AC197086.3 | 2 | CH201-210K4   | 1544 | 0 |
| AC194068.3 | 2 | CH201-454J7   | 1541 | 0 |
| AC219026.3 | 2 | CH201-120M18  | 1537 | 0 |
| AC206973.3 | 2 | CH201-195I9   | 1535 | 0 |
| AC195237.3 | 2 | CH201-196C17  | 1532 | 0 |
| AC191025.3 | 2 | CH201-454L6   | 1528 | 0 |
| AC217421.3 | 2 | ZMMBBb-571P21 | 1523 | 0 |
| AC203818.4 | 2 | CH201-28M17   | 1521 | 0 |
| AC209924.3 | 2 | CH201-384D19  | 1514 | 0 |
| AC209752.3 | 2 | CH201-238B15  | 1510 | 0 |
| AC206854.3 | 2 | ZMMBBb-169K24 | 1508 | 0 |
| AC209028.3 | 2 | CH201-493B17  | 1501 | 0 |

|            |   |               |      |   |
|------------|---|---------------|------|---|
| AC190788.2 | 2 | CH201-213G6   | 1498 | 0 |
| AC207123.3 | 2 | CH201-178O21  | 1494 | 0 |
| AC211969.2 | 2 | CH201-30I23   | 1487 | 0 |
| AC194215.3 | 2 | CH201-291E4   | 1485 | 0 |
| AC213986.4 | 2 | CH201-433L10  | 1476 | 0 |
| AC205608.4 | 2 | CH201-421C6   | 1474 | 0 |
| AC225392.3 | 2 | CH201-495L19  | 1469 | 0 |
| AC209633.2 | 2 | CH201-333F4   | 1467 | 0 |
| AC177868.3 | 2 | ZMMBBb-645F9  | 1465 | 0 |
| AC190507.1 | 2 | CH201-28H1    | 1462 | 0 |
| AC207565.3 | 2 | CH201-274O16  | 1458 | 0 |
| AC190530.2 | 2 | ZMMBBb-603C10 | 1456 | 0 |
| AC197121.3 | 2 | ZMMBBb-616O5  | 1454 | 0 |
| AC225226.2 | 2 | CH201-447P6   | 1445 | 0 |
| AC231182.2 | 2 | CH201-410G18  | 1443 | 0 |
| AC211955.4 | 2 | ZMMBBb-524A14 | 1440 | 0 |
| AC226399.3 | 2 | CH201-351O12  | 1433 | 0 |
| AC208650.3 | 2 | CH201-57F20   | 1425 | 0 |
| AC203684.3 | 2 | ZMMBBb-496A4  | 1406 | 0 |
| AC207383.3 | 2 | ZMMBBb-97H24  | 1404 | 0 |
| AC225331.3 | 2 | CH201-124P4   | 1398 | 0 |
| AC183758.4 | 2 | CH201-168J23  | 1391 | 0 |
| AC187555.4 | 2 | CH201-205P3   | 1388 | 0 |
| AC210678.3 | 2 | ZMMBBb-349K15 | 1377 | 0 |
| AC207385.3 | 2 | ZMMBBb-621L9  | 1370 | 0 |
| AC202010.4 | 2 | CH201-319L13  | 1368 | 0 |
| AC233967.2 | 2 | ZMMBBb-606G9  | 1339 | 0 |
| AC215284.3 | 2 | CH201-169I23  | 1333 | 0 |
| AC212364.3 | 2 | CH201-292L14  | 1297 | 0 |
| AC203232.3 | 2 | CH201-548N8   | 1279 | 0 |
| AC197344.2 | 2 | CH201-317D17  | 1261 | 0 |
| AC204284.4 | 2 | CH201-455J19  | 1252 | 0 |
| AC212399.4 | 2 | ZMMBBb-232K5  | 1186 | 0 |
| AC202085.2 | 2 | CH201-202L10  | 1171 | 0 |
| AC207797.3 | 2 | CH201-403I21  | 1148 | 0 |
| AC206692.3 | 2 | CH201-166J17  | 1117 | 0 |
| AC210203.4 | 2 | CH201-166I20  | 1113 | 0 |
| AC207280.3 | 2 | CH201-130O15  | 1072 | 0 |
| AC203373.4 | 2 | CH201-480I7   | 1050 | 0 |
| AC231376.2 | 2 | ZMMBBb-385N13 | 1043 | 0 |
| AC208355.4 | 2 | ZMMBBb-106J12 | 1041 | 0 |
| AC210011.3 | 2 | CH201-480L13  | 1023 | 0 |
| AC194054.3 | 2 | CH201-467M9   | 985  | 0 |
| AC214129.2 | 2 | CH201-197H16  | 973  | 0 |
| AC207888.3 | 2 | CH201-418I15  | 962  | 0 |
| AC225182.3 | 2 | CH201-435B14  | 957  | 0 |
| AC190765.3 | 2 | CH201-174M21  | 955  | 0 |
| AC233903.1 | 2 | ZMMBBb-131L17 | 940  | 0 |
| AC231193.4 | 2 | ZMMBBb-643K20 | 931  | 0 |
| AC213588.4 | 2 | CH201-211G13  | 924  | 0 |
| AC231544.2 | 2 | CH201-78O11   | 913  | 0 |
| AC194152.3 | 2 | CH201-377F17  | 883  | 0 |
| AC191296.3 | 2 | CH201-301J10  | 879  | 0 |
| AC215196.3 | 2 | CH201-170B11  | 877  | 0 |

|            |   |               |      |           |
|------------|---|---------------|------|-----------|
| AC204660.3 | 2 | ZMMBBb-567C12 | 875  | 0         |
| AC200511.3 | 2 | CH201-175E4   | 845  | 0         |
| AC217280.3 | 2 | ZMMBBb-185O17 | 834  | 0         |
| AC197521.4 | 2 | CH201-415A16  | 816  | 0         |
| AC206625.3 | 2 | ZMMBBb-556E5  | 812  | 0         |
| AC196033.2 | 2 | CH201-114C9   | 809  | 0         |
| AC215879.3 | 2 | CH201-170M8   | 800  | 0         |
| AC204617.4 | 2 | CH201-30D5    | 785  | 0         |
| AC193346.3 | 2 | ZMMBBb-277B4  | 751  | 0         |
| AC194327.3 | 2 | ZMMBBb-385A13 | 715  | 0         |
| AC210308.3 | 2 | CH201-258O7   | 708  | 0         |
| AC207243.3 | 2 | CH201-290M20  | 672  | 0         |
| AC210103.3 | 2 | ZMMBBb-527E22 | 648  | 0         |
| AC209768.3 | 2 | CH201-124C6   | 609  | 2.00E-171 |
| AC217835.3 | 2 | CH201-27J24   | 605  | 3.00E-170 |
| AC219003.1 | 2 | ZMMBBb-466E16 | 589  | 2.00E-165 |
| AC219056.3 | 2 | CH201-277L15  | 558  | 3.00E-156 |
| AC191302.2 | 2 | CH201-9L2     | 536  | 1.00E-149 |
| AC209441.3 | 2 | CH201-374M8   | 526  | 2.00E-146 |
| AC190717.2 | 3 | CH201-251G4   | 2718 | 0         |
| AC231530.2 | 3 | CH201-159J20  | 2654 | 0         |
| AC217424.3 | 3 | ZMMBBb-629I5  | 2652 | 0         |
| AC212321.4 | 3 | CH201-392G7   | 2601 | 0         |
| AC203428.3 | 3 | CH201-159A2   | 2599 | 0         |
| AC183893.3 | 3 | CH201-319J10  | 2594 | 0         |
| AC212001.3 | 3 | CH201-170L20  | 2416 | 0         |
| AC196012.3 | 3 | CH201-130B6   | 2361 | 0         |
| AC198136.3 | 3 | CH201-124H1   | 2338 | 0         |
| AC209803.4 | 3 | CH201-294I14  | 2221 | 0         |
| AC191045.3 | 3 | CH201-74H6    | 2145 | 0         |
| AC211663.4 | 3 | CH201-488E24  | 2143 | 0         |
| AC212714.3 | 3 | CH201-113L22  | 2141 | 0         |
| AC201817.4 | 3 | CH201-188C24  | 2138 | 0         |
| AC190669.3 | 3 | ZMMBBb-242C9  | 2129 | 0         |
| AC208329.3 | 3 | CH201-12E6    | 2118 | 0         |
| AC202180.3 | 3 | CH201-496J24  | 2096 | 0         |
| AC194954.3 | 3 | ZMMBBb-582G20 | 2095 | 0         |
| AC213984.3 | 3 | CH201-380O11  | 2093 | 0         |
| AC213837.3 | 3 | CH201-307L1   | 2082 | 0         |
| AC213353.3 | 3 | CH201-197G7   | 2075 | 0         |
| AC201811.3 | 3 | CH201-232P14  | 2060 | 0         |
| AC196780.4 | 3 | CH201-261G12  | 2051 | 0         |
| AC192463.3 | 3 | CH201-181B20  | 2046 | 0         |
| AC225364.3 | 3 | CH201-484C3   | 2035 | 0         |
| AC197055.3 | 3 | ZMMBBb-386N7  | 2024 | 0         |
| AC200626.3 | 3 | CH201-102I9   | 2015 | 0         |
| AC214538.4 | 3 | CH201-136B11  | 2006 | 0         |
| AC210783.4 | 3 | CH201-194G22  | 1974 | 0         |



|            |   |               |      |   |
|------------|---|---------------|------|---|
| AC210728.3 | 3 | CH201-292B1   | 1970 | 0 |
| AC195131.3 | 3 | ZMMBBb-521D3  | 1956 | 0 |
| AC199783.4 | 3 | CH201-234A14  | 1938 | 0 |
| AC190997.3 | 3 | CH201-472H15  | 1934 | 0 |
| AC210524.3 | 3 | CH201-529P15  | 1932 | 0 |
| AC213879.3 | 3 | CH201-456E18  | 1889 | 0 |
| AC216856.3 | 3 | CH201-386L23  | 1884 | 0 |
| AC214839.3 | 3 | CH201-320J22  | 1878 | 0 |
| AC215293.3 | 3 | CH201-525D17  | 1862 | 0 |
| AC191010.3 | 3 | CH201-62A1    | 1860 | 0 |
| AC182601.3 | 3 | ZMMBBb-357P21 | 1855 | 0 |
| AC191800.3 | 3 | CH201-348M19  | 1851 | 0 |
| AC206395.3 | 3 | CH201-376H14  | 1849 | 0 |
| AC211446.3 | 3 | CH201-375J8   | 1844 | 0 |
| AC209720.3 | 3 | CH201-146B3   | 1840 | 0 |
| AC207250.3 | 3 | CH201-66A10   | 1837 | 0 |
| AC182613.4 | 3 | CH201-29N12   | 1826 | 0 |
| AC211000.3 | 3 | CH201-545P16  | 1817 | 0 |
| AC195060.3 | 3 | ZMMBBb-336O17 | 1806 | 0 |
| AC215260.3 | 3 | CH201-382G7   | 1795 | 0 |
| AC197492.3 | 3 | CH201-158E6   | 1790 | 0 |
| AC207772.3 | 3 | ZMMBBb-485H21 | 1786 | 0 |
| AC206595.2 | 3 | CH201-382D6   | 1779 | 0 |
| AC185233.3 | 3 | CH201-276F7   | 1774 | 0 |
| AC210738.3 | 3 | CH201-259E17  | 1772 | 0 |
| AC211980.3 | 3 | CH201-263M12  | 1754 | 0 |
| AC214002.2 | 3 | CH201-11K16   | 1745 | 0 |
| AC196257.3 | 3 | ZMMBBb-371B13 | 1737 | 0 |
| AC203015.3 | 3 | CH201-115M11  | 1710 | 0 |
| AC209376.3 | 3 | CH201-255O8   | 1698 | 0 |
| AC209387.4 | 3 | CH201-293E23  | 1694 | 0 |
| AC200558.3 | 3 | CH201-91J11   | 1682 | 0 |
| AC200302.4 | 3 | CH201-324G8   | 1680 | 0 |
| AC211631.4 | 3 | CH201-528L2   | 1674 | 0 |
| AC198725.4 | 3 | CH201-181O9   | 1669 | 0 |
| AC215243.3 | 3 | CH201-253A9   | 1658 | 0 |
| AC209789.3 | 3 | CH201-257M9   | 1654 | 0 |
| AC226711.2 | 3 | ZMMBBb-443G11 | 1649 | 0 |
| AC226235.2 | 3 | CH201-216F7   | 1647 | 0 |
| AC196466.3 | 3 | ZMMBBb-469N23 | 1640 | 0 |
| AC210167.4 | 3 | CH201-264I13  | 1635 | 0 |
| AC203326.3 | 3 | CH201-140D14  | 1624 | 0 |
| AC183591.3 | 3 | CH201-166J23  | 1620 | 0 |
| AC214761.3 | 3 | CH201-290F19  | 1618 | 0 |
| AC230013.2 | 3 | CH201-65L10   | 1611 | 0 |
| AC188010.3 | 3 | CH201-462O10  | 1600 | 0 |
| AC219102.3 | 3 | ZMMBBb-320L8  | 1599 | 0 |
| AC207641.3 | 3 | CH201-21E20   | 1588 | 0 |
| AC210024.4 | 3 | CH201-510C15  | 1586 | 0 |
| AC192282.3 | 3 | ZMMBBb-20C7   | 1581 | 0 |
| AC204897.3 | 3 | CH201-104F17  | 1579 | 0 |
| AC208426.3 | 3 | CH201-259G15  | 1577 | 0 |
| AC213982.2 | 3 | CH201-299C15  | 1568 | 0 |
| AC210170.5 | 3 | CH201-218K3   | 1566 | 0 |

|            |   |               |      |   |
|------------|---|---------------|------|---|
| AC200548.3 | 3 | CH201-503F22  | 1564 | 0 |
| AC217119.4 | 3 | CH201-414M14  | 1559 | 0 |
| AC196720.3 | 3 | CH201-243B20  | 1557 | 0 |
| AC211588.3 | 3 | CH201-154P10  | 1555 | 0 |
| AC210008.3 | 3 | CH201-479A2   | 1546 | 0 |
| AC204707.4 | 3 | CH201-390N23  | 1544 | 0 |
| AC185221.2 | 3 | ZMMBBb-293L2  | 1543 | 0 |
| AC191375.3 | 3 | CH201-545M19  | 1537 | 0 |
| AC191002.3 | 3 | CH201-129O19  | 1532 | 0 |
| AC185110.3 | 3 | CH201-528E5   | 1510 | 0 |
| AC210619.3 | 3 | CH201-171P7   | 1507 | 0 |
| AC229673.4 | 3 | CH201-100N3   | 1499 | 0 |
| AC190918.3 | 3 | CH201-530N5   | 1494 | 0 |
| AC207203.3 | 3 | CH201-226J18  | 1492 | 0 |
| AC210205.3 | 3 | CH201-156N4   | 1490 | 0 |
| AC226796.2 | 3 | CH201-455C11  | 1487 | 0 |
| AC203290.3 | 3 | CH201-400B16  | 1485 | 0 |
| AC207794.3 | 3 | CH201-70P17   | 1483 | 0 |
| AC207411.3 | 3 | CH201-192C18  | 1481 | 0 |
| AC209160.4 | 3 | CH201-29P10   | 1480 | 0 |
| AC212807.4 | 3 | CH201-479D24  | 1476 | 0 |
| AC213355.1 | 3 | CH201-202K16  | 1458 | 0 |
| AC209707.3 | 3 | CH201-214P17  | 1456 | 0 |
| AC214493.3 | 3 | CH201-464G15  | 1451 | 0 |
| AC209718.1 | 3 | CH201-143G1   | 1447 | 0 |
| AC201809.4 | 3 | CH201-249O16  | 1443 | 0 |
| AC191316.3 | 3 | CH201-43M4    | 1434 | 0 |
| AC211906.4 | 3 | CH201-519K3   | 1433 | 0 |
| AC205697.3 | 3 | ZMMBBb-291J5  | 1424 | 0 |
| AC209786.3 | 3 | CH201-255F13  | 1413 | 0 |
| AC216267.3 | 3 | CH201-290C9   | 1404 | 0 |
| AC213872.3 | 3 | ZMMBBb-28K7   | 1388 | 0 |
| AC195906.3 | 3 | CH201-26O4    | 1371 | 0 |
| AC194629.3 | 3 | ZMMBBb-575C4  | 1370 | 0 |
| AC204286.3 | 3 | CH201-452N23  | 1361 | 0 |
| AC191569.3 | 3 | CH201-6N14    | 1342 | 0 |
| AC192260.4 | 3 | ZMMBBb-480A3  | 1337 | 0 |
| AC204209.3 | 3 | ZMMBBb-18P21  | 1328 | 0 |
| AC193380.4 | 3 | ZMMBBb-533H11 | 1326 | 0 |
| AC184790.3 | 3 | CH201-14F3    | 1294 | 0 |
| AC208911.3 | 3 | CH201-40P3    | 1258 | 0 |
| AC209761.3 | 3 | CH201-263J12  | 1251 | 0 |
| AC209945.4 | 3 | CH201-408P20  | 1243 | 0 |
| AC211552.4 | 3 | CH201-489A21  | 1234 | 0 |
| AC195234.3 | 3 | CH201-203C1   | 1225 | 0 |
| AC209753.3 | 3 | CH201-239L6   | 1211 | 0 |
| AC190865.2 | 3 | CH201-147D19  | 1205 | 0 |
| AC207628.4 | 3 | CH201-131D20  | 1144 | 0 |
| AC207822.3 | 3 | ZMMBBb-80A13  | 1133 | 0 |
| AC208343.3 | 3 | CH201-337C8   | 1130 | 0 |
| AC191665.3 | 3 | CH201-201N2   | 1115 | 0 |
| AC182628.3 | 3 | CH201-114J9   | 1112 | 0 |
| AC193476.3 | 3 | CH201-310A13  | 1108 | 0 |
| AC187828.3 | 3 | CH201-322D5   | 1104 | 0 |

|            |   |               |      |           |
|------------|---|---------------|------|-----------|
| AC183899.3 | 3 | CH201-231A7   | 1088 | 0         |
| AC196576.3 | 3 | CH201-479H20  | 1036 | 0         |
| AC200556.3 | 3 | CH201-307F14  | 1003 | 0         |
| AC231392.3 | 3 | CH201-128P15  | 996  | 0         |
| AC197579.1 | 3 | CH201-26J19   | 994  | 0         |
| AC212282.3 | 3 | ZMMBBb-128D12 | 989  | 0         |
| AC217267.3 | 3 | ZMMBBb-133P17 | 971  | 0         |
| AC203787.3 | 3 | CH201-448P12  | 958  | 0         |
| AC203180.3 | 3 | CH201-21C6    | 951  | 0         |
| AC200210.1 | 3 | CH201-21A7    | 921  | 0         |
| AC217683.3 | 3 | CH201-493I7   | 901  | 0         |
| AC205520.3 | 3 | CH201-15E3    | 892  | 0         |
| AC214974.3 | 3 | CH201-285L21  | 890  | 0         |
| AC211526.3 | 3 | CH201-106I13  | 856  | 0         |
| AC183784.2 | 3 | CH201-183I8   | 843  | 0         |
| AC203900.4 | 3 | CH201-15G19   | 834  | 0         |
| AC198478.3 | 3 | ZMMBBb-559G20 | 827  | 0         |
| AC198199.4 | 3 | CH201-472P17  | 767  | 0         |
| AC208915.3 | 3 | CH201-289F16  | 738  | 0         |
| AC229885.4 | 3 | CH201-482J15  | 733  | 0         |
| AC208022.3 | 3 | CH201-22D20   | 711  | 0         |
| AC185127.3 | 3 | CH201-328L1   | 708  | 0         |
| AC214491.3 | 3 | CH201-282C3   | 688  | 0         |
| AC197373.4 | 3 | CH201-155H7   | 682  | 0         |
| AC218038.3 | 3 | CH201-138D15  | 639  | 1.00E-180 |
| AC190746.4 | 3 | CH201-22M14   | 621  | 3.00E-175 |
| AC210168.4 | 3 | CH201-252A9   | 614  | 5.00E-173 |
| AC195348.4 | 3 | CH201-38E18   | 612  | 2.00E-172 |
| AC218169.3 | 3 | CH201-424O4   | 592  | 2.00E-166 |
| AC183508.3 | 3 | ZMMBBb-522L17 | 531  | 5.00E-148 |
| AC205838.3 | 4 | CH201-270H2   | 2668 | 0         |
| AC183820.4 | 4 | ZMMBBb-326P21 | 2663 | 0         |
| AC199824.2 | 4 | CH201-118J11  | 2601 | 0         |
| AC193412.3 | 4 | ZMMBBb-106E24 | 2594 | 0         |
| AC190962.2 | 4 | CH201-476L5   | 2563 | 0         |
| AC206281.3 | 4 | CH201-498E5   | 2547 | 0         |
| AC208709.3 | 4 | ZMMBBb-490P16 | 2533 | 0         |
| AC200133.4 | 4 | CH201-299K4   | 2482 | 0         |
| AC186310.4 | 4 | CH201-281D19  | 2450 | 0         |
| AC199802.2 | 4 | CH201-182P11  | 2269 | 0         |
| AC191643.3 | 4 | CH201-30L22   | 2266 | 0         |
| AC208834.3 | 4 | CH201-1N8     | 2149 | 0         |
| AC213878.3 | 4 | CH201-230G2   | 2132 | 0         |
| AC205844.3 | 4 | CH201-234A9   | 2114 | 0         |
| AC211159.3 | 4 | CH201-287O4   | 2107 | 0         |
| AC202878.3 | 4 | CH201-465G14  | 2100 | 0         |
| AC209926.4 | 4 | CH201-386E10  | 2051 | 0         |
| AC203944.4 | 4 | ZMMBBb-547P8  | 2013 | 0         |

|            |   |               |      |   |
|------------|---|---------------|------|---|
| AC211959.4 | 4 | CH201-222A15  | 1975 | 0 |
| AC208452.3 | 4 | CH201-290K1   | 1966 | 0 |
| AC193481.3 | 4 | ZMMBBb-342D13 | 1939 | 0 |
| AC219034.3 | 4 | ZMMBBb-116O5  | 1938 | 0 |
| AC187830.4 | 4 | CH201-324P18  | 1918 | 0 |
| AC196128.3 | 4 | ZMMBBb-288C1  | 1903 | 0 |
| AC195305.3 | 4 | CH201-315A7   | 1902 | 0 |
| AC192600.3 | 4 | CH201-329F5   | 1900 | 0 |
| AC207192.3 | 4 | CH201-374F10  | 1896 | 0 |
| AC209052.3 | 4 | CH201-120E5   | 1894 | 0 |
| AC211258.4 | 4 | CH201-366G15  | 1891 | 0 |
| AC184778.3 | 4 | CH201-21G6    | 1882 | 0 |
| AC185664.2 | 4 | CH201-25H11   | 1876 | 0 |
| AC190666.2 | 4 | CH201-257F3   | 1867 | 0 |
| AC213683.3 | 4 | CH201-182H8   | 1864 | 0 |
| AC206942.3 | 4 | CH201-217N9   | 1855 | 0 |
| AC209900.4 | 4 | CH201-342C5   | 1851 | 0 |
| AC195300.3 | 4 | CH201-9C17    | 1847 | 0 |
| AC205102.3 | 4 | CH201-308K15  | 1835 | 0 |
| AC184707.3 | 4 | CH201-128F20  | 1828 | 0 |
| AC196278.2 | 4 | CH201-11E4    | 1820 | 0 |
| AC210616.4 | 4 | CH201-194J16  | 1810 | 0 |
| AC197063.3 | 4 | ZMMBBb-428H1  | 1806 | 0 |
| AC194964.3 | 4 | CH201-13H23   | 1802 | 0 |
| AC190823.2 | 4 | CH201-212D10  | 1793 | 0 |
| AC194133.3 | 4 | CH201-378O24  | 1788 | 0 |
| AC196972.3 | 4 | ZMMBBb-272J2  | 1777 | 0 |
| AC188711.3 | 4 | CH201-122N9   | 1770 | 0 |
| AC195301.3 | 4 | CH201-9K6     | 1761 | 0 |
| AC192261.3 | 4 | ZMMBBb-604K1  | 1746 | 0 |
| AC204696.3 | 4 | ZMMBBb-215H9  | 1741 | 0 |
| AC204634.3 | 4 | ZMMBBb-394K3  | 1691 | 0 |
| AC183912.3 | 4 | CH201-283H6   | 1687 | 0 |
| AC211472.3 | 4 | CH201-401B12  | 1685 | 0 |
| AC209339.3 | 4 | ZMMBBb-537O3  | 1680 | 0 |
| AC191425.4 | 4 | ZMMBBb-546F20 | 1676 | 0 |
| AC199010.3 | 4 | CH201-105P6   | 1674 | 0 |
| AC205702.4 | 4 | CH201-440J19  | 1662 | 0 |
| AC182108.3 | 4 | ZMMBBb-115A1  | 1640 | 0 |
| AC225817.3 | 4 | CH201-216A17  | 1631 | 0 |
| AC210951.4 | 4 | CH201-162J22  | 1629 | 0 |
| AC205973.3 | 4 | ZMMBBb-575C7  | 1627 | 0 |
| AC205144.3 | 4 | CH201-198B8   | 1624 | 0 |
| AC205837.3 | 4 | CH201-268K17  | 1618 | 0 |
| AC205526.4 | 4 | CH201-119E13  | 1615 | 0 |
| AC205270.3 | 4 | CH201-216N11  | 1606 | 0 |
| AC185231.4 | 4 | CH201-30K18   | 1602 | 0 |
| AC182836.2 | 4 | CH201-170P7   | 1600 | 0 |
| AC226240.2 | 4 | CH201-175I9   | 1597 | 0 |
| AC185126.3 | 4 | CH201-179E3   | 1593 | 0 |
| AC185647.3 | 4 | CH201-392F1   | 1591 | 0 |
| AC212092.4 | 4 | CH201-525I4   | 1590 | 0 |
| AC191248.3 | 4 | ZMMBBb-175L3  | 1582 | 0 |
| AC231977.4 | 4 | ZMMBBb-326B4  | 1581 | 0 |

|            |   |               |      |   |
|------------|---|---------------|------|---|
| AC194259.3 | 4 | CH201-51O3    | 1579 | 0 |
| AC216262.2 | 4 | CH201-314C7   | 1577 | 0 |
| AC188728.3 | 4 | CH201-171P20  | 1575 | 0 |
| AC210034.1 | 4 | ZMMBBb-143L13 | 1570 | 0 |
| AC210819.3 | 4 | CH201-363J8   | 1555 | 0 |
| AC206244.3 | 4 | CH201-523K21  | 1552 | 0 |
| AC220978.3 | 4 | ZMMBBb-324P10 | 1550 | 0 |
| AC201881.3 | 4 | ZMMBBb-200M9  | 1544 | 0 |
| AC208658.3 | 4 | CH201-323K11  | 1539 | 0 |
| AC182107.3 | 4 | ZMMBBb-106M23 | 1534 | 0 |
| AC211786.3 | 4 | ZMMBBb-629L18 | 1532 | 0 |
| AC219016.3 | 4 | ZMMBBb-528L20 | 1525 | 0 |
| AC216279.3 | 4 | CH201-170D22  | 1516 | 0 |
| AC229582.2 | 4 | CH201-43J7    | 1508 | 0 |
| AC188027.3 | 4 | ZMMBBb-346B21 | 1507 | 0 |
| AC187833.2 | 4 | CH201-548G5   | 1492 | 0 |
| AC193492.3 | 4 | CH201-341O15  | 1490 | 0 |
| AC225064.2 | 4 | CH201-19B18   | 1487 | 0 |
| AC186155.3 | 4 | ZMMBBb-290B21 | 1485 | 0 |
| AC211700.4 | 4 | CH201-192P9   | 1483 | 0 |
| AC202453.4 | 4 | CH201-11L7    | 1481 | 0 |
| AC212096.3 | 4 | CH201-204L21  | 1478 | 0 |
| AC182823.3 | 4 | CH201-256F5   | 1474 | 0 |
| AC205536.3 | 4 | CH201-106C18  | 1471 | 0 |
| AC186499.3 | 4 | ZMMBBb-243P4  | 1467 | 0 |
| AC206282.3 | 4 | CH201-290I10  | 1465 | 0 |
| AC206877.3 | 4 | CH201-121C18  | 1462 | 0 |
| AC206976.3 | 4 | ZMMBBb-454K3  | 1458 | 0 |
| AC213432.2 | 4 | CH201-241B13  | 1456 | 0 |
| AC193449.3 | 4 | ZMMBBb-316N18 | 1453 | 0 |
| AC191950.3 | 4 | CH201-321C15  | 1451 | 0 |
| AC208456.3 | 4 | CH201-345E23  | 1442 | 0 |
| AC196057.3 | 4 | CH201-438O13  | 1431 | 0 |
| AC210662.4 | 4 | CH201-271A24  | 1429 | 0 |
| AC212893.3 | 4 | CH201-222H1   | 1427 | 0 |
| AC194193.3 | 4 | CH201-313L16  | 1425 | 0 |
| AC206334.3 | 4 | CH201-127F3   | 1418 | 0 |
| AC208557.3 | 4 | CH201-479K18  | 1415 | 0 |
| AC203567.3 | 4 | CH201-376K22  | 1404 | 0 |
| AC226533.2 | 4 | ZMMBBb-340L13 | 1398 | 0 |
| AC191360.3 | 4 | CH201-216K8   | 1364 | 0 |
| AC215681.3 | 4 | CH201-197B3   | 1339 | 0 |
| AC186596.3 | 4 | ZMMBBb-103K24 | 1324 | 0 |
| AC206952.3 | 4 | CH201-59G17   | 1315 | 0 |
| AC187060.6 | 4 | ZMMBBb-500B24 | 1314 | 0 |
| AC205282.2 | 4 | CH201-173D5   | 1310 | 0 |
| AC213880.3 | 4 | CH201-465N3   | 1279 | 0 |
| AC208896.3 | 4 | CH201-139L11  | 1270 | 0 |
| AC194445.3 | 4 | CH201-149K8   | 1269 | 0 |
| AC187909.3 | 4 | CH201-162H5   | 1267 | 0 |
| AC216254.3 | 4 | CH201-3H6     | 1247 | 0 |
| AC210617.4 | 4 | CH201-206O3   | 1236 | 0 |
| AC185111.3 | 4 | CH201-538D10  | 1214 | 0 |
| AC205616.5 | 4 | CH201-66A13   | 1211 | 0 |

|            |   |               |      |           |
|------------|---|---------------|------|-----------|
| AC209649.3 | 4 | ZMMBBb-176C4  | 1166 | 0         |
| AC205508.3 | 4 | CH201-260N12  | 1159 | 0         |
| AC197381.3 | 4 | CH201-138E5   | 1097 | 0         |
| AC202916.3 | 4 | ZMMBBb-583I22 | 1088 | 0         |
| AC200123.4 | 4 | CH201-336B2   | 1085 | 0         |
| AC193599.3 | 4 | CH201-10B17   | 1079 | 0         |
| AC205380.3 | 4 | CH201-142B14  | 1070 | 0         |
| AC216808.3 | 4 | ZMMBBb-500F18 | 1067 | 0         |
| AC206160.3 | 4 | CH201-311G22  | 1052 | 0         |
| AC205267.3 | 4 | CH201-216O21  | 1047 | 0         |
| AC185966.4 | 4 | CH201-87E18   | 1025 | 0         |
| AC200293.4 | 4 | CH201-461K2   | 984  | 0         |
| AC214635.3 | 4 | CH201-214O21  | 971  | 0         |
| AC205971.3 | 4 | ZMMBBb-538B19 | 949  | 0         |
| AC207197.1 | 4 | CH201-82D16   | 946  | 0         |
| AC212445.3 | 4 | CH201-244M24  | 942  | 0         |
| AC204822.3 | 4 | ZMMBBb-636L7  | 937  | 0         |
| AC194741.3 | 4 | CH201-108K1   | 931  | 0         |
| AC189677.4 | 4 | ZMMBBb-192E18 | 930  | 0         |
| AC210161.3 | 4 | CH201-87M22   | 908  | 0         |
| AC210146.3 | 4 | CH201-438P7   | 897  | 0         |
| AC212977.2 | 4 | ZMMBBb-469N11 | 895  | 0         |
| AC203399.3 | 4 | CH201-73J15   | 884  | 0         |
| AC203930.3 | 4 | CH201-496J17  | 861  | 0         |
| AC220997.2 | 4 | CH201-525G4   | 859  | 0         |
| AC203867.4 | 4 | CH201-142D5   | 848  | 0         |
| AC192159.2 | 4 | ZMMBBb-269E19 | 847  | 0         |
| AC205414.3 | 4 | CH201-71O14   | 836  | 0         |
| AC203990.3 | 4 | CH201-66N2    | 818  | 0         |
| AC185478.4 | 4 | CH201-203H3   | 769  | 0         |
| AC191412.3 | 4 | ZMMBBb-555H5  | 765  | 0         |
| AC208432.2 | 4 | CH201-26E6    | 756  | 0         |
| AC233896.1 | 4 | ZMMBBb-100L15 | 749  | 0         |
| AC188008.3 | 4 | CH201-455A10  | 722  | 0         |
| AC204710.4 | 4 | CH201-319P11  | 717  | 0         |
| AC206780.3 | 4 | CH201-177C11  | 664  | 0         |
| AC195337.3 | 4 | ZMMBBb-347O1  | 659  | 0         |
| AC191405.3 | 4 | CH201-177D20  | 643  | 0         |
| AC196368.3 | 4 | CH201-212M6   | 634  | 5.00E-179 |
| AC215237.3 | 4 | CH201-37L13   | 625  | 3.00E-176 |
| AC214432.4 | 4 | CH201-69I21   | 578  | 4.00E-162 |
| AC205254.3 | 4 | CH201-289B1   | 554  | 4.00E-155 |
| AC209688.3 | 5 | CH201-1O1     | 2711 | 0         |
| AC206874.3 | 5 | CH201-138F18  | 2684 | 0         |
| AC207723.3 | 5 | CH201-106O2   | 2679 | 0         |
| AC202567.4 | 5 | CH201-379M16  | 2677 | 0         |
| AC217292.3 | 5 | ZMMBBb-265M5  | 2643 | 0         |
| AC213803.3 | 5 | CH201-11K20   | 2637 | 0         |
| AC209942.3 | 5 | CH201-403O21  | 2589 | 0         |
| AC191803.3 | 5 | CH201-80P16   | 2497 | 0         |

|            |   |               |      |   |
|------------|---|---------------|------|---|
| AC185486.3 | 5 | CH201-162J17  | 2480 | 0 |
| AC196025.3 | 5 | CH201-11G21   | 2479 | 0 |
| AC204274.3 | 5 | CH201-516A13  | 2462 | 0 |
| AC194082.3 | 5 | CH201-23L17   | 2406 | 0 |
| AC208516.2 | 5 | CH201-123J3   | 2405 | 0 |
| AC191361.4 | 5 | CH201-216O9   | 2397 | 0 |
| AC213395.3 | 5 | CH201-386H22  | 2381 | 0 |
| AC217845.3 | 5 | ZMMBBb-174K17 | 2129 | 0 |
| AC185435.3 | 5 | CH201-472P11  | 2109 | 0 |
| AC207108.3 | 5 | CH201-317O11  | 2102 | 0 |
| AC184703.5 | 5 | CH201-6M3     | 2030 | 0 |
| AC203390.3 | 5 | CH201-321N11  | 2028 | 0 |
| AC209741.3 | 5 | CH201-127L3   | 1938 | 0 |
| AC219089.3 | 5 | ZMMBBb-171E17 | 1932 | 0 |
| AC185238.4 | 5 | CH201-11H5    | 1920 | 0 |
| AC213887.3 | 5 | CH201-337A18  | 1911 | 0 |
| AC213883.3 | 5 | CH201-236J16  | 1903 | 0 |
| AC213040.4 | 5 | CH201-490I24  | 1896 | 0 |
| AC209835.4 | 5 | CH201-56I24   | 1887 | 0 |
| AC205104.3 | 5 | ZMMBBb-550G23 | 1884 | 0 |
| AC194218.3 | 5 | CH201-292C16  | 1876 | 0 |
| AC203024.5 | 5 | ZMMBBb-265P18 | 1856 | 0 |
| AC218944.1 | 5 | CH201-91C13   | 1853 | 0 |
| AC214449.3 | 5 | CH201-455J8   | 1847 | 0 |
| AC198865.3 | 5 | CH201-47P15   | 1844 | 0 |
| AC209947.4 | 5 | CH201-411F1   | 1837 | 0 |
| AC215499.3 | 5 | CH201-501P4   | 1835 | 0 |
| AC207648.3 | 5 | CH201-30M22   | 1828 | 0 |
| AC202968.3 | 5 | CH201-284F9   | 1819 | 0 |
| AC229989.2 | 5 | ZMMBBb-185A22 | 1804 | 0 |
| AC197848.3 | 5 | CH201-117O10  | 1801 | 0 |
| AC208209.3 | 5 | CH201-248A9   | 1795 | 0 |
| AC197764.4 | 5 | ZMMBBb-211M20 | 1777 | 0 |
| AC206941.3 | 5 | CH201-216L5   | 1755 | 0 |
| AC185266.3 | 5 | CH201-351D7   | 1748 | 0 |
| AC203096.3 | 5 | CH201-203A6   | 1743 | 0 |
| AC214452.4 | 5 | CH201-156B13  | 1734 | 0 |
| AC209337.3 | 5 | ZMMBBb-281I2  | 1723 | 0 |
| AC191041.3 | 5 | CH201-120G9   | 1678 | 0 |
| AC206055.3 | 5 | ZMMBBb-147M19 | 1671 | 0 |
| AC219152.4 | 5 | CH201-490P19  | 1667 | 0 |
| AC208117.3 | 5 | CH201-58P7    | 1653 | 0 |
| AC209435.4 | 5 | CH201-56F3    | 1645 | 0 |
| AC197693.3 | 5 | CH201-546H1   | 1636 | 0 |
| AC196393.3 | 5 | ZMMBBb-290F9  | 1633 | 0 |
| AC194321.3 | 5 | CH201-205N23  | 1629 | 0 |
| AC185439.4 | 5 | CH201-463E23  | 1627 | 0 |
| AC186688.4 | 5 | ZMMBBb-282P2  | 1620 | 0 |
| AC197847.3 | 5 | CH201-53C9    | 1611 | 0 |
| AC214768.3 | 5 | CH201-202B4   | 1602 | 0 |
| AC210145.3 | 5 | CH201-400B22  | 1597 | 0 |
| AC207247.3 | 5 | CH201-86F5    | 1581 | 0 |
| AC209051.3 | 5 | CH201-11L4    | 1579 | 0 |
| AC203254.3 | 5 | CH201-243A22  | 1568 | 0 |

|            |   |               |      |   |
|------------|---|---------------|------|---|
| AC204038.3 | 5 | ZMMBBb-468F15 | 1563 | 0 |
| AC214350.3 | 5 | CH201-448A9   | 1561 | 0 |
| AC214256.3 | 5 | CH201-423O3   | 1553 | 0 |
| AC185487.4 | 5 | CH201-180O1   | 1550 | 0 |
| AC193783.3 | 5 | CH201-339P24  | 1544 | 0 |
| AC210058.3 | 5 | ZMMBBb-234K20 | 1543 | 0 |
| AC216257.3 | 5 | CH201-51N18   | 1541 | 0 |
| AC214433.3 | 5 | CH201-7C8     | 1525 | 0 |
| AC204770.3 | 5 | CH201-261K24  | 1523 | 0 |
| AC211920.3 | 5 | CH201-468F8   | 1521 | 0 |
| AC212338.3 | 5 | CH201-226A18  | 1517 | 0 |
| AC215168.3 | 5 | CH201-285D18  | 1516 | 0 |
| AC209836.3 | 5 | CH201-57H9    | 1514 | 0 |
| AC204761.3 | 5 | CH201-470D23  | 1512 | 0 |
| AC200254.4 | 5 | CH201-88F15   | 1505 | 0 |
| AC233915.1 | 5 | ZMMBBb-237M3  | 1503 | 0 |
| AC209168.3 | 5 | ZMMBBb-138C10 | 1499 | 0 |
| AC185257.3 | 5 | CH201-390O9   | 1490 | 0 |
| AC197023.2 | 5 | CH201-482M16  | 1489 | 0 |
| AC225217.2 | 5 | CH201-65H7    | 1485 | 0 |
| AC183969.3 | 5 | ZMMBBb-361I20 | 1483 | 0 |
| AC184862.4 | 5 | CH201-185I10  | 1474 | 0 |
| AC213623.3 | 5 | CH201-479P6   | 1471 | 0 |
| AC210144.3 | 5 | CH201-392N16  | 1469 | 0 |
| AC187783.3 | 5 | CH201-36B3    | 1465 | 0 |
| AC204652.3 | 5 | CH201-112O2   | 1454 | 0 |
| AC207680.3 | 5 | CH201-514E12  | 1453 | 0 |
| AC190742.3 | 5 | ZMMBBb-324N6  | 1451 | 0 |
| AC214287.3 | 5 | CH201-58L9    | 1443 | 0 |
| AC216236.3 | 5 | CH201-349K9   | 1442 | 0 |
| AC203443.3 | 5 | CH201-102O23  | 1436 | 0 |
| AC183413.3 | 5 | ZMMBBb-98M14  | 1434 | 0 |
| AC183815.4 | 5 | ZMMBBb-468I19 | 1416 | 0 |
| AC226216.1 | 5 | CH201-455M22  | 1415 | 0 |
| AC225820.2 | 5 | CH201-110F10  | 1413 | 0 |
| AC205979.3 | 5 | CH201-289A6   | 1409 | 0 |
| AC204435.3 | 5 | CH201-111B5   | 1393 | 0 |
| AC185617.3 | 5 | CH201-530E1   | 1388 | 0 |
| AC201905.4 | 5 | CH201-54D5    | 1375 | 0 |
| AC217429.3 | 5 | ZMMBBb-589M12 | 1357 | 0 |
| AC195947.3 | 5 | ZMMBBb-188A3  | 1344 | 0 |
| AC208973.3 | 5 | CH201-257F15  | 1342 | 0 |
| AC215289.3 | 5 | CH201-476G23  | 1337 | 0 |
| AC209436.4 | 5 | CH201-60L21   | 1315 | 0 |
| AC200675.3 | 5 | CH201-109E4   | 1294 | 0 |
| AC191676.3 | 5 | CH201-143F13  | 1290 | 0 |
| AC207656.3 | 5 | CH201-353A14  | 1209 | 0 |
| AC190643.4 | 5 | CH201-162M9   | 1204 | 0 |
| AC206215.2 | 5 | CH201-143L17  | 1202 | 0 |
| AC190787.3 | 5 | CH201-183N23  | 1178 | 0 |
| AC191334.1 | 5 | CH201-482I6   | 1146 | 0 |
| AC192404.3 | 5 | CH201-163C22  | 1119 | 0 |
| AC204576.3 | 5 | CH201-323K19  | 1099 | 0 |
| AC208848.3 | 5 | CH201-402E12  | 1086 | 0 |



|            |   |               |      |           |
|------------|---|---------------|------|-----------|
| AC202920.3 | 5 | ZMMBBb-138B10 | 1085 | 0         |
| AC184176.2 | 5 | CH201-200B12  | 1081 | 0         |
| AC198130.3 | 5 | CH201-91L24   | 1068 | 0         |
| AC191422.3 | 5 | ZMMBBb-398D14 | 1056 | 0         |
| AC206260.3 | 5 | CH201-27O13   | 951  | 0         |
| AC192251.3 | 5 | CH201-159B16  | 948  | 0         |
| AC209874.4 | 5 | CH201-17L13   | 940  | 0         |
| AC206982.2 | 5 | CH201-166B11  | 933  | 0         |
| AC190512.1 | 5 | CH201-252N5   | 911  | 0         |
| AC209794.3 | 5 | CH201-309J19  | 910  | 0         |
| AC204298.3 | 5 | CH201-312C13  | 892  | 0         |
| AC194934.3 | 5 | ZMMBBb-391O5  | 879  | 0         |
| AC205364.3 | 5 | CH201-230C2   | 866  | 0         |
| AC194484.3 | 5 | CH201-103C6   | 865  | 0         |
| AC198134.4 | 5 | CH201-211E4   | 839  | 0         |
| AC210874.3 | 5 | CH201-566E1   | 829  | 0         |
| AC185511.3 | 5 | CH201-339H12  | 821  | 0         |
| AC196643.3 | 5 | CH201-294M20  | 816  | 0         |
| AC186681.3 | 5 | ZMMBBb-317C10 | 812  | 0         |
| AC215929.3 | 5 | CH201-457K1   | 783  | 0         |
| AC190573.3 | 5 | CH201-27E17   | 769  | 0         |
| AC200224.3 | 5 | CH201-547A4   | 735  | 0         |
| AC191094.2 | 5 | CH201-325C16  | 702  | 0         |
| AC211216.3 | 5 | CH201-115O6   | 695  | 0         |
| AC195246.3 | 5 | CH201-163L12  | 681  | 0         |
| AC208403.3 | 5 | CH201-110C19  | 654  | 0         |
| AC208417.3 | 5 | CH201-225P16  | 643  | 0         |
| AC215857.3 | 5 | CH201-26K4    | 636  | 2.00E-179 |
| AC202441.3 | 5 | CH201-29G9    | 627  | 8.00E-177 |
| AC210721.4 | 5 | ZMMBBb-28L24  | 601  | 3.00E-169 |
| AC211247.4 | 5 | CH201-477E7   | 596  | 1.00E-167 |
| AC211357.5 | 5 | CH201-261I19  | 592  | 2.00E-166 |
| AY542797.1 | 5 | Z474J15       | 560  | 1.00E-156 |
| AC204708.3 | 5 | CH201-335N16  | 544  | 7.00E-152 |
| AC214671.3 | 5 | CH201-495P7   | 526  | 2.00E-146 |
| AC190561.3 | 6 | CH201-282G6   | 2704 | 0         |
| AC204401.4 | 6 | CH201-463D5   | 2677 | 0         |
| AC197562.3 | 6 | CH201-300M4   | 2636 | 0         |
| AC208927.4 | 6 | CH201-448A7   | 2625 | 0         |
| AC216196.3 | 6 | CH201-170P15  | 2603 | 0         |
| AC208674.3 | 6 | CH201-507M21  | 2598 | 0         |
| AC217349.3 | 6 | CH201-317F9   | 2590 | 0         |
| AC204276.3 | 6 | CH201-498N18  | 2583 | 0         |
| AC208425.3 | 6 | CH201-259E12  | 2574 | 0         |
| AC200479.4 | 6 | ZMMBBb-122L14 | 2560 | 0         |
| AC194458.3 | 6 | CH201-133E10  | 2553 | 0         |

|            |   |               |      |   |
|------------|---|---------------|------|---|
| AC202403.4 | 6 | CH201-200M17  | 2549 | 0 |
| AC209703.3 | 6 | CH201-153G19  | 2547 | 0 |
| AC194077.3 | 6 | CH201-421E11  | 2540 | 0 |
| AC212026.5 | 6 | CH201-323O19  | 2502 | 0 |
| AC208076.3 | 6 | CH201-6M19    | 2500 | 0 |
| AC187775.3 | 6 | CH201-101J21  | 2480 | 0 |
| AC214241.4 | 6 | CH201-265E22  | 2450 | 0 |
| AC209056.2 | 6 | CH201-208E12  | 2394 | 0 |
| AC208555.3 | 6 | CH201-470P24  | 2345 | 0 |
| AC204582.4 | 6 | CH201-319L2   | 2293 | 0 |
| AC210157.3 | 6 | ZMMBBb-545E10 | 2120 | 0 |
| AC206873.3 | 6 | CH201-166P19  | 2100 | 0 |
| AC211527.3 | 6 | CH201-107A12  | 2095 | 0 |
| AC194363.3 | 6 | ZMMBBb-550O15 | 2087 | 0 |
| AC205279.3 | 6 | CH201-17G8    | 2085 | 0 |
| AC187281.4 | 6 | CH201-323O5   | 2082 | 0 |
| AC202087.4 | 6 | CH201-524E4   | 2071 | 0 |
| AC205358.3 | 6 | CH201-263P17  | 2067 | 0 |
| AC205121.3 | 6 | ZMMBBb-409P2  | 2048 | 0 |
| AC211333.5 | 6 | CH201-63E21   | 2039 | 0 |
| AC187358.2 | 6 | CH201-321G16  | 2017 | 0 |
| AC202899.3 | 6 | CH201-542P12  | 2013 | 0 |
| AC206312.3 | 6 | CH201-167I5   | 1972 | 0 |
| AC210830.3 | 6 | CH201-479L10  | 1902 | 0 |
| AC204288.3 | 6 | CH201-436L2   | 1893 | 0 |
| AC208522.4 | 6 | CH201-216N16  | 1891 | 0 |
| AC205337.3 | 6 | CH201-85C14   | 1878 | 0 |
| AC187288.3 | 6 | CH201-273K16  | 1874 | 0 |
| AC212330.3 | 6 | CH201-170H19  | 1864 | 0 |
| AC186436.3 | 6 | CH201-273D22  | 1856 | 0 |
| AC200497.4 | 6 | CH201-6M15    | 1842 | 0 |
| AC212119.3 | 6 | ZMMBBb-138F4  | 1828 | 0 |
| AC191271.2 | 6 | CH201-117M1   | 1813 | 0 |
| AC187260.3 | 6 | CH201-393J13  | 1811 | 0 |
| AC195683.3 | 6 | CH201-555I15  | 1810 | 0 |
| AC194637.3 | 6 | ZMMBBb-476H14 | 1808 | 0 |
| AC215606.3 | 6 | CH201-285I6   | 1792 | 0 |
| AC204309.3 | 6 | CH201-59I7    | 1775 | 0 |
| AC213464.3 | 6 | CH201-197G5   | 1763 | 0 |
| AC200867.4 | 6 | CH201-88I13   | 1754 | 0 |
| AC215614.3 | 6 | CH201-151E20  | 1727 | 0 |
| AC186863.4 | 6 | CH201-479F20  | 1710 | 0 |
| AC210659.3 | 6 | CH201-222B2   | 1698 | 0 |
| AC214164.3 | 6 | ZMMBBb-189I18 | 1680 | 0 |
| AC194137.3 | 6 | CH201-381O13  | 1674 | 0 |
| AC194411.3 | 6 | CH201-17N1    | 1663 | 0 |
| AC213846.4 | 6 | ZMMBBb-385M23 | 1653 | 0 |
| AC198889.3 | 6 | CH201-410E24  | 1636 | 0 |
| AC206660.4 | 6 | CH201-463K2   | 1631 | 0 |
| AC201779.4 | 6 | CH201-363N10  | 1622 | 0 |
| AC215859.3 | 6 | CH201-2F21    | 1618 | 0 |
| AC209910.3 | 6 | CH201-362I4   | 1617 | 0 |
| AC194242.4 | 6 | CH201-56P17   | 1595 | 0 |
| AC213839.3 | 6 | CH201-319P10  | 1586 | 0 |

|            |   |               |      |   |
|------------|---|---------------|------|---|
| AC200263.4 | 6 | CH201-120N24  | 1579 | 0 |
| AC219050.3 | 6 | ZMMBBb-337C6  | 1557 | 0 |
| AC209257.4 | 6 | CH201-402J1   | 1555 | 0 |
| AC194632.2 | 6 | ZMMBBb-516M23 | 1550 | 0 |
| AC188962.3 | 6 | CH201-162D8   | 1541 | 0 |
| AC205347.3 | 6 | CH201-61F23   | 1539 | 0 |
| AC206247.3 | 6 | CH201-497N24  | 1537 | 0 |
| AC209694.4 | 6 | CH201-214K2   | 1530 | 0 |
| AC206217.3 | 6 | CH201-142F16  | 1526 | 0 |
| AC203754.4 | 6 | CH201-340M23  | 1523 | 0 |
| AC235543.1 | 6 | CH201-540E9   | 1521 | 0 |
| AC206226.2 | 6 | ZMMBBb-217M21 | 1508 | 0 |
| AC194322.4 | 6 | CH201-206C6   | 1505 | 0 |
| AC211532.3 | 6 | ZMMBBb-137I13 | 1503 | 0 |
| AC203162.4 | 6 | ZMMBBb-130K4  | 1501 | 0 |
| AC204352.3 | 6 | CH201-57B5    | 1494 | 0 |
| AC219020.4 | 6 | CH201-474F17  | 1490 | 0 |
| AC205344.3 | 6 | CH201-64D8    | 1489 | 0 |
| AC203793.3 | 6 | CH201-513O14  | 1487 | 0 |
| AC187162.3 | 6 | CH201-215I21  | 1485 | 0 |
| AC203146.3 | 6 | ZMMBBb-86O24  | 1471 | 0 |
| AC213050.3 | 6 | CH201-188O15  | 1462 | 0 |
| AC195382.3 | 6 | CH201-136L17  | 1458 | 0 |
| AC216013.3 | 6 | CH201-28K5    | 1454 | 0 |
| AC196777.3 | 6 | CH201-402K9   | 1447 | 0 |
| AC196678.3 | 6 | CH201-483M21  | 1443 | 0 |
| AC206033.3 | 6 | CH201-135H3   | 1440 | 0 |
| AC203939.3 | 6 | CH201-393N24  | 1438 | 0 |
| AC194642.2 | 6 | ZMMBBb-398G14 | 1424 | 0 |
| AC190971.3 | 6 | CH201-474P17  | 1418 | 0 |
| AC212280.4 | 6 | ZMMBBb-361E16 | 1406 | 0 |
| AC207189.4 | 6 | CH201-475L9   | 1332 | 0 |
| AC189048.2 | 6 | ZMMBBb-29F4   | 1312 | 0 |
| AC204068.3 | 6 | CH201-120M10  | 1301 | 0 |
| AC206165.3 | 6 | CH201-341K12  | 1290 | 0 |
| AC190994.3 | 6 | CH201-464D8   | 1283 | 0 |
| AC209708.3 | 6 | CH201-216I15  | 1252 | 0 |
| AC218983.2 | 6 | CH201-70F12   | 1234 | 0 |
| AC205727.3 | 6 | CH201-16N7    | 1227 | 0 |
| AC198720.3 | 6 | CH201-426J18  | 1220 | 0 |
| AC196055.2 | 6 | CH201-412K14  | 1187 | 0 |
| AC188978.3 | 6 | CH201-275J22  | 1182 | 0 |
| AC225706.3 | 6 | CH201-107O16  | 1169 | 0 |
| AC209760.3 | 6 | CH201-262J13  | 1162 | 0 |
| AC203177.3 | 6 | CH201-21P8    | 1155 | 0 |
| AC195788.2 | 6 | CH201-202H20  | 1153 | 0 |
| AC197143.3 | 6 | CH201-127O20  | 1126 | 0 |
| AC209256.4 | 6 | CH201-399G16  | 1090 | 0 |
| AC206345.3 | 6 | ZMMBBb-129M20 | 1085 | 0 |
| AC203340.3 | 6 | CH201-101J10  | 1081 | 0 |
| AC195867.2 | 6 | ZMMBBb-347O9  | 1029 | 0 |
| AC193463.3 | 6 | CH201-260H3   | 1012 | 0 |
| AC199497.4 | 6 | CH201-155J19  | 1000 | 0 |
| AC194874.3 | 6 | CH201-272K20  | 993  | 0 |

|            |   |               |      |        |
|------------|---|---------------|------|--------|
| AC220926.3 | 6 | CH201-95N4    | 984  | 0      |
| AC226537.2 | 6 | ZMMBBb-123A9  | 933  | 0      |
| AC233951.1 | 6 | ZMMBBb-582A10 | 930  | 0      |
| AC204855.3 | 6 | CH201-321A15  | 901  | 0      |
| AC195928.2 | 6 | CH201-276J19  | 883  | 0      |
| AC209076.3 | 6 | CH201-451K18  | 857  | 0      |
| AC207259.3 | 6 | CH201-26A22   | 850  | 0      |
| AC203315.4 | 6 | CH201-229K24  | 805  | 0      |
| AC199568.3 | 6 | CH201-206G4   | 796  | 0      |
| AC231976.2 | 6 | ZMMBBb-385E12 | 778  | 0      |
| AC214457.3 | 6 | CH201-117G22  | 773  | 0      |
| AC217346.3 | 6 | CH201-75P14   | 760  | 0      |
| AC203675.3 | 6 | CH201-249P16  | 755  | 0      |
| AC205415.3 | 6 | CH201-60P8    | 715  | 0      |
| AC203819.4 | 6 | CH201-30O13   | 708  | 0      |
| AC229998.2 | 6 | CH201-428I16  | 706  | 0      |
| AC209362.3 | 6 | CH201-137L12  | 704  | 0      |
| AC188710.4 | 6 | CH201-11O16   | 668  | 0      |
| AC205349.3 | 6 | CH201-55P21   | 657  | 0      |
|            |   |               |      | 3.00E- |
| AC205886.3 | 6 | ZMMBBb-211B7  | 558  | 156    |
| AC198603.3 | 7 | CH201-48F6    | 2648 | 0      |
| AC204952.3 | 7 | CH201-10O9    | 2641 | 0      |
| AC204521.3 | 7 | CH201-504P3   | 2617 | 0      |
| AC196407.3 | 7 | CH201-324L8   | 2547 | 0      |
| AC218939.2 | 7 | CH201-393N19  | 2544 | 0      |
| AC225564.3 | 7 | CH201-168O17  | 2453 | 0      |
| AC198598.3 | 7 | ZMMBBb-293G21 | 2443 | 0      |
| AC205128.3 | 7 | CH201-32A8    | 2217 | 0      |
| AC199880.4 | 7 | CH201-464N3   | 2165 | 0      |
| AC198024.3 | 7 | CH201-47A18   | 2105 | 0      |
| AC214798.2 | 7 | CH201-197I3   | 2091 | 0      |
| AC195929.2 | 7 | CH201-276K9   | 2049 | 0      |
| AC205322.3 | 7 | CH201-477O13  | 2046 | 0      |
| AC208985.3 | 7 | ZMMBBb-269L6  | 2040 | 0      |
| AC210086.4 | 7 | ZMMBBb-430D20 | 2031 | 0      |
| AC193494.3 | 7 | ZMMBBb-381I8  | 2008 | 0      |
| AC195149.2 | 7 | ZMMBBb-386L2  | 1984 | 0      |
| AC211473.3 | 7 | CH201-403A8   | 1981 | 0      |
| AC204563.3 | 7 | CH201-389A18  | 1929 | 0      |
| AC197576.3 | 7 | ZMMBBb-100F9  | 1925 | 0      |
| AC206770.3 | 7 | CH201-387G24  | 1921 | 0      |
| AC217998.4 | 7 | ZMMBBb-143L21 | 1894 | 0      |
| AC205690.4 | 7 | CH201-277L16  | 1876 | 0      |
| AC194141.3 | 7 | CH201-24H17   | 1871 | 0      |
| AC191925.3 | 7 | ZMMBBb-444E7  | 1869 | 0      |
| AC194888.3 | 7 | CH201-308D15  | 1867 | 0      |
| AC190851.3 | 7 | CH201-207O4   | 1855 | 0      |
| AC200142.3 | 7 | CH201-46G23   | 1837 | 0      |
| AC203251.3 | 7 | CH201-272F6   | 1829 | 0      |
| AC212455.3 | 7 | CH201-380H23  | 1811 | 0      |
| AC201907.4 | 7 | CH201-51A14   | 1797 | 0      |
| AC208675.3 | 7 | CH201-530I18  | 1790 | 0      |
| AC205311.3 | 7 | ZMMBBb-389M15 | 1783 | 0      |

|            |   |               |      |   |
|------------|---|---------------|------|---|
| AC207650.3 | 7 | CH201-52J12   | 1728 | 0 |
| AC207630.3 | 7 | CH201-13O21   | 1723 | 0 |
| AC199471.4 | 7 | ZMMBBb-495I18 | 1710 | 0 |
| AC196296.3 | 7 | CH201-154C15  | 1700 | 0 |
| AC191735.3 | 7 | ZMMBBb-475C16 | 1689 | 0 |
| AC207542.3 | 7 | CH201-508I10  | 1687 | 0 |
| AC201984.3 | 7 | CH201-529G15  | 1674 | 0 |
| AC234513.1 | 7 | CH201-148B14  | 1663 | 0 |
| AC211314.3 | 7 | ZMMBBb-492C19 | 1644 | 0 |
| AC200233.4 | 7 | CH201-514E5   | 1642 | 0 |
| AC193985.3 | 7 | CH201-219B10  | 1640 | 0 |
| AC198734.3 | 7 | CH201-340F12  | 1638 | 0 |
| AC186784.3 | 7 | CH201-13C18   | 1629 | 0 |
| AC211461.4 | 7 | CH201-142J16  | 1618 | 0 |
| AC213517.4 | 7 | CH201-43D14   | 1608 | 0 |
| AC212733.4 | 7 | CH201-347A21  | 1606 | 0 |
| AC187094.4 | 7 | CH201-180M22  | 1595 | 0 |
| AC220973.3 | 7 | CH201-71K1    | 1590 | 0 |
| AC195399.3 | 7 | ZMMBBb-458K18 | 1582 | 0 |
| AC204917.3 | 7 | CH201-516G19  | 1581 | 0 |
| AC213350.3 | 7 | CH201-144L24  | 1575 | 0 |
| AC209630.2 | 7 | CH201-94B2    | 1572 | 0 |
| AC197553.3 | 7 | CH201-308L17  | 1559 | 0 |
| AC188832.5 | 7 | CH201-527G24  | 1548 | 0 |
| AC191331.3 | 7 | CH201-478E10  | 1544 | 0 |
| AC195138.3 | 7 | CH201-290D2   | 1543 | 0 |
| AC209833.3 | 7 | CH201-74C19   | 1535 | 0 |
| AC187098.4 | 7 | CH201-178C21  | 1532 | 0 |
| AC212583.3 | 7 | CH201-407J1   | 1528 | 0 |
| AC196134.3 | 7 | ZMMBBb-350C2  | 1510 | 0 |
| AC216290.3 | 7 | CH201-542K9   | 1498 | 0 |
| AC205408.2 | 7 | CH201-341E9   | 1485 | 0 |
| AC202971.2 | 7 | CH201-270J2   | 1480 | 0 |
| AC218167.2 | 7 | CH201-70F22   | 1472 | 0 |
| AC208109.2 | 7 | CH201-189B15  | 1462 | 0 |
| AC203031.3 | 7 | CH201-240H23  | 1458 | 0 |
| AC195302.3 | 7 | CH201-299E2   | 1453 | 0 |
| AC205264.3 | 7 | CH201-40G9    | 1445 | 0 |
| AC189761.3 | 7 | CH201-482C4   | 1424 | 0 |
| AC203355.4 | 7 | ZMMBBb-58B23  | 1420 | 0 |
| AC210802.3 | 7 | CH201-69M4    | 1418 | 0 |
| AC193413.3 | 7 | ZMMBBb-106N3  | 1409 | 0 |
| AC196031.3 | 7 | CH201-118F5   | 1398 | 0 |
| AC232240.3 | 7 | ZMMBBb-227E1  | 1371 | 0 |
| AC209710.4 | 7 | CH201-217L19  | 1366 | 0 |
| AC199885.4 | 7 | CH201-482M14  | 1324 | 0 |
| AC208914.3 | 7 | CH201-7O19    | 1308 | 0 |
| AC213628.3 | 7 | CH201-474K16  | 1292 | 0 |
| AC214509.3 | 7 | CH201-304N14  | 1278 | 0 |
| AC231603.2 | 7 | CH201-308A20  | 1274 | 0 |
| AC216042.3 | 7 | CH201-457N9   | 1267 | 0 |
| AC209623.2 | 7 | CH201-132L17  | 1229 | 0 |
| AC205387.3 | 7 | CH201-103M17  | 1112 | 0 |
| AC195322.4 | 7 | ZMMBBb-226D18 | 1099 | 0 |

|            |   |               |      |           |
|------------|---|---------------|------|-----------|
| AC231379.2 | 7 | CH201-10I15   | 1067 | 0         |
| AC198903.2 | 7 | CH201-10A15   | 1032 | 0         |
| AC186785.4 | 7 | CH201-186K1   | 1023 | 0         |
| AC210282.3 | 7 | CH201-120A9   | 949  | 0         |
| AC202032.4 | 7 | CH201-180K11  | 919  | 0         |
| AC213434.3 | 7 | CH201-390C14  | 901  | 0         |
| AC209773.3 | 7 | CH201-118E14  | 888  | 0         |
| AC210164.2 | 7 | CH201-39C1    | 852  | 0         |
| AC203250.3 | 7 | CH201-283K10  | 848  | 0         |
| AC193959.3 | 7 | ZMMBBb-235N22 | 834  | 0         |
| AC217967.3 | 7 | ZMMBBb-331L14 | 812  | 0         |
| AC187079.4 | 7 | CH201-214B7   | 805  | 0         |
| AC207261.4 | 7 | CH201-252J18  | 792  | 0         |
| AC204037.3 | 7 | ZMMBBb-455D8  | 765  | 0         |
| AC199362.5 | 7 | CH201-310E3   | 753  | 0         |
| AC199404.3 | 7 | CH201-204J20  | 733  | 0         |
| AC187778.3 | 7 | CH201-145M9   | 724  | 0         |
| AC196771.3 | 7 | ZMMBBb-17N8   | 700  | 0         |
| AC205131.3 | 7 | CH201-265H18  | 686  | 0         |
| AC199706.4 | 7 | CH201-271L1   | 681  | 0         |
| AC211765.4 | 7 | CH201-112I2   | 677  | 0         |
| AC208639.3 | 7 | CH201-263G14  | 637  | 4.00E-180 |
| AC191571.3 | 7 | CH201-277K3   | 636  | 2.00E-179 |
| AC205516.3 | 7 | CH201-220E2   | 590  | 6.00E-166 |
| AC189799.3 | 7 | CH201-124D18  | 558  | 3.00E-156 |
| AC235532.1 | 7 | CH201-163M18  | 526  | 2.00E-146 |
| AC196198.2 | 8 | CH201-539B3   | 2690 | 0         |
| AC231837.2 | 8 | CH201-278I18  | 2652 | 0         |
| AC199954.4 | 8 | CH201-117L21  | 2610 | 0         |
| AC195151.2 | 8 | CH201-300H4   | 2592 | 0         |
| AC199087.3 | 8 | CH201-197D6   | 2506 | 0         |
| AC211474.3 | 8 | CH201-403G22  | 2414 | 0         |
| AC203285.3 | 8 | CH201-566N4   | 2385 | 0         |
| AC211006.3 | 8 | CH201-198A1   | 2378 | 0         |
| AC194455.3 | 8 | CH201-13N6    | 2302 | 0         |
| AC198927.2 | 8 | ZMMBBb-278I13 | 2145 | 0         |
| AC216793.3 | 8 | ZMMBBb-524J9  | 2073 | 0         |
| AC187287.3 | 8 | CH201-295K17  | 2064 | 0         |
| AC209885.3 | 8 | CH201-329D3   | 2048 | 0         |
| AC204884.3 | 8 | CH201-14M3    | 2033 | 0         |
| AC195852.3 | 8 | ZMMBBb-481H24 | 1981 | 0         |
| AC206698.3 | 8 | CH201-113J4   | 1979 | 0         |
| AC199630.4 | 8 | CH201-169O5   | 1968 | 0         |
| AC193462.3 | 8 | CH201-256K9   | 1959 | 0         |
| AC213530.3 | 8 | CH201-460P14  | 1885 | 0         |
| AC194067.3 | 8 | CH201-454I17  | 1874 | 0         |
| AC194112.3 | 8 | CH201-392L13  | 1873 | 0         |
| AC197902.3 | 8 | CH201-528H18  | 1864 | 0         |
| AC217985.3 | 8 | ZMMBBb-230O19 | 1813 | 0         |

|            |   |               |      |   |
|------------|---|---------------|------|---|
| AC203863.3 | 8 | CH201-157J7   | 1806 | 0 |
| AC187411.4 | 8 | CH201-251P23  | 1797 | 0 |
| AC218035.3 | 8 | ZMMBBb-109K7  | 1792 | 0 |
| AC187556.4 | 8 | CH201-261P11  | 1783 | 0 |
| AC212290.3 | 8 | CH201-3M7     | 1777 | 0 |
| AC193597.2 | 8 | CH201-189H2   | 1739 | 0 |
| AC218910.3 | 8 | ZMMBBb-586M11 | 1714 | 0 |
| AC218166.3 | 8 | CH201-424C22  | 1707 | 0 |
| AC197666.4 | 8 | ZMMBBb-500E1  | 1698 | 0 |
| AC199708.3 | 8 | CH201-148B21  | 1676 | 0 |
| AC204327.3 | 8 | CH201-133I2   | 1673 | 0 |
| AC204012.3 | 8 | CH201-413F8   | 1669 | 0 |
| AC204030.3 | 8 | ZMMBBb-578L21 | 1667 | 0 |
| AC206579.3 | 8 | CH201-461A5   | 1662 | 0 |
| AC202530.3 | 8 | CH201-384D4   | 1654 | 0 |
| AC203999.3 | 8 | CH201-205F4   | 1645 | 0 |
| AC213603.3 | 8 | ZMMBBb-158C19 | 1636 | 0 |
| AC199804.4 | 8 | CH201-180K12  | 1626 | 0 |
| AC194439.3 | 8 | CH201-152O1   | 1624 | 0 |
| AC220958.3 | 8 | ZMMBBb-265A4  | 1615 | 0 |
| AC199186.3 | 8 | CH201-384O20  | 1609 | 0 |
| AC215311.3 | 8 | CH201-204B24  | 1608 | 0 |
| AC205407.3 | 8 | ZMMBBb-120I10 | 1599 | 0 |
| AC199338.4 | 8 | CH201-376L16  | 1591 | 0 |
| AC218037.3 | 8 | CH201-299E17  | 1586 | 0 |
| AC217937.3 | 8 | CH201-297E6   | 1577 | 0 |
| AC186893.4 | 8 | ZMMBBb-637L7  | 1575 | 0 |
| AC206903.3 | 8 | CH201-248D7   | 1570 | 0 |
| AC199939.4 | 8 | CH201-166H1   | 1555 | 0 |
| AC200236.4 | 8 | CH201-463M9   | 1552 | 0 |
| AC194047.3 | 8 | CH201-455H13  | 1548 | 0 |
| AC203171.3 | 8 | CH201-98O9    | 1544 | 0 |
| AC217988.3 | 8 | ZMMBBb-193L6  | 1543 | 0 |
| AC206320.3 | 8 | ZMMBBb-314M3  | 1535 | 0 |
| AC231419.4 | 8 | CH201-262G13  | 1534 | 0 |
| AC204849.3 | 8 | CH201-425E18  | 1532 | 0 |
| AC209737.3 | 8 | CH201-126P5   | 1526 | 0 |
| AC186808.4 | 8 | CH201-384G18  | 1516 | 0 |
| AC225346.3 | 8 | CH201-545J3   | 1514 | 0 |
| AC204359.3 | 8 | CH201-61H3    | 1499 | 0 |
| AC204254.3 | 8 | ZMMBBb-600C1  | 1483 | 0 |
| AC210235.3 | 8 | ZMMBBb-557J15 | 1481 | 0 |
| AC186644.3 | 8 | ZMMBBb-218L14 | 1480 | 0 |
| AC203580.3 | 8 | CH201-182B20  | 1476 | 0 |
| AC203531.3 | 8 | CH201-546E8   | 1469 | 0 |
| AC213902.2 | 8 | CH201-276G22  | 1467 | 0 |
| AC194341.4 | 8 | ZMMBBb-429I10 | 1465 | 0 |
| AC199064.3 | 8 | CH201-378A15  | 1462 | 0 |
| AC197924.3 | 8 | CH201-10F24   | 1460 | 0 |
| AC200182.3 | 8 | CH201-420P20  | 1458 | 0 |
| AC199710.3 | 8 | CH201-130C4   | 1453 | 0 |
| AC186885.3 | 8 | CH201-454I13  | 1436 | 0 |
| AC203894.3 | 8 | CH201-10M17   | 1427 | 0 |
| AC233909.1 | 8 | ZMMBBb-165B4  | 1424 | 0 |

|            |   |               |      |        |
|------------|---|---------------|------|--------|
| AC199830.3 | 8 | CH201-109L20  | 1418 | 0      |
| AC209081.3 | 8 | CH201-492C12  | 1406 | 0      |
| AC199351.3 | 8 | CH201-324H4   | 1404 | 0      |
| AC196690.3 | 8 | CH201-133K19  | 1388 | 0      |
| AC187782.4 | 8 | CH201-162P23  | 1386 | 0      |
| AC195831.3 | 8 | ZMMBBb-566L19 | 1342 | 0      |
| AC187157.4 | 8 | CH201-235F4   | 1339 | 0      |
| AC202455.4 | 8 | CH201-115I1   | 1337 | 0      |
| AC207883.3 | 8 | CH201-66P13   | 1335 | 0      |
| AC197007.3 | 8 | CH201-407D8   | 1328 | 0      |
| AC206218.3 | 8 | CH201-133F5   | 1294 | 0      |
| AC187484.3 | 8 | CH201-245O12  | 1254 | 0      |
| AC194366.3 | 8 | ZMMBBb-563E19 | 1231 | 0      |
| AC183939.3 | 8 | CH201-289I6   | 1222 | 0      |
| AC200421.4 | 8 | CH201-109A3   | 1218 | 0      |
| AC188737.4 | 8 | CH201-213M10  | 1211 | 0      |
| AC195985.3 | 8 | CH201-530C13  | 1180 | 0      |
| AC214115.3 | 8 | CH201-104K9   | 1175 | 0      |
| AC199492.3 | 8 | CH201-23F2    | 1169 | 0      |
| AC199381.4 | 8 | CH201-55L15   | 1146 | 0      |
| AC196179.3 | 8 | CH201-195D15  | 1139 | 0      |
| AC193325.3 | 8 | ZMMBBb-89F14  | 1101 | 0      |
| AC214802.3 | 8 | CH201-112H24  | 1092 | 0      |
| AC187392.3 | 8 | CH201-228B15  | 1085 | 0      |
| AC199011.4 | 8 | CH201-106G19  | 1065 | 0      |
| AC203767.3 | 8 | CH201-380N18  | 1049 | 0      |
| AC199881.4 | 8 | CH201-469D9   | 1007 | 0      |
| AC196676.4 | 8 | ZMMBBb-427M18 | 1005 | 0      |
| AC195927.3 | 8 | ZMMBBb-251K17 | 1003 | 0      |
| AC206188.4 | 8 | CH201-255O14  | 984  | 0      |
| AC201801.4 | 8 | CH201-30F5    | 975  | 0      |
| AC190864.4 | 8 | CH201-146P24  | 940  | 0      |
| AC205406.3 | 8 | ZMMBBb-295P3  | 921  | 0      |
| AC195139.3 | 8 | ZMMBBb-398M3  | 913  | 0      |
| AC202998.3 | 8 | CH201-186M13  | 904  | 0      |
| AC194378.3 | 8 | ZMMBBb-57E15  | 874  | 0      |
| AC200095.4 | 8 | ZMMBBb-411N2  | 857  | 0      |
| AC199943.4 | 8 | CH201-149F1   | 848  | 0      |
| AC199637.3 | 8 | CH201-133C21  | 839  | 0      |
| AC208976.3 | 8 | CH201-70K1    | 827  | 0      |
| AC196068.3 | 8 | CH201-398D1   | 821  | 0      |
| AC195875.2 | 8 | CH201-266M2   | 801  | 0      |
| AC212575.3 | 8 | CH201-340E23  | 800  | 0      |
| AC186429.4 | 8 | CH201-5G16    | 722  | 0      |
| AC233862.1 | 8 | CH201-280O22  | 710  | 0      |
| AC208341.4 | 8 | CH201-99M11   | 695  | 0      |
| AC199207.3 | 8 | CH201-73P4    | 663  | 0      |
|            |   |               |      | 2.00E- |
| AC213643.3 | 8 | CH201-283G4   | 572  | 160    |
| AC203761.3 | 9 | CH201-367C18  | 2686 | 0      |
| AC215875.3 | 9 | CH201-194F24  | 2681 | 0      |
| AC194465.3 | 9 | CH201-122B9   | 2646 | 0      |
| AC206265.3 | 9 | CH201-21L19   | 2520 | 0      |
| AC205252.4 | 9 | CH201-326J23  | 2477 | 0      |



|            |   |               |      |   |
|------------|---|---------------|------|---|
| AC150740.3 | 9 | ZMMBBc157L04  | 2473 | 0 |
| AC196000.1 | 9 | CH201-157L4   | 2468 | 0 |
| AC232230.3 | 9 | ZMMBBb-377I24 | 2387 | 0 |
| AC195905.3 | 9 | ZMMBBb-307G20 | 2223 | 0 |
| AC226253.2 | 9 | CH201-105F4   | 2138 | 0 |
| AC197527.3 | 9 | CH201-358J1   | 2136 | 0 |
| AC149640.5 | 9 | ZMMBBc0218F03 | 2129 | 0 |
| AC213601.3 | 9 | CH201-23G2    | 2104 | 0 |
| AC193773.2 | 9 | CH201-491G3   | 2066 | 0 |
| AC188825.3 | 9 | CH201-186P12  | 2033 | 0 |
| AC211679.4 | 9 | CH201-466F18  | 2006 | 0 |
| AC206598.2 | 9 | CH201-315P21  | 1997 | 0 |
| AC210147.3 | 9 | CH201-447A24  | 1979 | 0 |
| AC196578.2 | 9 | CH201-189E14  | 1977 | 0 |
| AC190675.3 | 9 | CH201-252P14  | 1974 | 0 |
| AC206831.3 | 9 | CH201-344K6   | 1945 | 0 |
| AC212584.3 | 9 | CH201-435A16  | 1912 | 0 |
| AC218951.3 | 9 | ZMMBBb-356H18 | 1907 | 0 |
| AC218019.3 | 9 | CH201-464A11  | 1896 | 0 |
| AC211445.3 | 9 | CH201-374I19  | 1894 | 0 |
| AC196437.3 | 9 | CH201-123C9   | 1887 | 0 |
| AC205249.3 | 9 | CH201-419K14  | 1884 | 0 |
| AC191324.3 | 9 | CH201-149D14  | 1882 | 0 |
| AC216802.3 | 9 | CH201-473L14  | 1876 | 0 |
| AC211738.4 | 9 | CH201-277L22  | 1871 | 0 |
| AC206236.3 | 9 | ZMMBBb-134F2  | 1865 | 0 |
| AC196047.2 | 9 | CH201-489N2   | 1855 | 0 |
| AC210059.3 | 9 | ZMMBBb-245D24 | 1844 | 0 |
| AC203267.3 | 9 | CH201-104J2   | 1842 | 0 |
| AC190553.3 | 9 | CH201-286G14  | 1840 | 0 |
| AC206327.3 | 9 | CH201-97N7    | 1835 | 0 |
| AC208021.3 | 9 | CH201-198B12  | 1822 | 0 |
| AC232233.4 | 9 | ZMMBBb-315G18 | 1817 | 0 |
| AC226681.4 | 9 | CH201-234O24  | 1815 | 0 |
| AC207309.3 | 9 | CH201-6A21    | 1804 | 0 |
| AC226445.2 | 9 | CH201-254D24  | 1801 | 0 |
| AC202398.4 | 9 | CH201-235F15  | 1790 | 0 |
| AC212819.4 | 9 | CH201-292P16  | 1768 | 0 |
| AC207255.3 | 9 | CH201-60C18   | 1764 | 0 |
| AC206626.3 | 9 | ZMMBBb-586B24 | 1752 | 0 |
| AC203956.3 | 9 | CH201-122M1   | 1748 | 0 |
| AC190972.4 | 9 | CH201-475I24  | 1725 | 0 |
| AC210233.3 | 9 | ZMMBBb-574N21 | 1719 | 0 |
| AC191609.3 | 9 | CH201-30K2    | 1716 | 0 |
| AC210314.3 | 9 | CH201-216G13  | 1705 | 0 |
| AC213995.3 | 9 | CH201-181N6   | 1656 | 0 |
| AC204402.3 | 9 | CH201-464F4   | 1629 | 0 |
| AC204874.5 | 9 | CH201-260G3   | 1627 | 0 |
| AC188127.3 | 9 | CH201-135L7   | 1617 | 0 |
| AC209877.3 | 9 | CH201-320C12  | 1597 | 0 |
| AC202130.4 | 9 | CH201-131H4   | 1593 | 0 |
| AC211353.4 | 9 | CH201-286P7   | 1579 | 0 |
| AC211152.4 | 9 | CH201-236H11  | 1577 | 0 |
| AC215605.3 | 9 | CH201-280E19  | 1573 | 0 |

|            |    |               |      |           |
|------------|----|---------------|------|-----------|
| AC211262.4 | 9  | CH201-89A16   | 1572 | 0         |
| AC197224.3 | 9  | ZMMBBb-565P1  | 1564 | 0         |
| AC211419.3 | 9  | CH201-359A14  | 1563 | 0         |
| AC209959.3 | 9  | CH201-419L5   | 1548 | 0         |
| AC212827.3 | 9  | CH201-249N4   | 1539 | 0         |
| AC217932.3 | 9  | ZMMBBb-321M22 | 1537 | 0         |
| AC211649.3 | 9  | ZMMBBb-494K8  | 1532 | 0         |
| AC217047.3 | 9  | CH201-27A1    | 1526 | 0         |
| AC190743.3 | 9  | CH201-171N8   | 1525 | 0         |
| AC211683.4 | 9  | CH201-436G2   | 1516 | 0         |
| AC211648.3 | 9  | ZMMBBb-396F20 | 1508 | 0         |
| AC210259.3 | 9  | CH201-69J21   | 1505 | 0         |
| AC210307.3 | 9  | CH201-247C24  | 1496 | 0         |
| AC190587.3 | 9  | CH201-274A22  | 1494 | 0         |
| AC213896.3 | 9  | CH201-137J14  | 1474 | 0         |
| AC197011.4 | 9  | ZMMBBb-142K15 | 1472 | 0         |
| AC231427.4 | 9  | CH201-449M15  | 1471 | 0         |
| AC187215.4 | 9  | ZMMBBb-129P12 | 1463 | 0         |
| AC190857.3 | 9  | CH201-197I21  | 1456 | 0         |
| AC233929.1 | 9  | ZMMBBb-397A10 | 1453 | 0         |
| AC212099.4 | 9  | CH201-479J16  | 1443 | 0         |
| AC231750.1 | 9  | CH201-284H20  | 1442 | 0         |
| AC208905.3 | 9  | CH201-225I14  | 1440 | 0         |
| AC216786.3 | 9  | CH201-143N23  | 1438 | 0         |
| AC234108.2 | 9  | CH201-469K10  | 1431 | 0         |
| AC210256.3 | 9  | CH201-82K8    | 1420 | 0         |
| AC204410.3 | 9  | CH201-36J14   | 1395 | 0         |
| AC215226.3 | 9  | CH201-114F7   | 1371 | 0         |
| AC221023.3 | 9  | CH201-24E16   | 1254 | 0         |
| AC210239.3 | 9  | ZMMBBb-386F5  | 1238 | 0         |
| AC206168.3 | 9  | CH201-366H3   | 1218 | 0         |
| AC210778.4 | 9  | CH201-172E7   | 1196 | 0         |
| AC216186.3 | 9  | CH201-142M12  | 1191 | 0         |
| AC197919.2 | 9  | CH201-166G6   | 1177 | 0         |
| AC225337.3 | 9  | CH201-557A22  | 1157 | 0         |
| AC203571.3 | 9  | ZMMBBb-17F3   | 1139 | 0         |
| AC221009.3 | 9  | CH201-51L6    | 1128 | 0         |
| AC234161.1 | 9  | CH201-263E21  | 975  | 0         |
| AC215193.3 | 9  | CH201-182B5   | 951  | 0         |
| AC211183.3 | 9  | CH201-323F15  | 944  | 0         |
| AC225716.2 | 9  | ZMMBBb-331J20 | 937  | 0         |
| AC211394.4 | 9  | CH201-234P9   | 931  | 0         |
| AC225812.3 | 9  | CH201-65G20   | 904  | 0         |
| AC191616.3 | 9  | CH201-321F22  | 827  | 0         |
| AC204886.3 | 9  | CH201-140E11  | 780  | 0         |
| AC197717.3 | 9  | CH201-44L6    | 731  | 0         |
| AC214135.2 | 9  | CH201-266C20  | 717  | 0         |
| AC199942.3 | 9  | CH201-150J14  | 684  | 0         |
| AC208971.3 | 9  | CH201-222N21  | 639  | 1.00E-180 |
| AC208232.4 | 9  | ZMMBBb-181E21 | 576  | 1.00E-161 |
| AC208677.3 | 10 | CH201-553K13  | 2699 | 0         |
| AC203841.3 | 10 | CH201-268K18  | 2664 | 0         |

|            |    |               |      |   |
|------------|----|---------------|------|---|
| AC208110.2 | 10 | CH201-18D5    | 2621 | 0 |
| AC200284.4 | 10 | CH201-516D12  | 2536 | 0 |
| AC198377.3 | 10 | CH201-232H7   | 2439 | 0 |
| AC203084.4 | 10 | CH201-532P19  | 2280 | 0 |
| AC188033.3 | 10 | ZMMBBb-357L6  | 2127 | 0 |
| AC188966.3 | 10 | CH201-214M1   | 2039 | 0 |
| AC219181.2 | 10 | Z_AI-1189A20  | 2035 | 0 |
| AC190575.3 | 10 | CH201-27M7    | 2019 | 0 |
| AC218914.3 | 10 | CH201-32L22   | 1979 | 0 |
| AC198765.3 | 10 | CH201-403O11  | 1970 | 0 |
| AC196776.3 | 10 | CH201-408E22  | 1945 | 0 |
| AC199180.3 | 10 | CH201-439C11  | 1921 | 0 |
| AC199088.3 | 10 | CH201-173H21  | 1874 | 0 |
| AC193507.3 | 10 | ZMMBBb-438P8  | 1864 | 0 |
| AC193343.3 | 10 | ZMMBBb-270G21 | 1844 | 0 |
| AC199151.3 | 10 | ZMMBBb-106E6  | 1837 | 0 |
| AC213053.3 | 10 | CH201-121H21  | 1831 | 0 |
| AC195953.3 | 10 | ZMMBBb-142H21 | 1815 | 0 |
| AC226367.4 | 10 | CH201-297D6   | 1811 | 0 |
| AC188612.3 | 10 | CH201-189C20  | 1777 | 0 |
| AC190867.3 | 10 | CH201-28N20   | 1768 | 0 |
| AC200226.3 | 10 | CH201-542G14  | 1755 | 0 |
| AC206688.3 | 10 | CH201-206K22  | 1741 | 0 |
| AC195594.3 | 10 | CH201-265N24  | 1710 | 0 |
| AC209069.3 | 10 | CH201-373G20  | 1680 | 0 |
| AC209426.3 | 10 | CH201-132L11  | 1676 | 0 |
| AC200047.3 | 10 | CH201-415G21  | 1667 | 0 |
| AC194165.3 | 10 | CH201-253C1   | 1651 | 0 |
| AC219001.3 | 10 | ZMMBBb-434B2  | 1635 | 0 |
| AC209871.3 | 10 | CH201-177H12  | 1631 | 0 |
| AC195886.3 | 10 | ZMMBBb-308C12 | 1627 | 0 |
| AC200053.4 | 10 | CH201-336K5   | 1618 | 0 |
| AC191315.2 | 10 | CH201-31D14   | 1617 | 0 |
| AC225362.3 | 10 | CH201-517I13  | 1613 | 0 |
| AC193373.3 | 10 | ZMMBBb-545P14 | 1609 | 0 |
| AC210953.3 | 10 | CH201-16G19   | 1604 | 0 |
| AC202948.4 | 10 | CH201-293J1   | 1600 | 0 |
| AC204561.3 | 10 | CH201-399A8   | 1595 | 0 |
| AC199387.4 | 10 | CH201-286A7   | 1584 | 0 |
| AC197899.3 | 10 | ZMMBBb-460B18 | 1582 | 0 |
| AC190593.4 | 10 | ZMMBBb-161H6  | 1581 | 0 |
| AC193460.2 | 10 | CH201-383L19  | 1579 | 0 |
| AC200045.4 | 10 | CH201-447G15  | 1577 | 0 |
| AC214237.3 | 10 | CH201-289P15  | 1573 | 0 |
| AC211634.4 | 10 | CH201-530J16  | 1572 | 0 |
| AC198290.3 | 10 | CH201-210M14  | 1568 | 0 |
| AC201814.4 | 10 | CH201-22C9    | 1555 | 0 |
| AC198726.3 | 10 | CH201-184H22  | 1550 | 0 |
| AC206286.3 | 10 | CH201-206O19  | 1546 | 0 |
| AC204271.3 | 10 | CH201-525K24  | 1543 | 0 |
| AC200039.4 | 10 | CH201-525K14  | 1537 | 0 |
| AC199148.4 | 10 | CH201-523G10  | 1535 | 0 |
| AC194430.3 | 10 | CH201-156B23  | 1532 | 0 |
| AC232293.3 | 10 | ZMMBBb-115B18 | 1528 | 0 |

|            |         |                 |      |        |
|------------|---------|-----------------|------|--------|
| AC197223.2 | 10      | ZMMBBb-539C18   | 1507 | 0      |
| AC202433.4 | 10      | CH201-321L9     | 1505 | 0      |
| AC188195.2 | 10      | CH201-130C8     | 1499 | 0      |
| AC203570.4 | 10      | CH201-562P22    | 1489 | 0      |
| AC199874.4 | 10      | CH201-417I20    | 1485 | 0      |
| AC202081.2 | 10      | CH201-42B20     | 1483 | 0      |
| AC198394.3 | 10      | CH201-176D16    | 1481 | 0      |
| AC189776.3 | 10      | CH201-162F8     | 1478 | 0      |
| AC204317.4 | 10      | CH201-248C1     | 1465 | 0      |
| AC190646.3 | 10      | ZMMBBb-215E20   | 1463 | 0      |
| AC203405.3 | 10      | CH201-47M2      | 1453 | 0      |
| AC199595.4 | 10      | CH201-242B13    | 1449 | 0      |
| AC197249.3 | 10      | CH201-44A19     | 1445 | 0      |
| AC211693.5 | 10      | CH201-71F20     | 1442 | 0      |
| AC205135.3 | 10      | CH201-243M2     | 1433 | 0      |
| AC202091.4 | 10      | CH201-548I19    | 1429 | 0      |
| AC214293.1 | 10      | CH201-468P1     | 1425 | 0      |
| AC210671.4 | 10      | CH201-95D24     | 1420 | 0      |
| AC195983.3 | 10      | CH201-508J23    | 1406 | 0      |
| AC213850.3 | 10      | CH201-544A15    | 1404 | 0      |
| AC198507.4 | 10      | CH201-215J21    | 1379 | 0      |
| AC201829.3 | 10      | CH201-132D23    | 1359 | 0      |
| AC206544.2 | 10      | CH201-88I2      | 1339 | 0      |
| AC207749.2 | 10      | CH201-396E17    | 1330 | 0      |
| AC204873.3 | 10      | CH201-28M18     | 1324 | 0      |
| AC188843.3 | 10      | ZMMBBb-333D14   | 1319 | 0      |
| AC203305.3 | 10      | CH201-69H4      | 1306 | 0      |
| AC200551.4 | 10      | CH201-469G18    | 1301 | 0      |
| AC200043.3 | 10      | CH201-463I11    | 1287 | 0      |
| AC212107.3 | 10      | CH201-470A21    | 1236 | 0      |
| AC203357.3 | 10      | ZMMBBb-5O14     | 1186 | 0      |
| AC218151.3 | 10      | ZMMBBb-371B3    | 1182 | 0      |
| AC226335.2 | 10      | CH201-544E19    | 1169 | 0      |
| AC205465.3 | 10      | CH201-539D8     | 1162 | 0      |
| AC190713.3 | 10      | CH201-24I17     | 1104 | 0      |
| AC197742.3 | 10      | CH201-111F10    | 1081 | 0      |
| AC203884.3 | 10      | CH201-119F15    | 1052 | 0      |
| AC188132.3 | 10      | CH201-2E13      | 1049 | 0      |
| AC189067.4 | 10      | CH201-203K20    | 1021 | 0      |
| AC215988.3 | 10      | CH201-482B11    | 1020 | 0      |
| AC199495.3 | 10      | CH201-172G12    | 930  | 0      |
| AC195870.3 | 10      | ZMMBBb-351K18   | 908  | 0      |
| AC214835.3 | 10      | CH201-28C21     | 897  | 0      |
| AC210974.4 | 10      | CH201-333B8     | 877  | 0      |
| AC217945.4 | 10      | CH201-21I18     | 863  | 0      |
| AC225637.2 | 10      | ZMMBBb-157E24   | 832  | 0      |
| AC218152.3 | 10      | ZMMBBb-377K16   | 825  | 0      |
| AC190752.2 | 10      | ZMMBBb-336N23   | 816  | 0      |
| AC214775.3 | 10      | CH201-171J22    | 791  | 0      |
| AC198227.4 | 10      | CH201-120B15    | 641  | 0      |
|            |         |                 |      | 4.00E- |
| AC199353.3 | 10      | CH201-323A9     | 578  | 162    |
| AC155512.2 | unknown | ZMMBBc0055E07   | 2917 | 0      |
| AC204592.3 | unknown | CH201-294A22... | 2702 | 0      |

|            |         |                 |      |   |
|------------|---------|-----------------|------|---|
| AC155486.2 | unknown | ZMMBBc0011K20   | 2643 | 0 |
| AC212470.3 | unknown | CH201-483N20... | 2612 | 0 |
| AC206158.3 | unknown | CH201-290I7...  | 2605 | 0 |
| AC203676.3 | unknown | CH201-172K6...  | 2589 | 0 |
| AC213049.3 | unknown | CH201-159N3...  | 2509 | 0 |
| AC199193.3 | unknown | CH201-358K3...  | 2498 | 0 |
| AC155598.2 | unknown | ZMMBBc0216O09   | 2397 | 0 |
| AC149309.3 | unknown | SEQUENCING      | 2387 | 0 |
| AC155421.2 | unknown | ZMMBBb0216P16   | 2145 | 0 |
| AC190949.3 | unknown | CH201-42G4      | 2132 | 0 |
| AC155602.2 | unknown | ZMMBBc0232P14   | 2129 | 0 |
| AC155455.2 | unknown | ZMMBBb0403C10   | 2122 | 0 |
| AC155585.2 | unknown | ZMMBBc0197G07   | 2075 | 0 |
| AC155403.2 | unknown | ZMMBBb0174A23   | 2049 | 0 |
| AC206844.3 | unknown | CH201-527K11... | 2046 | 0 |
| AC183929.4 | unknown | ZMMBBb-519D2... | 2001 | 0 |
| AC196157.3 | unknown | CH201-482K24... | 1999 | 0 |
| AC145726.6 | unknown | SEQUENCING      | 1957 | 0 |
| AC221004.3 | unknown | CH201-376C11... | 1939 | 0 |
| AC212820.3 | unknown | CH201-296L4...  | 1916 | 0 |
| AC205081.3 | unknown | CH201-102D23... | 1909 | 0 |
| AC155616.2 | unknown | ZMMBBc0316H01   | 1907 | 0 |
| AC148100.2 | unknown | SEQUENCING      | 1896 | 0 |
| AC195986.3 | unknown | CH201-537E16... | 1867 | 0 |
| AC145224.7 | unknown | SEQUENCING      | 1860 | 0 |
| AC145730.8 | unknown | SEQUENCING      | 1858 | 0 |
| AC196113.1 | unknown | CH201-94P16...  | 1853 | 0 |
| AC218006.3 | unknown | ZMMBBb-119C2... | 1824 | 0 |
| AC213396.3 | unknown | CH201-7110      | 1811 | 0 |
| AC191318.3 | unknown | CH201-286F24... | 1793 | 0 |
| AC197256.3 | unknown | CH201-250P13... | 1774 | 0 |
| AC155590.2 | unknown | ZMMBBc0203A06   | 1750 | 0 |
| AC226576.2 | unknown | CH201-567O7...  | 1727 | 0 |
| AC155501.2 | unknown | ZMMBBc0030K02   | 1716 | 0 |
| AC219037.4 | unknown | ZMMBBb-154F2... | 1701 | 0 |
| AC198126.3 | unknown | CH201-393E23... | 1692 | 0 |
| AC191702.3 | unknown | CH201-322B6...  | 1682 | 0 |
| AF546186.1 | unknown | SEQUENCING      | 1680 | 0 |
| AC200694.4 | unknown | CH201-480G16... | 1676 | 0 |
| AC191431.2 | unknown | ZMMBBb-631G1... | 1658 | 0 |
| AC233857.1 | unknown | CH201-212J6...  | 1656 | 0 |
| AC155390.2 | unknown | ZMMBBb0156A04   | 1647 | 0 |
| AC201883.4 | unknown | CH201-470A22... | 1636 | 0 |
| AC209705.3 | unknown | CH201-154M18... | 1633 | 0 |
| AC199391.3 | unknown | CH201-279A17... | 1631 | 0 |
| AC155545.2 | unknown | ZMMBBc0154D18   | 1624 | 0 |
| AC188773.4 | unknown | CH201-175I7...  | 1618 | 0 |
| AC199483.3 | unknown | CH201-324B14... | 1608 | 0 |
| AC199626.4 | unknown | CH201-273K20... | 1606 | 0 |
| AC205628.3 | unknown | CH201-119B2...  | 1602 | 0 |
| AC155542.2 | unknown | ZMMBBc0151N07   | 1595 | 0 |
| AC204535.3 | unknown | ZMMBBb-141I1... | 1591 | 0 |
| AC226607.2 | unknown | CH201-576G21... | 1590 | 0 |
| AC155508.2 | unknown | ZMMBBc0048J04   | 1577 | 0 |

|             |         |                           |      |   |
|-------------|---------|---------------------------|------|---|
| AC155444.2  | unknown | ZMMBBb0290C08             | 1570 | 0 |
| AC199775.1  | unknown | CH201-85K4                | 1568 | 0 |
| AC155441.1  | unknown | ZMMBBb0281D14             | 1564 | 0 |
| AC233910.1  | unknown | ZMMBBb-167E1...           | 1559 | 0 |
| AC200608.4  | unknown | CH201-463E19...           | 1557 | 0 |
| AC198396.3  | unknown | CH201-158H8...            | 1550 | 0 |
| AC155388.2  | unknown | ZMMBBb0152G10             | 1546 | 0 |
| AC148109.2  | unknown | SEQUENCING                | 1543 | 0 |
| AC155633.2  | unknown | ZMMBBc0545P17             | 1535 | 0 |
| AC145471.11 | unknown | SEQUENCING                | 1534 | 0 |
| AC155454.2  | unknown | ZMMBBb0399J23             | 1532 | 0 |
| AC215873.3  | unknown | CH201-205B17...           | 1526 | 0 |
| AC155564.2  | unknown | ZMMBBc0171N08             | 1525 | 0 |
| AC183933.2  | unknown | ZMMBBb-232P7...           | 1510 | 0 |
| AC205112.4  | unknown | CH201-425K24...           | 1503 | 0 |
| AC196070.3  | unknown | CH201-401N14...           | 1498 | 0 |
| AC155625.2  | unknown | ZMMBBc0413I22             | 1485 | 0 |
| AC155536.2  | unknown | ZMMBBc0137O11             | 1472 | 0 |
| AC155586.2  | unknown | ZMMBBc0197I21             | 1469 | 0 |
| AC166638.1  | unknown | ZMMBBb0172I01             | 1465 | 0 |
| AC205386.3  | unknown | CH201-105N10...           | 1460 | 0 |
| AC197544.3  | unknown | CH201-388C5...            | 1456 | 0 |
| AC193586.2  | unknown | CH201-42C14...            | 1454 | 0 |
| AC214670.3  | unknown | CH201-489D13...           | 1451 | 0 |
| AC205258.3  | unknown | CH201-67B17...            | 1449 | 0 |
| AC187839.5  | unknown | ZMMBBb-561L2...           | 1445 | 0 |
| AC195794.3  | unknown | CH201-215N18...           | 1418 | 0 |
| AC149817.2  | unknown | SEQUENCING                | 1413 | 0 |
| AC155404.2  | unknown | ZMMBBb0179C12             | 1393 | 0 |
| AC155440.2  | unknown | ZMMBBb0275E09             | 1391 | 0 |
| AC155597.2  | unknown | ZMMBBc0216K08             | 1364 | 0 |
| AC155481.2  | unknown | ZMMBBc0007O19             | 1308 | 0 |
| AC145262.7  | unknown | SEQUENCING                | 1301 | 0 |
| AC155408.2  | unknown | ZMMBBb0188F23             | 1258 | 0 |
| AC182423.2  | unknown | CH201-125K21              | 1251 | 0 |
| AC155555.2  | unknown | ZMMBBc0162M09             | 1204 | 0 |
| AC214831.3  | unknown | CH201-197E10...           | 1097 | 0 |
| AC225309.2  | unknown | CH201-64C1                | 1031 | 0 |
| AC155619.2  | unknown | ZMMBBc0347P15             | 1023 | 0 |
| AC155472.2  | unknown | ZMMBBb0566K20             | 1020 | 0 |
| AC155445.2  | unknown | ZMMBBb0297M01             | 1007 | 0 |
| AC155546.2  | unknown | ZMMBBc0156B14             | 996  | 0 |
| AC155599.2  | unknown | ZMMBBc0222A18             | 984  | 0 |
| AC155571.2  | unknown | ZMMBBc0174M21             | 955  | 0 |
| AC155400.2  | unknown | ZMMBBb0169I16             | 901  | 0 |
| AC155399.2  | unknown | ZMMBBb0166K21             | 895  | 0 |
| AC155631.2  | unknown | ZMMBBc0497G24             | 888  | 0 |
| AC155374.2  | unknown | ZMMBBb0121F22             | 883  | 0 |
| AC182104.4  | unknown | gnl WUGSC ZMMBBb-<br>2... | 868  | 0 |
| AC155489.2  | unknown | ZMMBBc0015G19             | 834  | 0 |
| AC196436.3  | unknown | CH201-129D21...           | 823  | 0 |
| AC147603.5  | unknown | SEQUENCING                | 814  | 0 |
| AC199366.3  | unknown | CH201-306L8...            | 789  | 0 |

|            |         |                 |     |           |
|------------|---------|-----------------|-----|-----------|
| AC155495.2 | unknown | ZMMBBc0026E06   | 756 | 0         |
| AC196065.3 | unknown | CH201-390F15... | 744 | 0         |
| AC197348.3 | unknown | CH201-307I14... | 646 | 0         |
| AC155573.2 | unknown | ZMMBBc0177D20   | 643 | 0         |
| AC155549.2 | unknown | ZMMBBc0157G16   | 636 | 2.00E-179 |
| AC155494.2 | unknown | ZMMBBc0022M14   | 621 | 3.00E-175 |
| AC187919.5 | unknown | ZMMBBb-157E2... | 545 | 2.00E-152 |

**B. Helitrons in the *Hel1\_106* subfamily containing fragments of a *Cellulose Synthase-1* gene**

| Accession  | Chromosome | BAC clone    | Score | E-value |
|------------|------------|--------------|-------|---------|
| AC190859.3 | 1          | ZMMBBb-467F5 | 7180  | 0       |
| AC209213.4 | 1          | CH201-71N17  | 6563  | 0       |
| AC214527.3 | 1          | CH201-451G20 | 6551  | 0       |
| AC198412.3 | 1          | CH201-251K7  | 6545  | 0       |
| AC186009.3 | 1          | ZMMBBb-255M4 | 6509  | 0       |
| AC185519.3 | 1          | ZMMBBb-112E7 | 6451  | 0       |
| AC214520.3 | 1          | CH201-340K17 | 5451  | 0       |
| AC185604.3 | 1          | ZMMBBb-382I1 | 4886  | 0       |
| AC196435.2 | 1          | CH201-127I16 | 3887  | 0       |
| AC209717.4 | 1          | CH201-143F19 | 3541  | 0       |
| AC195125.3 | 1          | CH201-288P6  | 3534  | 0       |
| AC202861.3 | 1          | CH201-403J13 | 3261  | 0       |
| AC196281.3 | 1          | CH201-102K22 | 3023  | 0       |
| AC194419.3 | 1          | CH201-176A7  | 2610  | 0       |
| AC205293.3 | 1          | CH201-127K20 | 1734  | 0       |
| AC212186.3 | 1          | CH201-428P8  | 1665  | 0       |
| AC189076.3 | 1          | CH201-137P22 | 2551  | 0       |
| AC200889.3 | 2          | CH201-187C1  | 6608  | 0       |
| AC191799.3 | 2          | CH201-420L19 | 6448  | 0       |
| AC207196.3 | 2          | CH201-58B14  | 5371  | 0       |
| AC196681.3 | 2          | CH201-438I7  | 4158  | 0       |
| AC206323.3 | 2          | CH201-527H16 | 3106  | 0       |
| AC196686.3 | 2          | CH201-195I7  | 2293  | 0       |
| AC190522.1 | 2          | CH201-147D20 | 2195  | 0       |
| AC191581.3 | 3          | CH201-16K1   | 7162  | 0       |
| AC210738.3 | 3          | CH201-259E17 | 6477  | 0       |
| AC200302.4 | 3          | CH201-324G8  | 6460  | 0       |
| AC211625.4 | 3          | CH201-522I19 | 3526  | 0       |
| AC197350.3 | 3          | CH201-292P4  | 2042  | 0       |
| AC193439.3 | 3          | CH201-297N11 | 1936  | 0       |
| AC209217.3 | 4          | CH201-500D22 | 6574  | 0       |
| AC185121.3 | 4          | CH201-395C1  | 5553  | 0       |
| AC200886.4 | 4          | CH201-227M22 | 5175  | 0       |
| AC198937.4 | 4          | CH201-8P24   | 4956  | 0       |
| AC190897.3 | 4          | CH201-143G13 | 2493  | 0       |
| AC205064.3 | 4          | CH201-87K17  | 2493  | 0       |
| AC203808.4 | 5          | CH201-71A21  | 6545  | 0       |
| AC209748.3 | 5          | CH201-233E19 | 6307  | 0       |

|            |         |               |      |   |
|------------|---------|---------------|------|---|
| AC196028.2 | 5       | CH201-118N18  | 6300 | 0 |
| AC209374.4 | 5       | CH201-252N10  | 6289 | 0 |
| AC195585.3 | 5       | CH201-325E22  | 6056 | 0 |
| AC190970.2 | 5       | CH201-48J17   | 4158 | 0 |
| AC211737.3 | 5       | CH201-24J17   | 3727 | 0 |
| AC203254.3 | 5       | CH201-243A22  | 3377 | 0 |
| AC225820.2 | 5       | CH201-110F10  | 1835 | 0 |
| AC202430.4 | 6       | CH201-467D5   | 6579 | 0 |
| AC203793.3 | 6       | CH201-513O14  | 6560 | 0 |
| AC194886.3 | 6       | CH201-304I19  | 6325 | 0 |
| AC209760.3 | 6       | CH201-262J13  | 5539 | 0 |
| AC220926.3 | 6       | CH201-95N4    | 4132 | 0 |
| AC200734.3 | 6       | CH201-479F8   | 1829 | 0 |
| AC195921.2 | 7       | ZMMBBb-239L13 | 6623 | 0 |
| AC204307.4 | 7       | CH201-69D10   | 6341 | 0 |
| AC207655.2 | 7       | CH201-335F23  | 5000 | 0 |
| AC212873.3 | 7       | CH201-423L22  | 4782 | 0 |
| AC208109.2 | 7       | CH201-189B15  | 3250 | 0 |
| AC197091.2 | 7       | CH201-207O20  | 2985 | 0 |
| AC200855.3 | 7       | CH201-426O16  | 2296 | 0 |
| AC187149.4 | 7       | CH201-305L10  | 1651 | 0 |
| AC211412.3 | 8       | CH201-339E18  | 6347 | 0 |
| AC204000.3 | 8       | CH201-180C16  | 3892 | 0 |
| AC215231.3 | 8       | CH201-3D15    | 2699 | 0 |
| AC203234.4 | 8       | CH201-488N7   | 2031 | 0 |
| AC211422.4 | 9       | ZMMBBb-412A12 | 6570 | 0 |
| AC210599.3 | 9       | CH201-4L12    | 6504 | 0 |
| AC211929.3 | 9       | CH201-11F4    | 6497 | 0 |
| AC199959.4 | 9       | CH201-105H10  | 6405 | 0 |
| AC203812.3 | 9       | CH201-58K17   | 3508 | 0 |
| AC212020.4 | 9       | CH201-87H1    | 3505 | 0 |
| AC211353.4 | 9       | CH201-286P7   | 1716 | 0 |
| AC210159.3 | 9       | ZMMBBb-582I21 | 1654 | 0 |
| AC188843.3 | 10      | ZMMBBb-333D14 | 6619 | 0 |
| AC206954.3 | 10      | CH201-299O7   | 6118 | 0 |
| AC199056.2 | 10      | CH201-460E22  | 5775 | 0 |
| AC197275.3 | 10      | CH201-114I15  | 5025 | 0 |
| AC194165.3 | 10      | CH201-253C1   | 3656 | 0 |
| AC198226.3 | 10      | CH201-119N1   | 2305 | 0 |
| AC155404.2 | unknown | ZMMBBb0179C12 | 5355 | 0 |
| AC155613.2 | unknown | ZMMBBc0297N11 | 1936 | 0 |
| AC155631.2 | unknown | ZMMBBc0497G24 | 5451 | 0 |
| AC187898.4 | unknown | CH201-130K17  | 4291 | 0 |
| AC187919.5 | unknown | ZMMBBb-157E2  | 4132 | 0 |
| AC198217.4 | unknown | CH201-200F8   | 2452 | 0 |
| AC203049.3 | unknown | CH201-126D2   | 5250 | 0 |
