# Supplementary material
Source: PubMed Central journal article supplement (PMC2785267)
Supplement: 0904742106_ST5_PDF.pdf [file 0904742106_ST5_PDF.pdf]

**Table S5. Maize genes from which *Helitrons* have captured fragments \***

| Accession                      | Gene Name                                                                                                                                                                           | Protein Function                                                                                               | No. <i>Hels</i> | Carried by <i>Helitron</i> |
|--------------------------------|-------------------------------------------------------------------------------------------------------------------------------------------------------------------------------------|----------------------------------------------------------------------------------------------------------------|-----------------|----------------------------|
| <a href="#">NP_179816.1</a>    | AtRABH1d (Arabidopsis Rab GTPase homolog H1d); GTP binding [Arabidopsis thaliana].                                                                                                  | similar to AtRABH1e (Arabidopsis Rab GTPase homolog H1e), GTP binding [Arabidopsis thaliana](TAIR:AT5G10260.1) | 1               | <i>Hel1_275a</i>           |
| <a href="#">NP_173799.1</a>    | ATTPS9 (Arabidopsis thaliana trehalose-phosphatase/synthase 9)                                                                                                                      | gene="ATTPS9"                                                                                                  | 1               | <i>Hel1_205a</i>           |
| <a href="#">NP_194881.2</a>    | binding / catalytic/ coenzyme binding [Arabidopsis thaliana].                                                                                                                       | locus_tag="AT4G31530                                                                                           |                 | <i>Hel1_309a</i>           |
| <a href="#">NP_173499.1</a>    | calcium-binding EF hand family protein [Arabidopsis thaliana].                                                                                                                      | similar to calcium-binding EF hand family protein [Arabidopsis thaliana] (TAIR:AT1G21630.1)                    | 1               | <i>Hel1_219a</i>           |
| <a href="#">NP_001106236.1</a> | diacylglycerol kinase 2 [Zea mays].                                                                                                                                                 | gene="LOC100127508"                                                                                            | 1               | <i>Hel1_203a</i>           |
| <a href="#">NP_001105049.1</a> | D-type cyclin [Zea mays].                                                                                                                                                           | gene="cycD1"                                                                                                   | 1               | <i>Hel1_205a</i>           |
| <a href="#">NP_001077483.1</a> | elongation factor 1-alpha / EF-1-alpha [Arabidopsis thaliana].                                                                                                                      | Identical to Elongation factor 1-alpha (A4) [Arabidopsis Thaliana] (GB:P13905)                                 | 1               | <i>Hel1_288a(3'_1)</i>     |
| <a href="#">ABF96171.1</a>     | expressed protein [Oryza sativa (japonica cultivar-group)].                                                                                                                         | region_name="DUF573"<br>/note="Protein of unknown function, DUF573                                             | 1               | <i>Hel1_259a</i>           |
| <a href="#">ABA10486.1</a>     | faciata 1-like protein [Zea mays].                                                                                                                                                  | faciata 1-like protein                                                                                         | 1               | <i>Hel1_280a</i>           |
| <a href="#">NP_001119099.1</a> | gene_synonym="L23H3.10"; vacuolar ATP synthase, putative / V-ATPase, putative [Arabidopsis thaliana].                                                                               | vacuolar ATP synthase, putative                                                                                | 1               | <i>Hel1_300a</i>           |
| <a href="#">NP_001119263.1</a> | gene_synonym="MKD15.11; succinyl-CoA ligase (GDP-forming) alpha-chain, mitochondrial, putative / succinyl-CoA synthetase, alpha chain, putative / SCS-alpha, putative Arabidopsis]. | Identical to Succinyl-CoA ligase [GDP-forming] subunit alpha-2, mitochondrial precursor [Arabidopsis Thaliana] | 1               | <i>Hel1_286a</i>           |
| <a href="#">NP_001105245.1</a> | gene="aoc1"; allene oxide cyclase1 [Zea mays].                                                                                                                                      | allene oxide cyclase1                                                                                          | 1               | <i>Hel1_255a</i>           |
| <a href="#">NP_001105500.1</a> | gene="apx2; ascorbate peroxidase2 [Zea mays].                                                                                                                                       | cytosolic ascorbate peroxidase                                                                                 | 1               | <i>Hel1_100d</i>           |

|                                |                                                                                                                                    |                                                                                                                                               |    |                               |
|--------------------------------|------------------------------------------------------------------------------------------------------------------------------------|-----------------------------------------------------------------------------------------------------------------------------------------------|----|-------------------------------|
| <a href="#">CAR70073.1</a>     | gene="AsnS2"; asparagine synthetase [Zea mays].                                                                                    | asparagine synthetase                                                                                                                         | 1  | <i>Hel1_233a(3'_2)</i>        |
| <a href="#">NP_566305.1</a>    | gene="ATCHIP/CHIP"; ATCHIP/CHIP (CARBOXYL TERMINUS OF HSC70-INTERACTING PROTEIN); ubiquitin-protein ligase [Arabidopsis thaliana]. | ubiquitin-protein ligase                                                                                                                      | 1  | <i>Hel1_232a</i>              |
| <a href="#">YP_899414.1</a>    | gene="atpB"; ATP synthase CF1 beta subunit [Sorghum bicolor].                                                                      | ATP synthase CF1 beta subunit                                                                                                                 | 1  | <i>Hel1_240a(3'_2)</i>        |
| <a href="#">NP_001105906.1</a> | gene="CCamK"; putative calcium/calmodulin dependent protein kinase [Zea mays].                                                     | putative calcium/calmodulin dependent protein kinase                                                                                          | 1  | <i>Hel1_271a</i>              |
| <a href="#">NP_001105685.1</a> | gene="ccp1; cysteine protease1 [Zea mays]                                                                                          | cysteine proteinase; pZSS5; PCO074362; thp*-D45402; thp*-X82185; PCO074362_ov; PCO074362(205); thiol protease X82185; thiol protease -D45402. | 6  | <i>Hel1_100a-e; Hel1_209a</i> |
| <a href="#">NP_001104954.1</a> | gene="CesA-1"; cellulose synthase-1 [Zea mays].                                                                                    | cellulose synthase-1                                                                                                                          | 26 | <i>Hel1_106a-z</i>            |
| <a href="#">NP_001104957.1</a> | gene="cesa7"; cellulose synthase7 [Zea mays].                                                                                      | cellulose synthase7                                                                                                                           | 1  | <i>Hel1_210a</i>              |
| <a href="#">NP_194159.1</a>    | gene="CPHSC70-1"; CPHSC70-1 (chloroplast heat shock protein 70-1); ATP binding / unfolded protein binding [Arabidopsis thaliana].  | chloroplast heat shock protein 70-1                                                                                                           | 1  | <i>Hel1_280a</i>              |
| <a href="#">NP_001105387.1</a> | gene="CYCZM2W"; type A-like cyclin [Zea mays].                                                                                     | type A-like cyclin                                                                                                                            | 1  | <i>Hel1_270a</i>              |
| <a href="#">NP_192402.1</a>    | gene="DES-1-LIKE"; DES-1-LIKE (fatty acid desaturase 1-like); oxidoreductase [Arabidopsis thaliana].                               | DES-1-LIKE (fatty acid desaturase 1-like); oxidoreductase                                                                                     | 1  | <i>Hel1_300a</i>              |
| <a href="#">NP_001105598.1</a> | gene="gpm374"; golgi associated protein se-wap41 [Zea mays].                                                                       | golgi associated protein se-wap41                                                                                                             | 3  | <i>Hel1_116a,b,c</i>          |
| <a href="#">NP_001105858.1</a> | gene="HK1b1"; histidine kinase [Zea mays].                                                                                         | histidine kinase                                                                                                                              | 1  | <i>Hel1_229a</i>              |
| <a href="#">NP_001105471.1</a> | gene="hox3"; homeobox3 [Zea mays].                                                                                                 | homeobox3                                                                                                                                     | 1  | <i>Hel1_288a(3'_1)</i>        |
| <a href="#">NP_001105549.1</a> | gene="koln2b(hox)"; Hox2b protein [Zea mays].                                                                                      | Hox2b protein                                                                                                                                 | 3  | <i>Hel1_114a,b,c</i>          |
| <a href="#">NP_001105967.1</a> | gene="LOC100037796"; putative protein kinase [Zea mays].                                                                           | putative protein kinase                                                                                                                       | 1  | <i>Hel1_232a</i>              |
| <a href="#">NP_001106238.1</a> | gene="LOC100127510"; diacylglycerol kinase 3 [Zea mays].                                                                           | diacylglycerol kinase 3                                                                                                                       | 2  | <i>Hel1_118a,b</i>            |

|                                |                                                                                         |                                                        |   |                        |
|--------------------------------|-----------------------------------------------------------------------------------------|--------------------------------------------------------|---|------------------------|
| <a href="#">NP_001123593.1</a> | gene="LOC100170239"; trehalose-6-phosphate synthase [Zea mays].                         | trehalose-6-phosphate synthase                         | 1 | <i>Hel1_283a</i>       |
| <a href="#">NP_001123601.1</a> | gene="LOC100170248"; hexose transporter [Zea mays].                                     | hexose transporter                                     | 1 | <i>Hel1_263a</i>       |
| <a href="#">NP_001130200.1</a> | gene="LOC100191294"; hypothetical protein LOC100191294 [Zea mays].                      | hypothetical protein LOC100191294                      | 1 | <i>Hel1_297a(5'_2)</i> |
| <a href="#">NP_001105202.1</a> | gene="LOC542099"; cold acclimation protein COR413-PM1 [Zea mays].                       | cold acclimation protein COR413-PM1                    | 1 | <i>Hel1_283a</i>       |
| <a href="#">NP_001105252.1</a> | gene="LOC542160"; 26S proteasome regulatory complex ATPase RPT3 [Zea mays].             | 26S proteasome regulatory complex ATPase RPT3          | 1 | <i>Hel1_223a</i>       |
| <a href="#">NP_001105413.1</a> | gene="LOC542367"; GADPH (AA 1-337) [Zea mays].                                          | Glyceraldehyde-3-phosphate dehydrogenase, cytosolic 1" | 1 | <i>Hel1_218a</i>       |
| <a href="#">NP_001105460.1</a> | gene="LOC542424"; gamma-tubulin [Zea mays].                                             | gamma-tubulin                                          |   | <i>Hel1_309a</i>       |
| <a href="#">NP_001105635.1</a> | gene="LOC542641"; 40S ribosomal protein S24 [Zea mays].                                 | 40S ribosomal protein S24                              | 1 | <i>Hel1_244a(5'_1)</i> |
| <a href="#">NP_001105869.1</a> | gene="LOC732779"; pentatricopeptide repeat protein [Zea mays].                          | pentatricopeptide repeat protein [Zea mays].           | 2 | <i>Hel1_108a,b</i>     |
| <a href="#">NP_001105908.1</a> | gene="LOC732827"; putative wound responsive protein [Zea mays].                         | putative wound responsive protein [Zea mays].          | 1 | <i>Hel1_114d</i>       |
| <a href="#">CAD59590.1</a>     | gene="mdr3"; MDR-like ABC transporter [Oryza sativa (japonica cultivar-group)].         | MDR-like ABC transporter                               | 1 | <i>Hel1_210a</i>       |
| <a href="#">NP_001105313.1</a> | gene="me3"; NADP malic enzyme3 [Zea mays].                                              | NADP malic enzyme3                                     | 1 | <i>Hel1_270a</i>       |
| <a href="#">NP_001105470.1</a> | gene="mha2"; plasma-membrane H+ATPase2 [Zea mays].                                      | plasma-membrane H+ATPase2                              | 1 | <i>Hel1_298a</i>       |
| <a href="#">BAD17149.1</a>     | gene="OJ1448_G06.23"; kinesin motor protein 1-like [Oryza sativa Japonica Group].       | kinesin motor protein 1-like                           | 1 | <i>Hel1_301a</i>       |
| <a href="#">AAK63878.1</a>     | gene="OSJNBa0030B02.16"; Putative salt-inducible protein [Oryza sativa].                | Putative salt-inducible protein                        | 1 | <i>Hel1_284a</i>       |
| <a href="#">AAO17020.1</a>     | gene="OSJNBa0090O10.10"; Hypothetical protein [Oryza sativa (japonica cultivar-group)]. | Hypothetical protein                                   | 5 | <i>Hel1_121a-e</i>     |
| <a href="#">BAD35894.1</a>     | gene="P0664C05.15; putative homeobox [Oryza sativa Japonica Group]                      | putative homeobox [Oryza sativa Japonica Group]        | 1 | <i>Hel1_100f</i>       |
| <a href="#">CAA10889.1</a>     | gene="PARP"; poly(ADP-ribose) polymerase [Zea mays].                                    | poly(ADP-ribose) polymerase                            | 1 | <i>Hel1_300a</i>       |

|                                |                                                                                                  |                                                         |   |                                                       |
|--------------------------------|--------------------------------------------------------------------------------------------------|---------------------------------------------------------|---|-------------------------------------------------------|
| <a href="#">NP_001105763.1</a> | gene="PDIL1-5"; protein disulfide isomerase [Zea mays].                                          | gene="PDIL1-5"                                          | 1 | <i>Hel1_301a</i>                                      |
| <a href="#">NP_001105762.1</a> | gene="PDIL5-4"; protein disulfide isomerase [Zea mays].                                          | protein disulfide isomerase                             | 1 | <i>Hel1_259a</i>                                      |
| <a href="#">NP_001105381.1</a> | gene="pds1"; phytoene desaturase [Zea mays].                                                     | phytoene desaturase                                     | 1 | <i>Hel1_242a</i>                                      |
| <a href="#">AAP06789.1</a>     | gene="phyB2"; phytochrome B2 apoprotein; PhyB2 [Zea mays].                                       | phytochrome B2 apoprotein                               | 1 | <i>Hel1_245a(3'_1)</i>                                |
| <a href="#">NP_001105570.1</a> | gene="pOMT1"; plastidic 2-oxoglutarate/malate transporter [Zea mays].                            | plastidic 2-oxoglutarate/malate transporter             | 1 | <i>Hel1_227a</i>                                      |
| <a href="#">NP_001104932.1</a> | gene="rpo2"; RNA polymerase2 [Zea mays].                                                         | T7-like RNA polymerase; Rpot; rpo71"                    | 2 | <i>Hel1_103a,b</i>                                    |
| <a href="#">AAQ01754.1</a>     | gene="Smh1"; single myb histone 1 [Zea mays].                                                    | single myb histone                                      | 1 | <i>Hel1_233a(3'_2)</i>                                |
| <a href="#">NP_001105694.1</a> | gene="sps1"; sucrose phosphate synthase1 [Zea mays].                                             | sucrose phosphate synthase1                             | 1 | <i>Hel1_126a</i>                                      |
| <a href="#">NP_001104839.1</a> | gene="sqs1"; squalene synthase1 [Zea mays].                                                      | squalene synthase1                                      | 1 | <i>Hel1_237a(5'_1)</i>                                |
| <a href="#">AAU29331.1</a>     | gene="srp30"; ASF/SF2-like pre-mRNA splicing factor SRP30 [Zea mays].                            | ASF/SF2-like pre-mRNA splicing factor SRP30 [Zea mays]. | 2 | <i>Hel1_118a,b</i>                                    |
| <a href="#">ABQ23357.1</a>     | gene="sS1"; starch synthase I [Zea mays].                                                        | starch synthase I                                       | 1 | <i>Hel1_251a</i>                                      |
| <a href="#">NP_001104970.1</a> | gene="STM1"; stomatin-like protein [Zea mays].                                                   | stomatin-like protein                                   | 1 | <i>Hel1_225a(5'_1)</i>                                |
| <a href="#">NP_001105843.1</a> | gene="stv2"; sialyltransferase like protein [Zea mays].                                          | sialyltransferase like protein                          | 1 | <i>Hel1_219a</i>                                      |
| <a href="#">AAS77569.1</a>     | gene="sugary2"; starch synthase IIa [Zea mays].                                                  | starch synthase IIa                                     | 1 | <i>Hel1_208a</i>                                      |
| <a href="#">NP_563981.1</a>    | gene="TPL/WSIP1"; TPL/WSIP1 (WUS-INTERACTING PROTEIN 1); protein binding [Arabidopsis thaliana]. | WUS-INTERACTING PROTEIN 1                               | 1 | <i>Hel1_240a(3'_1)</i>                                |
| <a href="#">NP_001105902.1</a> | gene="vp14"; viviparous14 [Zea mays].                                                            | viviparous14                                            | 2 | <i>Hel1_287a; Hel1_295a</i>                           |
| <a href="#">AAL73532.1</a>     | gene="Z195D10.3"; ornithine carbamoyltransferase [Zea mays].                                     | ornithine carbamoyltransferase [Zea mays].              | 6 | <i>Hel1_117a,b; Hel1_123a,b; Hel1_226a; Hel1_279a</i> |
| <a href="#">CAH67432.1</a>     | H0305E08.3 [Oryza sativa (indica cultivar-group)].                                               | Protein of unknown function (DUF295)                    | 1 | <i>Hel1_286a</i>                                      |
| <a href="#">AAQ06294.1</a>     | hypothetical protein [Zea mays].                                                                 | gene="9C20.7"                                           | 2 | <i>Hel1_206a; Hel1_213a</i>                           |
| <a href="#">NP_001130084.1</a> | hypothetical protein LOC100191177 [Zea mays].                                                    | hypothetical protein LOC100191177 [Zea mays].           | 1 | <i>Hel1_300a</i>                                      |

|                                |                                                                           |                                                                                                                                                                                                                                        |   |                        |
|--------------------------------|---------------------------------------------------------------------------|----------------------------------------------------------------------------------------------------------------------------------------------------------------------------------------------------------------------------------------|---|------------------------|
| <a href="#">NP_001130289.1</a> | hypothetical protein LOC100191383 [Zea mays].                             | hypothetical protein LOC100191383 [Zea mays].                                                                                                                                                                                          | 1 | <i>Hel1_301a</i>       |
| <a href="#">NP_001130946.1</a> | hypothetical protein LOC100192051 [Zea mays].                             | hypothetical protein LOC100192051                                                                                                                                                                                                      | 1 | <i>Hel1_287a</i>       |
| <a href="#">NP_001131017.1</a> | hypothetical protein LOC100192365 [Zea mays].                             | hypothetical protein LOC100192365 [Zea mays].                                                                                                                                                                                          | 1 | <i>Hel1_290a</i>       |
| <a href="#">EAY74021.1</a>     | hypothetical protein Osl_001868 [Oryza sativa (indica cultivar-group)].   | Gene Ontology: GO:0016491 oxidoreductase activity                                                                                                                                                                                      | 1 | <i>Hel1_122a</i>       |
| <a href="#">EAY92207.1</a>     | hypothetical protein Osl_013440 [Oryza sativa (indica cultivar-group)].   | similar to RNA sequence, EST similar to Arabidopsis Gene Ontology: GO:0005524 ATP binding                                                                                                                                              | 1 | <i>Hel1_206a</i>       |
| <a href="#">EAY98622.1</a>     | hypothetical protein Osl_019855 [Oryza sativa (indica cultivar-group)].   | hypothetical protein                                                                                                                                                                                                                   | 4 | <i>Hel1_101a,b,c,d</i> |
| <a href="#">EAZ03354.1</a>     | hypothetical protein Osl_024586 [Oryza sativa (indica cultivar-group)].   | hypothetical protein                                                                                                                                                                                                                   | 1 | <i>Hel1_262a</i>       |
| <a href="#">EAZ06454.1</a>     | hypothetical protein Osl_027686 [Oryza sativa (indica cultivar-group)].   | hypothetical protein Osl_027686 [Oryza sativa (indica cultivar-group)].                                                                                                                                                                | 1 | <i>Hel1_284a</i>       |
| <a href="#">EAZ10988.1</a>     | hypothetical protein OsJ_000813 [Oryza sativa (japonica cultivar-group)]. | hypothetical protein OsJ_000813 [Oryza sativa (japonica cultivar-group)].                                                                                                                                                              | 1 | <i>Hel1_250a</i>       |
| <a href="#">EAZ11099.1</a>     | hypothetical protein OsJ_000924 [Oryza sativa (japonica cultivar-group)]. | <399..443 /region_name="DUF1771" /note="Domain of unknown function (DUF1771) 451..523 /region_name="Smr" /note="Smr domain. This family includes the Smr (Small MutS Related) proteins, and the C-terminal region of the MutS2 protein | 2 | <i>Hel1_274a,b</i>     |

|                             |                                                                                                   |                                                                                                                                                                                                            |   |                        |
|-----------------------------|---------------------------------------------------------------------------------------------------|------------------------------------------------------------------------------------------------------------------------------------------------------------------------------------------------------------|---|------------------------|
| <a href="#">EAZ21463.1</a>  | hypothetical protein OsJ_004946 [Oryza sativa (japonica cultivar-group)].                         | 497..759 /region_name="SNF2_N"<br>/note="SNF2 family N-terminal domain. This domain is found in proteins involved in a variety of processes including transcription regulation                             | 1 | <i>Hel1_264a</i>       |
| <a href="#">EAZ16192.1</a>  | hypothetical protein OsJ_030401 [Oryza sativa (japonica cultivar-group)].                         | 168..299 /region_name="35EXOc"<br>/note="3'-5' exonuclease. 350..419 /region_name="HRDC"/note="HRDC domain. The HRDC (Helicase and RNase D C-terminal) domain has a putative role in nucleic acid binding. | 1 | <i>Hel1_275a</i>       |
| <a href="#">AAL73532.1</a>  | hypothetical protein S250_18C08.21 [Sorghum bicolor].                                             | locus_tag="S250_18C08.21"                                                                                                                                                                                  | 1 | <i>Hel1_296a</i>       |
| <a href="#">NP_565023.1</a> | inositol polyphosphate 5-phosphatase, putative [Arabidopsis thaliana].                            | similar to IP5PI (INOSITOL POLYPHOSPHATE 5-PHOSPHATASE I), inositol-polyphosphate 5-phosphatase [Arabidopsis thaliana] (TAIR:AT1G34120.1)                                                                  | 1 | <i>Hel1_263a</i>       |
| <a href="#">EAY88946.1</a>  | locus_tag="OsI_010179"; hypothetical protein OsI_010179 [Oryza sativa (indica cultivar-group)].   | hypothetical protein                                                                                                                                                                                       | 1 | <i>Hel1_208a</i>       |
| <a href="#">EAZ24978.1</a>  | locus_tag="OsJ_008461"; hypothetical protein OsJ_008461 [Oryza sativa (japonica cultivar-group)]. | hypothetical protein                                                                                                                                                                                       | 1 | <i>Hel1_237a(5'_1)</i> |
| <a href="#">EAZ25028.1</a>  | locus_tag="OsJ_008511"; hypothetical protein OsJ_008511 [Oryza sativa (japonica cultivar-group)]. | hypothetical protein OsJ_008511                                                                                                                                                                            | 1 | <i>Hel1_240a(3'_1)</i> |
| <a href="#">EAZ44788.1</a>  | locus_tag="OsJ_028271"; hypothetical protein OsJ_028271 [Oryza sativa (japonica cultivar-group)]. | hypothetical protein                                                                                                                                                                                       | 1 | <i>Hel1_237a(5'_1)</i> |

|                                |                                                              |                                                                                                                                                                       |   |                             |
|--------------------------------|--------------------------------------------------------------|-----------------------------------------------------------------------------------------------------------------------------------------------------------------------|---|-----------------------------|
| <a href="#">AAT42178.1</a>     | locus_tag="Z147J15.26"; putative casein kinase I [Zea mays]. | putative casein kinase I                                                                                                                                              | 1 | <i>Hel1_307a</i>            |
| <a href="#">AAT08010.1</a>     | locus_tag="Z438D03.7"; putative kinase [Zea mays].           | putative kinase                                                                                                                                                       | 2 | <i>Hel1_226a; Hel1_235a</i> |
| <a href="#">NP_001041749.1</a> | Os01g0102500 [Oryza sativa (japonica cultivar-group)].       | Conserved hypothetical protein                                                                                                                                        | 1 | <i>Hel1_297a(5'_1)</i>      |
| <a href="#">NP_001042010.1</a> | Os01g0146700 [Oryza sativa (japonica cultivar-group)].       | Integrase, catalytic region domain containing protein                                                                                                                 | 1 | <i>Hel1_295a</i>            |
| <a href="#">NP_001042146.1</a> | Os01g0171000 [Oryza sativa (japonica cultivar-group)].       | BRASSINOSTEROID INSENSITIVE 1-associated receptor kinase 1 precursor (EC 2.7.1.37) (BRI1-associated receptor kinase 1) (Somatic embryogenesis receptor-like kinase 3) | 1 | <i>Hel1_282a</i>            |
| <a href="#">NP_001042185.1</a> | Os01g0177200 [Oryza sativa (japonica cultivar-group)].       | Ubiquitin-specific protease 14                                                                                                                                        | 1 | <i>Hel1_268a</i>            |
| <a href="#">NP_001042190.1</a> | Os01g0178200 [Oryza sativa (japonica cultivar-group)].       | Protein of unknown function DUF92 family protein                                                                                                                      | 1 | <i>Hel1_291a(5'_1)</i>      |
| <a href="#">NP_001042198.1</a> | Os01g0179300 [Oryza sativa (japonica cultivar-group)].       | Conserved hypothetical protein                                                                                                                                        | 1 | <i>Hel1_308a</i>            |
| <a href="#">NP_001042242.1</a> | Os01g0185900 [Oryza sativa (japonica cultivar-group)].       | WRKY transcription factor 1 (WRKY DNA-binding protein 1) (Zinc-dependent activator protein 1) (Transcription factor ZAP1)                                             | 1 | <i>Hel1_236a</i>            |
| <a href="#">NP_001042313.1</a> | Os01g0200000 [Oryza sativa (japonica cultivar-group)].       | Autophagy 3                                                                                                                                                           | 3 | <i>Hel1_107a,b,c</i>        |
| <a href="#">NP_001042487.1</a> | Os01g0229500 [Oryza sativa (japonica cultivar-group)].       | Thioesterase superfamily domain containing protein                                                                                                                    | 1 | <i>Hel1_233a(3'_2)</i>      |
| <a href="#">NP_001042722.1</a> | Os01g0275600 [Oryza sativa (japonica cultivar-group)].       | Argonaute 4 protein                                                                                                                                                   | 1 | <i>Hel1_308a</i>            |
| <a href="#">NP_001042890.1</a> | Os01g0321300 [Oryza sativa (japonica cultivar-group)].       | SecA protein family protein                                                                                                                                           | 1 | <i>Hel1_296a</i>            |
| <a href="#">NP_001043027.1</a> | Os01g0362100 [Oryza sativa (japonica cultivar-group)].       | Esterase/lipase/thioesterase domain containing protein                                                                                                                | 1 | <i>Hel1_101d</i>            |

|                                |                                                        |                                                                                                                   |   |                        |
|--------------------------------|--------------------------------------------------------|-------------------------------------------------------------------------------------------------------------------|---|------------------------|
| <a href="#">NP_001043123.1</a> | Os01g0496900 [Oryza sativa (japonica cultivar-group)]. | P-type trefoil domain containing protein                                                                          | 1 | <i>Hel1_225a(5'_1)</i> |
| <a href="#">NP_001043227.1</a> | Os01g0526200 [Oryza sativa (japonica cultivar-group)]  | Conserved hypothetical protein supported by AK063442.                                                             | 1 | <i>Hel1_100f</i>       |
| <a href="#">NP_001043259.1</a> | Os01g0536000 [Oryza sativa (japonica cultivar-group)]. | Serine/threonine protein kinase SOS2 (CBL-interacting protein kinase 24)                                          | 1 | <i>Hel1_248a(3'_2)</i> |
| <a href="#">NP_001043317.1</a> | Os01g0554100 [Oryza sativa (japonica cultivar-group)]. | RNA-directed DNA polymerase (Reverse transcriptase) domain containing protein; The start codon is not identified. | 1 | <i>Hel1_285a(3'_2)</i> |
| <a href="#">NP_001043333.1</a> | Os01g0558200 [Oryza sativa (japonica cultivar-group)]. | Glu/Leu/Phe/Val dehydrogenase family protein                                                                      | 1 | <i>Hel1_286a</i>       |
| <a href="#">NP_001043473.1</a> | Os01g0595900 [Oryza sativa (japonica cultivar-group)]. | Cyclin-like F-box domain containing protein                                                                       |   |                        |
| <a href="#">NP_001043564.1</a> | Os01g0613900 [Oryza sativa (japonica cultivar-group)]. | Protein of unknown function UPF0052 and CofD family protein                                                       | 1 | <i>Hel1_254a</i>       |
| <a href="#">NP_001043610.1</a> | Os01g0622300 [Oryza sativa (japonica cultivar-group)]. | Uroporphyrinogen decarboxylase (At3g14930)                                                                        | 1 | <i>Hel1_100e</i>       |
| <a href="#">NP_001043775.1</a> | Os01g0660800 [Oryza sativa (japonica cultivar-group)]. | 3'-5' exonuclease domain containing protein                                                                       | 1 | <i>Hel1_206a</i>       |
| <a href="#">NP_001043847.1</a> | Os01g0675700 [Oryza sativa (japonica cultivar-group)]  | Auxin-responsive protein IAA14 (Indoleacetic acid-induced protein 14) (SOLITARY-ROOT protein)                     | 4 | <i>Hel1_100a,b,c</i>   |
| <a href="#">NP_001043884.1</a> | Os01g0681900 [Oryza sativa (japonica cultivar-group)]. | Glutamate synthase [NADH], chloroplast precursor (EC 1.4.1.14) (NADH- GOGAT)                                      | 1 | <i>Hel1_276a(3'_1)</i> |
| <a href="#">NP_001043991.1</a> | Os01g0701900 [Oryza sativa (japonica cultivar-group)]. | Phosphatidylinositol transfer-like protein III                                                                    | 1 | <i>Hel1_289a</i>       |
| <a href="#">NP_001044072.1</a> | Os01g0716800 [Oryza sativa (japonica cultivar-group)]. | Endonuclease/exonuclease/phosphatase family protein                                                               | 1 | <i>Hel1_251a</i>       |
| <a href="#">NP_001044297.1</a> | Os01g0757800 [Oryza sativa (japonica cultivar-group)]. | UMUC-like DNA-repair protein family protein                                                                       | 1 | <i>Hel1_225a(5'_1)</i> |



|                                |                                                        |                                                                                                |   |                        |
|--------------------------------|--------------------------------------------------------|------------------------------------------------------------------------------------------------|---|------------------------|
| <a href="#">NP_001044360.1</a> | Os01g0767100 [Oryza sativa (japonica cultivar-group)]. | Lysosomal Pro-X carboxypeptidase                                                               | 2 | <i>Hel1_123a,b</i>     |
| <a href="#">NP_001044446.1</a> | Os01g0782200 [Oryza sativa (japonica cultivar-group)]. | Diacylglycerol kinase, catalytic region domain containing protein                              | 1 | <i>Hel1_253a</i>       |
| <a href="#">NP_001044504.1</a> | Os01g0794500 [Oryza sativa (japonica cultivar-group)]. | Protein translation factor SU11 homolog (GOS2 protein)                                         | 3 | <i>Hel1_102a,b,c</i>   |
| <a href="#">NP_001044538.1</a> | Os01g0801100 [Oryza sativa (japonica cultivar-group)]. | Apurinic endonuclease-redox protein (DNA-(apurinic or apyrimidinic site) lyase) (EC 4.2.99.18) | 1 | <i>Hel1_263a</i>       |
| <a href="#">NP_001044618.1</a> | Os01g0816400 [Oryza sativa (japonica cultivar-group)]. | Microtubule bundling polypeptide TMBP200                                                       | 1 | <i>Hel1_291a(5'_2)</i> |
| <a href="#">NP_001044687.1</a> | Os01g0829100 [Oryza sativa (japonica cultivar-group)]. | Major sperm protein domain containing protein                                                  | 1 | <i>Hel1_114d</i>       |
| <a href="#">NP_001044708.1</a> | Os01g0832900 [Oryza sativa (japonica cultivar-group)]. | Ser-Thr protein kinase-like protein                                                            | 1 | <i>Hel1_264a</i>       |
| <a href="#">NP_001044710.1</a> | Os01g0833100 [Oryza sativa (japonica cultivar-group)]. | NLI interacting factor domain containing protein                                               | 1 | <i>Hel1_234a</i>       |
| <a href="#">NP_001044881.1</a> | Os01g0862300 [Oryza sativa (japonica cultivar-group)]. | Sorting nexin 1                                                                                | 1 | <i>Hel1_210a</i>       |
| <a href="#">NP_001044919.1</a> | Os01g0868200 [Oryza sativa (japonica cultivar-group)]. | Zn-finger, DHHC type domain containing protein                                                 | 1 | <i>Hel1_237a(5'_1)</i> |
| <a href="#">NP_001045118.1</a> | Os01g0902700 [Oryza sativa (japonica cultivar-group)]. | TGF-beta receptor, type I/II extracellular region family protein                               | 1 | <i>Hel1_280a</i>       |
| <a href="#">NP_001045299.1</a> | Os01g0932600 [Oryza sativa (japonica cultivar-group)]. | BTB/POZ domain containing protein                                                              | 1 | <i>Hel1_265a</i>       |
| <a href="#">NP_001045645.1</a> | Os02g0109800 [Oryza sativa (japonica cultivar-group)]. | TPR-like domain containing protein                                                             | 1 | <i>Hel1_268a</i>       |
| <a href="#">NP_001045848.1</a> | Os02g0139700 [Oryza sativa (japonica cultivar-group)]. | Cycloartenol synthase (EC 5.4.99.8)                                                            | 2 | <i>Hel1_111a,b</i>     |
| <a href="#">NP_001046054.1</a> | Os02g0175400 [Oryza sativa (japonica cultivar-group)]. | Vacuolar proton-ATPase                                                                         | 1 | <i>Hel1_267a</i>       |
| <a href="#">NP_001046138.1</a> | Os02g0189000 [Oryza sativa (japonica cultivar-group)]. | Chloroplast 30S ribosomal protein S21 (Fragment)                                               | 2 | <i>Hel1_272a,b</i>     |

|                                |                                                        |                                                                                                        |   |                                        |
|--------------------------------|--------------------------------------------------------|--------------------------------------------------------------------------------------------------------|---|----------------------------------------|
| <a href="#">NP_001046241.1</a> | Os02g0204000 [Oryza sativa (japonica cultivar-group)]. | TPR-like domain containing protein                                                                     | 1 | <i>Hel1_249a</i>                       |
| <a href="#">NP_001046379.1</a> | Os02g0234300 [Oryza sativa (japonica cultivar-group)]. | The start codon is not identified.U box domain containing protein                                      | 1 | <i>Hel1_212a</i>                       |
| <a href="#">NP_001046389.1</a> | Os02g0236100 [Oryza sativa (japonica cultivar-group)]. | SERK1 (Fragment)                                                                                       | 1 | <i>Hel1_108a</i>                       |
| <a href="#">NP_001046573.1</a> | Os02g0285800 [Oryza sativa (japonica cultivar-group)]. | GTP-binding protein TypA family protein                                                                | 3 | <i>Hel1_100a,b,c</i>                   |
| <a href="#">NP_001046702.1</a> | Os02g0325600 [Oryza sativa (japonica cultivar-group)]. | Phosphate starvation regulator protein (Regulatory protein of P- starvation acclimation response Psr1) | 1 | <i>Hel1_250a</i>                       |
| <a href="#">NP_001046842.1</a> | Os02g0475300 [Oryza sativa (japonica cultivar-group)]. | Membrane attack complex component/perforin/complement C9 family protein                                | 3 | <i>Hel1_237a; Hel1_250a; Hel1_297a</i> |
| <a href="#">NP_001047132.1</a> | Os02g0556700 [Oryza sativa (japonica cultivar-group)]. | T-complex 11 family protein                                                                            | 1 | <i>Hel1_264a</i>                       |
| <a href="#">NP_001047196.1</a> | Os02g0572600 [Oryza sativa (japonica cultivar-group)]. | Protein kinase PKN/PRK1, effector domain containing protein                                            | 1 | <i>Hel1_232a</i>                       |
| <a href="#">NP_001047285.1</a> | Os02g0590800 [Oryza sativa (japonica cultivar-group)]. | Protein kinase domain containing protein                                                               | 1 | <i>Hel1_308a</i>                       |
| <a href="#">NP_001047288.1</a> | Os02g0591700 [Oryza sativa (japonica cultivar-group)]. | Ribosomal protein L6 (Fragment)                                                                        | 1 | <i>Hel1_260a</i>                       |
| <a href="#">NP_001047550.1</a> | Os02g0641000 [Oryza sativa (japonica cultivar-group)]. | Transcription factor L2                                                                                | 1 | <i>Hel1_262a</i>                       |
| <a href="#">NP_001047721.1</a> | Os02g0675700 [Oryza sativa (japonica cultivar-group)]. | Putative methyltransferase DUF248 family protein                                                       | 1 | <i>Hel1_258a</i>                       |
| <a href="#">NP_001047756.1</a> | Os02g0683900 [Oryza sativa (japonica cultivar-group)]. | THH1                                                                                                   | 1 | <i>Hel1_126a</i>                       |
| <a href="#">NP_001048014.1</a> | Os02g0730500 [Oryza sativa (japonica cultivar-group)]. | Conserved hypothetical protein                                                                         | 1 | <i>Hel1_223a</i>                       |
| <a href="#">NP_001048067.1</a> | Os02g0739400 [Oryza sativa (japonica cultivar-group)]. | Avr9/Cf-9 rapidly elicited protein 231 precursor                                                       | 3 | <i>Hel1_102a,b,c</i>                   |

|                                |                                                        |                                                                              |   |                        |
|--------------------------------|--------------------------------------------------------|------------------------------------------------------------------------------|---|------------------------|
| <a href="#">NP_001048086.1</a> | Os02g0742000 [Oryza sativa (japonica cultivar-group)]. | Bromo adjacent region domain containing protein                              | 1 | <i>Hel1_286a</i>       |
| <a href="#">NP_001048242.1</a> | Os02g0769200 [Oryza sativa (japonica cultivar-group)]. | Peptidoglycan-binding LysM domain containing protein                         | 1 | <i>Hel1_239a(5'_1)</i> |
| <a href="#">NP_001048267.1</a> | Os02g0773300 [Oryza sativa (japonica cultivar-group)]. | Pyridoxal phosphate-dependent deaminase family protein                       | 1 | <i>Hel1_284a</i>       |
| <a href="#">NP_001048291.1</a> | Os02g0777700 [Oryza sativa (japonica cultivar-group)]. | Myosin ab initio prediction with EST support                                 | 3 | <i>Hel1_116a,b,c</i>   |
| <a href="#">NP_001048326.1</a> | Os02g0784100 [Oryza sativa (japonica cultivar-group)]. | Integrase, catalytic region domain containing protein                        | 1 | <i>Hel1_200a</i>       |
| <a href="#">NP_001048351.1</a> | Os02g0789100 [Oryza sativa (japonica cultivar-group)]. | Cyclic nucleotide-binding domain containing protein                          | 1 | <i>Hel1_220a</i>       |
| <a href="#">NP_001048355.1</a> | Os02g0790500 [Oryza sativa (japonica cultivar-group)]. | Glycosyl transferase, family 20 domain containing protein                    | 1 | <i>Hel1_217a</i>       |
| <a href="#">NP_001048559.1</a> | Os02g0822400 [Oryza sativa (japonica cultivar-group)]. | No apical meristem (NAM) protein domain containing protein                   | 2 | <i>Hel1_108a,b</i>     |
| <a href="#">NP_001048568.1</a> | Os02g0823300 [Oryza sativa (japonica cultivar-group)]. | Zn-finger, RING domain containing protein                                    | 1 | <i>Hel1_229a</i>       |
| <a href="#">NP_001048587.1</a> | Os02g0826500 [Oryza sativa (japonica cultivar-group)]. | ATPase components of ABC transporters with duplicated ATPase domains         | 1 | <i>Hel1_100f</i>       |
| <a href="#">NP_001048697.1</a> | Os03g0107900 [Oryza sativa (japonica cultivar-group)]. | Exostosin-like family protein                                                | 4 | <i>Hel1_110a,b,c,d</i> |
| <a href="#">NP_001048975.1</a> | Os03g0150200 [Oryza sativa (japonica cultivar-group)]. | Ethylene-responsive element binding protein                                  | 1 | <i>Hel1_287a</i>       |
| <a href="#">NP_001049022.1</a> | Os03g0158500 [Oryza sativa (japonica cultivar-group)]. | YT521-B-like protein family protein                                          |   | <i>Hel1_257a(5'_1)</i> |
| <a href="#">NP_001049028.1</a> | Os03g0159200 [Oryza sativa (japonica cultivar-group)]. | Protein of unknown function XS domain containing protein                     | 1 | <i>Hel1_222a</i>       |
| <a href="#">NP_001049428.1</a> | Os03g0224300 [Oryza sativa (japonica cultivar-group)]. | Glycosyl transferase, family 20 domain containing protein                    | 1 | <i>Hel1_265a</i>       |
| <a href="#">NP_001049500.1</a> | Os03g0238600 [Oryza sativa (japonica cultivar-group)]. | Purple acid phosphatase                                                      |   | <i>Hel1_257a(5'_1)</i> |
| <a href="#">NP_001049589.1</a> | Os03g0254900 [Oryza sativa (japonica cultivar-group)]. | The start codon is not identified. Zn-finger, RING domain containing protein | 1 | <i>Hel1_221a</i>       |

|                                |                                                        |                                                                                          |   |                             |
|--------------------------------|--------------------------------------------------------|------------------------------------------------------------------------------------------|---|-----------------------------|
| <a href="#">NP_001049598.1</a> | Os03g0256400 [Oryza sativa (japonica cultivar-group)]. | Imidazole glycerol phosphate synthase, glutamine amidotransferase subunit family protein | 2 | <i>Hel1_209a; Hel1_251a</i> |
| <a href="#">NP_001049651.1</a> | Os03g0265700 [Oryza sativa (japonica cultivar-group)]. | SH3 domain containing protein                                                            | 1 | <i>Hel1_264a</i>            |
| <a href="#">NP_001049684.1</a> | Os03g0270200 [Oryza sativa (japonica cultivar-group)]. | SRm160/300 splicing coactivator (Fragment)                                               | 1 | <i>Hel1_219a</i>            |
| <a href="#">NP_001049717.1</a> | Os03g0277000 [Oryza sativa (japonica cultivar-group)]. | GDP dissociation inhibitor protein OsGDI1                                                | 2 | <i>Hel1_111a,b</i>          |
| <a href="#">NP_001049744.1</a> | Os03g0281600 [Oryza sativa (japonica cultivar-group)]. | Ca <sup>2+</sup> -ATPase; The stop codon is not identified.                              | 1 | <i>Hel1_271a</i>            |
| <a href="#">NP_001049757.1</a> | Os03g0283800 [Oryza sativa (japonica cultivar-group)]. | RabGAP/TBC domain containing protein                                                     | 1 | <i>Hel1_299a(3'_1)</i>      |
| <a href="#">NP_001049762.1</a> | Os03g0284500 [Oryza sativa (japonica cultivar-group)]. | HAD-superfamily subfamily IIA hydrolase, CECR5 protein                                   | 2 | <i>Hel1_219a; Hel1_264a</i> |
| <a href="#">NP_001049853.1</a> | Os03g0300000 [Oryza sativa (japonica cultivar-group)]. | Xyloglucan 6-xylosyltransferase (EC 2.4.2.39) (AtXT1)                                    | 1 | <i>Hel1_275a</i>            |
| <a href="#">NP_001049854.1</a> | Os03g0300100 [Oryza sativa (japonica cultivar-group)]. | Conserved hypothetical protein                                                           | 1 | <i>Hel1_275a</i>            |
| <a href="#">NP_001049874.1</a> | Os03g0303100 [Oryza sativa (japonica cultivar-group)]. | Hypothetical protein supported by AK071041"                                              | 1 | <i>Hel1_248a(3'_1)</i>      |
| <a href="#">NP_001050052.1</a> | Os03g0337900 [Oryza sativa (japonica cultivar-group)]. | Fumarate hydratase 2, chloroplast precursor (EC 4.2.1.2) (Fumarase 2). Splice isoform 3  | 1 | <i>Hel1_208a</i>            |
| <a href="#">NP_001050112.1</a> | Os03g0350100 [Oryza sativa (japonica cultivar-group)]. | SAR DNA-binding protein-2 The stop codon is not identified.                              | 3 | <i>Hel1_102a,b,c</i>        |
| <a href="#">NP_001050132.1</a> | Os03g0355200 [Oryza sativa (japonica cultivar-group)]. | Splicing factor motif domain containing protein                                          | 1 | <i>Hel1_263a</i>            |
| <a href="#">NP_001050241.1</a> | Os03g0381300 [Oryza sativa (japonica cultivar-group)]. | HSP20-like chaperone domain containing protein                                           | 1 | <i>Hel1_282a</i>            |
| <a href="#">NP_001050422.1</a> | Os03g0430000 [Oryza sativa (japonica cultivar-group)]. | Conserved hypothetical protein                                                           | 1 | <i>Hel1_299a(3'_2)</i>      |
| <a href="#">NP_001050612.1</a> | Os03g0598800 [Oryza sativa (japonica cultivar-group)]. | 60S ribosomal protein L15                                                                | 1 | <i>Hel1_211a</i>            |

|                                |                                                        |                                                                                                                                 |   |                             |
|--------------------------------|--------------------------------------------------------|---------------------------------------------------------------------------------------------------------------------------------|---|-----------------------------|
| <a href="#">NP_001050655.1</a> | Os03g0611200 [Oryza sativa (japonica cultivar-group)]. | Aldo/keto reductase family protein                                                                                              | 1 | <i>Hel1_211a</i>            |
| <a href="#">NP_001050779.1</a> | Os03g0648400 [Oryza sativa (japonica cultivar-group)]. | DnaJ protein homolog ANJ1                                                                                                       | 3 | <i>Hel1_115a,b,c</i>        |
| <a href="#">NP_001050878.1</a> | Os03g0673100 [Oryza sativa (japonica cultivar-group)]. | Homeotic protein knotted-1 (TKN1)                                                                                               | 2 | <i>Hel1_286a; Hel1_300a</i> |
| <a href="#">NP_001050955.1</a> | Os03g0691500 [Oryza sativa (japonica cultivar-group)]. | Conserved hypothetical protein 173..>487 /region_name="Smc" /note="Chromosome segregation ATPases                               | 1 | <i>Hel1_253a</i>            |
| <a href="#">NP_001051130.1</a> | Os03g0725400 [Oryza sativa (japonica cultivar-group)]. | WD-repeat protein 5 (WD-repeat protein BIG-3)                                                                                   | 1 | <i>Hel1_281a</i>            |
| <a href="#">NP_001051190.1</a> | Os03g0736000 [Oryza sativa (japonica cultivar-group)]. | NOT2/NOT3/NOT5 family protein The start codon is not identified.                                                                | 1 | <i>Hel1_269a</i>            |
| <a href="#">NP_001051202.1</a> | Os03g0737400 [Oryza sativa (japonica cultivar-group)]. | Magnesium-dependent phosphatase-1 family protein                                                                                | 1 | <i>Hel_252a</i>             |
| <a href="#">NP_001051237.1</a> | Os03g0744300 [Oryza sativa (japonica cultivar-group)]. | Protein kinase domain containing protein The start codon is not identified.                                                     | 1 | <i>Hel1_244a</i>            |
| <a href="#">NP_001051250.1</a> | Os03g0746500 [Oryza sativa (japonica cultivar-group)]. | RNA helicase like protein                                                                                                       | 2 | <i>Hel1_120a,b</i>          |
| <a href="#">NP_001051279.1</a> | Os03g0749900 [Oryza sativa (japonica cultivar-group)]. | Conserved hypothetical protein                                                                                                  | 1 | <i>Hel1_203a</i>            |
| <a href="#">NP_001051331.1</a> | Os03g0758300 [Oryza sativa (japonica cultivar-group)]. | Cyclic nucleotide-gated ion channel 2 (AtCNGC2) (Cyclic nucleotide-and calmodulin-regulated ion channel 2) (DEFENSE NO DEATH 1) | 2 | <i>Hel1_200a; Hel1_269a</i> |
| <a href="#">NP_001051455.1</a> | Os03g0781000 [Oryza sativa (japonica cultivar-group)]. | Conserved hypothetical protein 92 family protein The start codon is not identified.                                             | 1 | <i>Hel1_273a</i>            |
| <a href="#">NP_001051497.1</a> | Os03g0787300 [Oryza sativa (japonica cultivar-group)]. | DnaJ protein homolog (DNAJ-1);                                                                                                  | 2 | <i>Hel1_115d,e</i>          |
| <a href="#">NP_001051520.1</a> | Os03g0791500 [Oryza sativa (japonica cultivar-group)]. | Synaptobrevin family protein                                                                                                    | 1 | <i>Hel1_231a</i>            |

|                                |                                                        |                                                                                       |   |                                 |
|--------------------------------|--------------------------------------------------------|---------------------------------------------------------------------------------------|---|---------------------------------|
| <a href="#">NP_001051558.1</a> | Os03g0796900 [Oryza sativa (japonica cultivar-group)]. | BZIP protein                                                                          | 1 | <i>Hel1_297a(5'_1)</i>          |
| <a href="#">NP_001051655.1</a> | Os03g0809100 [Oryza sativa (japonica cultivar-group)]. | Major facilitator superfamily protein                                                 | 1 | <i>Hel1_201a</i>                |
| <a href="#">NP_001051697.1</a> | Os03g0816900 [Oryza sativa (japonica cultivar-group)]. | Conserved hypothetical protein                                                        | 1 | <i>Hel1_300a</i>                |
| <a href="#">NP_001051723.1</a> | Os03g0820900 [Oryza sativa (japonica cultivar-group)]. | Cellular retinaldehyde-binding)/triple function, C-terminal domain containing protein | 1 | <i>Hel1_210a</i>                |
| <a href="#">NP_001051736.1</a> | Os03g0822700 [Oryza sativa (japonica cultivar-group)]. | ARM repeat fold domain containing protein                                             | 1 | <i>Hel1_124a</i>                |
| <a href="#">NP_001051790.1</a> | Os03g0830900 [Oryza sativa (japonica cultivar-group)]. | Lipase, class 3 family protein                                                        | 1 | <i>Hel1_295a</i>                |
| <a href="#">NP_001051902.1</a> | Os03g0850000 [Oryza sativa (japonica cultivar-group)]. | Short-chain dehydrogenase/reductase SDR family protein                                | 1 | <i>Hel1_127a</i>                |
| <a href="#">NP_001052155.1</a> | Os04g0174800 [Oryza sativa (japonica cultivar-group)]. | Protein prenyltransferase domain containing protein                                   | 1 | <i>Hel1_108b</i>                |
| <a href="#">NP_001052435.1</a> | Os04g0310500 [Oryza sativa (japonica cultivar-group)]. | Mitochondrial ribosome domain containing protein                                      | 3 | <i>Hel1_116a,b,c</i>            |
| <a href="#">NP_001052458.1</a> | Os04g0320200 [Oryza sativa (japonica cultivar-group)]. | TPR-like domain containing protein                                                    | 1 | <i>Hel1_301a</i>                |
| <a href="#">NP_001052787.1</a> | Os04g0421900 [Oryza sativa (japonica cultivar-group)]. | Conserved hypothetical protein                                                        | 3 | <i>Hel1_102a,b,c</i>            |
| <a href="#">NP_001052829.1</a> | Os04g0432200 [Oryza sativa (japonica cultivar-group)]. | DEAD/DEAH box helicase, N-terminal domain containing protein                          | 1 | <i>Hel1_275a</i>                |
| <a href="#">NP_001052982.1</a> | Os04g0459000 [Oryza sativa (japonica cultivar-group)]. | MDR-like ABC transporter                                                              | 4 | <i>Hel1_102a,b,c; Hel1_109a</i> |
| <a href="#">NP_001053236.1</a> | Os04g0502800 [Oryza sativa (japonica cultivar-group)]. | Nodulin-like protein                                                                  | 1 | <i>Hel1_285a(3'_2)</i>          |
| <a href="#">NP_001053259.1</a> | Os04g0506800 [Oryza sativa (japonica cultivar-group)]. | Glycosyl transferase, family 29 protein                                               | 2 | <i>Hel1_115d,e</i>              |

|                                |                                                        |                                                                                                     |   |                                          |
|--------------------------------|--------------------------------------------------------|-----------------------------------------------------------------------------------------------------|---|------------------------------------------|
| <a href="#">NP_001054020.1</a> | Os04g0636700 [Oryza sativa (japonica cultivar-group)]. | Protein of unknown function DUF618 domain containing protein                                        | 1 | <i>Hel1_203a</i>                         |
| <a href="#">NP_001054048.1</a> | Os04g0643100 [Oryza sativa (japonica cultivar-group)]. | Vacuolar ATP synthase subunit D (EC 3.6.3.14) (V-ATPase D subunit) (Vacuolar proton pump D subunit) | 1 | <i>Hel1_268a</i>                         |
| <a href="#">NP_001054071.1</a> | Os04g0647800 [Oryza sativa (japonica cultivar-group)]. | Glycerol kinase 2                                                                                   | 1 | <i>Hel1_204a</i>                         |
| <a href="#">NP_001054142.1</a> | Os04g0660200 [Oryza sativa (japonica cultivar-group)]. | ABC-1 family protein                                                                                | 1 | <i>Hel1_231a</i>                         |
| <a href="#">NP_001054236.1</a> | Os04g0674100 [Oryza sativa (japonica cultivar-group)]. | TPR-like domain containing protein                                                                  | 1 | <i>Hel1_286a</i>                         |
| <a href="#">NP_001054308.1</a> | Os04g0684200 [Oryza sativa (japonica cultivar-group)]. | Protein kinase domain containing protein;                                                           | 4 | <i>Hel1_120a,b; Hel1_234a; Hel1_260a</i> |
| <a href="#">NP_001054329.1</a> | Os04g0686700 [Oryza sativa (japonica cultivar-group)]. | Cyclin-like F-box domain containing protein                                                         | 1 | <i>Hel1_290a</i>                         |
| <a href="#">NP_001054415.1</a> | Os05g0106000 [Oryza sativa (japonica cultivar-group)]. | Zn-finger, C2H2 type domain containing protein                                                      | 1 | <i>Hel1_201a</i>                         |
| <a href="#">NP_001054539.1</a> | Os05g0128400 [Oryza sativa (japonica cultivar-group)]. | Metal tolerance protein 1                                                                           | 2 | <i>Hel1_206a; Hel1_287a</i>              |
| <a href="#">NP_001054667.1</a> | Os05g0150600 [Oryza sativa (japonica cultivar-group)]. | ATP-dependent DNA helicase RecQ family protein                                                      | 3 | <i>Hel1_109a,b; Hel1_250a</i>            |
| <a href="#">NP_001054755.1</a> | Os05g0168500 [Oryza sativa (japonica cultivar-group)]. | Nonaspanin (TM9SF) family protein                                                                   | 2 | <i>Hel1_112a,b</i>                       |
| <a href="#">NP_001054812.1</a> | Os05g0181000 [Oryza sativa (japonica cultivar-group)]. | Heat shock protein Hsp70 family protein                                                             | 3 | <i>Hel1_116a,b,c</i>                     |
| <a href="#">NP_001054858.1</a> | Os05g0194600 [Oryza sativa (japonica cultivar-group)]. | Peptidase M22, O-sialoglycoprotein family protein                                                   | 1 | <i>Hel1_284a</i>                         |
| <a href="#">NP_001055036.1</a> | Os05g0256000 [Oryza sativa (japonica cultivar-group)]. | TGF-beta receptor-interacting protein 1                                                             | 1 | <i>Hel1_244a(5'_1)</i>                   |
| <a href="#">NP_001055071.1</a> | Os05g0274300 [Oryza sativa (japonica cultivar-group)]. | Conserved hypothetical protein                                                                      | 1 | <i>Hel1_216a</i>                         |
| <a href="#">NP_001055073.1</a> | Os05g0275000 [Oryza sativa (japonica cultivar-group)]. | Protein prenyltransferase domain containing protein                                                 | 1 | <i>Hel1_297a(5'_2)</i>                   |

|                                |                                                        |                                                                                   |    |                                                                            |
|--------------------------------|--------------------------------------------------------|-----------------------------------------------------------------------------------|----|----------------------------------------------------------------------------|
| <a href="#">NP_001055073.1</a> | Os05g0275000 [Oryza sativa (japonica cultivar-group)]. | Protein prenyltransferase domain containing protein                               | 1  | <i>Hel1_297a(5'_1)</i>                                                     |
| <a href="#">NP_001055172.1</a> | Os05g0316000 [Oryza sativa (japonica cultivar-group)]. | Zn-finger, RING domain containing protein                                         | 1  | <i>Hel1_301a</i>                                                           |
| <a href="#">NP_001055303.1</a> | Os05g0358500 [Oryza sativa (japonica cultivar-group)]. | Protein phosphatase-like                                                          | 84 | <i>Hel1_122a; Hel1_226a; Hel1_262a; Hel1_279a; Hel1_298a; Hel1_105a-b4</i> |
| <a href="#">NP_001055652.1</a> | Os05g0437300 [Oryza sativa (japonica cultivar-group)]. | HnRNP-L/PTB/hephaestus splicing factor family protein                             | 1  | <i>Hel1_237a</i>                                                           |
| <a href="#">NP_001055719.1</a> | Os05g0454400 [Oryza sativa (japonica cultivar-group)]. | Conserved hypothetical protein                                                    | 1  | <i>Hel1_305a</i>                                                           |
| <a href="#">NP_001055812.1</a> | Os05g0471000 [Oryza sativa (japonica cultivar-group)]. | Protein kinase domain containing protein                                          | 1  | <i>Hel1_203a</i>                                                           |
| <a href="#">NP_001055944.1</a> | Os05g0497600 [Oryza sativa (japonica cultivar-group)]. | Ribosomal L11 methyltransferase family protein                                    | 1  | <i>Hel1_265a</i>                                                           |
| <a href="#">NP_001056107.1</a> | Os05g0527000 [Oryza sativa (japonica cultivar-group)]. | UDP-glucuronosyl/UDP-glucosyltransferase family protein                           | 1  | <i>Hel1_238a</i>                                                           |
| <a href="#">NP_001056206.1</a> | Os05g0543700 [Oryza sativa (japonica cultivar-group)]. | Chaperone protein dnaJ (40 kDa heat shock chaperone protein) (HSP40)              | 1  | <i>Hel1_264a</i>                                                           |
| <a href="#">NP_001056303.1</a> | Os05g0559900 [Oryza sativa (japonica cultivar-group)]. | region_name="Herpes_LMP1"<br>/note="Herpesvirus latent membrane protein 1 (LMP1); | 1  | <i>Hel1_247a</i>                                                           |
| <a href="#">NP_001056342.1</a> | Os05g0566400 [Oryza sativa (japonica cultivar-group)]. | Blast and wounding induced mitogen-activated protein kinase                       | 1  | <i>Hel1_292a</i>                                                           |
| <a href="#">NP_001056433.1</a> | Os05g0581800 [Oryza sativa (japonica cultivar-group)]. | Protein of unknown function DUF1296 family protein                                | 1  | <i>Hel1_219a</i>                                                           |
| <a href="#">NP_001056580.1</a> | Os06g0110100 [Oryza sativa (japonica cultivar-group)]. | OSEYA1                                                                            | 2  | <i>Hel1_225a; Hel_252a</i>                                                 |
| <a href="#">NP_001056622.1</a> | Os06g0116600 [Oryza sativa (japonica cultivar-group)]. | Proteinase inhibitor, propeptide domain containing protein                        | 1  | <i>Hel1_236a</i>                                                           |
| <a href="#">NP_001056864.1</a> | Os06g0158200 [Oryza sativa (japonica cultivar-group)]. | /region_name="HS6ST"<br>/note="Heparan sulfate 6-sulfotransferase (HS6ST)         | 1  | <i>Hel1_301a</i>                                                           |



|                                |                                                        |                                                                                           |   |                                     |
|--------------------------------|--------------------------------------------------------|-------------------------------------------------------------------------------------------|---|-------------------------------------|
| <a href="#">NP_001057027.1</a> | Os06g0191200 [Oryza sativa (japonica cultivar-group)]. | Zn-finger, Ran-binding domain containing protein                                          | 1 | <i>Hel1_124a</i>                    |
| <a href="#">NP_001057137.1</a> | Os06g0215300 [Oryza sativa (japonica cultivar-group)]. | ToIB, C-terminal domain containing protein                                                | 1 | <i>Hel1_296a</i>                    |
| <a href="#">NP_001057284.1</a> | Os06g0247500 [Oryza sativa (japonica cultivar-group)]. | Pyrophosphate--fructose 6-phosphate 1-phosphotransferase beta subunit (EC 2.7.1.90) (PFP) | 1 | <i>Hel1_281a</i>                    |
| <a href="#">NP_001057406.1</a> | Os06g0285900 [Oryza sativa (japonica cultivar-group)]. | ARM repeat fold domain containing protein                                                 | 1 | <i>Hel_252a</i>                     |
| <a href="#">NP_001057591.1</a> | Os06g0354500 [Oryza sativa (japonica cultivar-group)]. | Acyl-CoA oxidase ACX3                                                                     | 1 | <i>Hel1_308a</i>                    |
| <a href="#">NP_001057699.1</a> | Os06g0498400 [Oryza sativa (japonica cultivar-group)]. | region_name="PPDK_N"<br>/note="Pyruvate phosphate dikinase, PEP/pyruvate binding domain.  | 1 | <i>Hel1_210a</i>                    |
| <a href="#">NP_001057926.1</a> | Os06g0574500 [Oryza sativa (japonica cultivar-group)]. | Protein phosphatase 2A                                                                    | 1 | <i>Hel1_240a(3'_1)</i>              |
| <a href="#">NP_001057960.1</a> | Os06g0589300 [Oryza sativa (japonica cultivar-group)]. | Viral coat and capsid protein family protein                                              | 1 | <i>Hel1_258a</i>                    |
| <a href="#">NP_001057997.1</a> | Os06g0598900 [Oryza sativa (japonica cultivar-group)]. | WD40-like domain containing protein                                                       | 1 | <i>Hel1_264a</i>                    |
| <a href="#">NP_001058116.1</a> | Os06g0625900 [Oryza sativa (japonica cultivar-group)]. | Potassium transporter 8 (AtPOT8) (AtHAK8)                                                 | 1 | <i>Hel1_285a(3'_1)</i>              |
| <a href="#">NP_001058191.1</a> | Os06g0645400 [Oryza sativa (japonica cultivar-group)]. | Isoleucyl-tRNA synthetase                                                                 | 1 | <i>Hel1_257a</i>                    |
| <a href="#">NP_001058442.1</a> | Os06g0694400 [Oryza sativa (japonica cultivar-group)]. | Hypothetical protein                                                                      | 1 | <i>Hel1_309a</i>                    |
| <a href="#">NP_001058451.1</a> | Os06g0695600 [Oryza sativa (japonica cultivar-group)]. | Zn-finger, RING domain containing protein                                                 | 1 | <i>Hel1_284a</i>                    |
| <a href="#">NP_001058591.1</a> | Os06g0716800 [Oryza sativa (japonica cultivar-group)]. | Eukaryotic transcription factor, DNA-binding domain containing protein                    | 1 | <i>Hel1_234a</i>                    |
| <a href="#">NP_001058926.1</a> | Os07g0158200 [Oryza sativa (japonica cultivar-group)]. | TatD-related deoxyribonuclease family protein                                             | 7 | <i>Hel1_100a,b,c; Hel1_116a,b,c</i> |
| <a href="#">NP_001058935.1</a> | Os07g0159900 [Oryza sativa (japonica cultivar-group)]. | Glutaredoxin domain containing protein;                                                   | 1 | <i>Hel1_229a</i>                    |

|                                |                                                        |                                                                                     |   |                                   |
|--------------------------------|--------------------------------------------------------|-------------------------------------------------------------------------------------|---|-----------------------------------|
| <a href="#">NP_001059438.1</a> | Os07g0408700 [Oryza sativa (japonica cultivar-group)]. | Spermidine synthase 2 (EC 2.5.1.16) (Putrescine aminopropyltransferase 2) (SPDSY 2) | 1 | <i>Hel1_245a(3'_2)</i>            |
| <a href="#">NP_001059624.1</a> | Os07g0475900 [Oryza sativa (japonica cultivar-group)]. | Amino acid-binding ACT domain containing protein                                    | 2 | <i>Hel1_240a(3'_1); Hel1_278a</i> |
| <a href="#">NP_001059728.1</a> | Os07g0503500 [Oryza sativa (japonica cultivar-group)]. | UDP-glucuronosyl/UDP-glucosyltransferase family protein                             | 4 | <i>Hel1_110a,b,c,d</i>            |
| <a href="#">NP_001059759.1</a> | Os07g0511000 [Oryza sativa (japonica cultivar-group)]. | Conserved hypothetical protein                                                      | 1 | <i>Hel1_289a</i>                  |
| <a href="#">NP_001059785.1</a> | Os07g0516600 [Oryza sativa (japonica cultivar-group)]. | Multi antimicrobial extrusion protein MatE family protein                           | 1 | <i>Hel1_282a</i>                  |
| <a href="#">NP_001059920.1</a> | Os07g0546100 [Oryza sativa (japonica cultivar-group)]. | Conserved hypothetical protein supported by AK100024"                               | 2 | <i>Hel1_120a,b</i>                |
| <a href="#">NP_001060009.1</a> | Os07g0565200 [Oryza sativa (japonica cultivar-group)]. | Cell differentiation protein rcd1; The start codon is not identified.               | 1 | <i>Hel1_264a</i>                  |
| <a href="#">NP_001060014.1</a> | Os07g0565700 [Oryza sativa (japonica cultivar-group)]. | Alpha/beta hydrolase family protein                                                 | 1 | <i>Hel1_300a</i>                  |
| <a href="#">NP_001060055.1</a> | Os07g0572000 [Oryza sativa (japonica cultivar-group)]. | WD40-like domain containing protein                                                 |   | <i>Hel1_257a(5'_1)</i>            |
| <a href="#">NP_001060150.1</a> | Os07g0589400 [Oryza sativa (japonica cultivar-group)]. | Quinonprotein alcohol dehydrogenase-like domain containing protein                  | 1 | <i>Hel1_234a</i>                  |
| <a href="#">NP_001060172.1</a> | Os07g0596600 [Oryza sativa (japonica cultivar-group)]. | Protein kinase domain containing protein                                            | 1 | <i>Hel1_229a</i>                  |
| <a href="#">NP_001060300.1</a> | Os07g0620400 [Oryza sativa (japonica cultivar-group)]. | GTP-binding protein ATGB1 (GTP-binding protein-like) (At5g52210)                    | 2 | <i>Hel1_118a,b</i>                |
| <a href="#">NP_001060436.1</a> | Os07g0642400 [Oryza sativa (japonica cultivar-group)]. | SNF2-related domain containing protein                                              | 1 | <i>Hel1_126a</i>                  |
| <a href="#">NP_001060449.1</a> | Os07g0644600 [Oryza sativa (japonica cultivar-group)]. | Cytochrome P450 family protein                                                      | 1 | <i>Hel1_286a</i>                  |
| <a href="#">NP_001060510.1</a> | Os07g0657200 [Oryza sativa (japonica cultivar-group)]. | WD40-like domain containing protein                                                 | 1 | <i>Hel1_251a</i>                  |

|                                |                                                        |                                                                                           |   |                             |
|--------------------------------|--------------------------------------------------------|-------------------------------------------------------------------------------------------|---|-----------------------------|
| <a href="#">NP_001060538.1</a> | Os07g0661500 [Oryza sativa (japonica cultivar-group)]. | DDT domain containing protein                                                             | 1 | <i>Hel1_258a</i>            |
| <a href="#">NP_001060547.1</a> | Os07g0662900 [Oryza sativa (japonica cultivar-group)]. | 4-alpha-glucanotransferase (EC 2.4.1.25)                                                  | 4 | <i>Hel1_101a,b,c,d</i>      |
| <a href="#">NP_001060637.1</a> | Os07g0679000 [Oryza sativa (japonica cultivar-group)]. | Potassium transporter 2 (AtPOT2) (AtKUP2) (AtKT2)                                         | 1 | <i>Hel1_265a</i>            |
| <a href="#">NP_001060729.1</a> | Os07g0693400 [Oryza sativa (japonica cultivar-group)]. | ARM repeat fold domain containing protein                                                 | 1 | <i>Hel1_240a(3'_1)</i>      |
| <a href="#">NP_001060912.1</a> | Os08g0128500 [Oryza sativa (japonica cultivar-group)]. | 60S ribosomal protein L37-A (L35) (YP55)                                                  | 2 | <i>Hel1_109a,b</i>          |
| <a href="#">NP_001061297.1</a> | Os08g0230200 [Oryza sativa (japonica cultivar-group)]. | Conserved hypothetical protein supported by AK069639"                                     | 4 | <i>Hel1_110a,b,c,d</i>      |
| <a href="#">NP_001061540.1</a> | Os08g0323000 [Oryza sativa (japonica cultivar-group)]. | Conserved hypothetical protein supported by AK064573"                                     | 1 | <i>Hel1_251a</i>            |
| <a href="#">NP_001061581.1</a> | Os08g0337700 [Oryza sativa (japonica cultivar-group)]. | RabGAP/TBC domain containing protein                                                      | 1 | <i>Hel1_270a</i>            |
| <a href="#">NP_001061823.1</a> | Os08g0421800 [Oryza sativa (japonica cultivar-group)]. | Mitogen-activated protein kinase kinase 1                                                 | 2 | <i>Hel1_114d; Hel1_124a</i> |
| <a href="#">NP_001061972.1</a> | Os08g0459100 [Oryza sativa (japonica cultivar-group)]. | Leucine-rich repeat, cysteine-containing containing protein                               | 2 | <i>Hel1_120a,b</i>          |
| <a href="#">NP_001062139.1</a> | Os08g0497300 [Oryza sativa (japonica cultivar-group)]. | Cellular retinaldehyde binding/alpha-tocopherol transport family protein                  | 1 | <i>Hel1_126a</i>            |
| <a href="#">NP_001062209.1</a> | Os08g0510800 [Oryza sativa (japonica cultivar-group)]. | Conserved hypothetical protein                                                            | 1 | <i>Hel1_269a</i>            |
| <a href="#">NP_001062394.1</a> | Os08g0542700 [Oryza sativa (japonica cultivar-group)]. | Ankyrin repeat containing protein                                                         | 1 | <i>Hel1_249a</i>            |
| <a href="#">NP_001062427.1</a> | Os08g0547200 [Oryza sativa (japonica cultivar-group)]. | RabGAP/TBC domain containing protein                                                      | 1 | <i>Hel1_297a(5'_1)</i>      |
| <a href="#">NP_001062802.1</a> | Os09g0296900 [Oryza sativa (japonica cultivar-group)]. | Peptidase S9A, prolyl oligopeptidase, N-terminal beta-propeller domain containing protein | 1 | <i>Hel1_232a</i>            |
| <a href="#">NP_001105393.1</a> | Os09g0297400 [Oryza sativa (japonica cultivar-group)]. | Phosphate/phosphoenolpyruvate translocator                                                | 1 | <i>Hel1_294a</i>            |

|                                |                                                        |                                                                                                |   |                                          |
|--------------------------------|--------------------------------------------------------|------------------------------------------------------------------------------------------------|---|------------------------------------------|
| <a href="#">NP_001062976.1</a> | Os09g0359900 [Oryza sativa (japonica cultivar-group)]. | Conserved hypothetical protein supported by AK105521                                           | 1 | <i>Hel1_276a(3'_1)</i>                   |
| <a href="#">NP_001063250.1</a> | Os09g0434100 [Oryza sativa (japonica cultivar-group)]. | Conserved hypothetical protein supported by AK070207"                                          | 1 | <i>Hel1_248a(3'_1)</i>                   |
| <a href="#">NP_001063351.1</a> | Os09g0454300 [Oryza sativa (japonica cultivar-group)]. | Cyclin-like F-box domain containing protein                                                    | 1 | <i>Hel1_281a</i>                         |
| <a href="#">NP_001063397.1</a> | Os09g0461900 [Oryza sativa (japonica cultivar-group)]. | Esterase/lipase/thioesterase domain containing protein                                         | 1 | <i>Hel1_201a</i>                         |
| <a href="#">NP_001063456.1</a> | Os09g0474300 [Oryza sativa (japonica cultivar-group)]. | Heat-shock protein precursor                                                                   | 1 | <i>Hel1_288a(3'_1)</i>                   |
| <a href="#">NP_001063541.1</a> | Os09g0492700 [Oryza sativa (japonica cultivar-group)]. | 3-hydroxy-3-methylglutaryl-coenzyme A reductase 1 (EC 1.1.1.34) (HMG- CoA reductase 1) (HMGR1) | 4 | <i>Hel1_100a,b,c,d</i>                   |
| <a href="#">NP_001063862.1</a> | Os09g0550000 [Oryza sativa (japonica cultivar-group)]. | Bromodomain containing protein                                                                 | 1 | <i>Hel1_301a</i>                         |
| <a href="#">NP_001063899.1</a> | Os09g0556500 [Oryza sativa (japonica cultivar-group)]. | CysteinyI-tRNA synthetase, class Ia family protein                                             | 2 | <i>Hel1_220a; Hel1_276a(3'_2)</i>        |
| <a href="#">NP_001064140.1</a> | Os10g0140200 [Oryza sativa (japonica cultivar-group)]. | Glycoside hydrolase, family 38 domain containing protein                                       | 1 | <i>Hel1_114d</i>                         |
| <a href="#">NP_001064280.1</a> | Os10g0192300 [Oryza sativa (japonica cultivar-group)]. | Conserved hypothetical protein                                                                 | 4 | <i>Hel1_109a,b; Hel1_260a; Hel1_284a</i> |
| <a href="#">NP_001064388.1</a> | Os10g0343200 [Oryza sativa (japonica cultivar-group)]. | Protein of unknown function DUF588 family protein                                              | 1 | <i>Hel1_271a</i>                         |
| <a href="#">NP_001064470.1</a> | Os10g0375600 [Oryza sativa (japonica cultivar-group)]. | CG-1 domain containing protein                                                                 | 1 | <i>Hel1_288a(3'_1)</i>                   |
| <a href="#">NP_001064496.1</a> | Os10g0388600 [Oryza sativa (japonica cultivar-group)]. | Peptidase C48, SUMO/Sentrin/Ubl1 family protein                                                | 1 | <i>Hel1_256a</i>                         |
| <a href="#">NP_001064567.1</a> | Os10g0407000 [Oryza sativa (japonica cultivar-group)]. | Pectinesterase family protein                                                                  | 1 | <i>Hel1_205a</i>                         |
| <a href="#">NP_001064986.1</a> | Os10g0501500 [Oryza sativa (japonica cultivar-group)]. | Protein of unknown function DUF607 family protein                                              | 4 | <i>Hel1_100a,b,c</i>                     |
| <a href="#">NP_001065020.1</a> | Os10g0508100 [Oryza sativa (japonica cultivar-group)]. | Plant protein of unknown function DUF641 domain containing protein                             | 1 | <i>Hel1_202a</i>                         |

|                                |                                                        |                                                                                                                 |   |                                 |
|--------------------------------|--------------------------------------------------------|-----------------------------------------------------------------------------------------------------------------|---|---------------------------------|
| <a href="#">NP_001065429.1</a> | Os10g0567000 [Oryza sativa (japonica cultivar-group)]. | Camphor resistance CrcB protein family protein                                                                  | 1 | <i>Hel1_202a</i>                |
| <a href="#">NP_001065837.1</a> | Os11g0167200 [Oryza sativa (japonica cultivar-group)]. | Hypothetical protein                                                                                            | 1 | <i>Hel1_210a</i>                |
| <a href="#">NP_001067741.1</a> | Os11g0303500 [Oryza sativa (japonica cultivar-group)]. | Hypothetical protein supported by AK068734                                                                      | 2 | <i>Hel1_118a,b</i>              |
| <a href="#">NP_001067972.1</a> | Os11g0516000 [Oryza sativa (japonica cultivar-group)]. | Serine palmitoyltransferase                                                                                     | 1 | <i>Hel1_242a</i>                |
| <a href="#">NP_001068067.1</a> | Os11g0546900 [Oryza sativa (japonica cultivar-group)]. | TaWIN1 The start codon is not identified.                                                                       | 3 | <i>Hel1_114a,b,c</i>            |
| <a href="#">NP_001068129.1</a> | Os11g0573000 [Oryza sativa (japonica cultivar-group)]. | Conserved hypothetical protein /note="Ubiquitin carboxyl-terminal hydrolase                                     | 1 | <i>Hel_252a</i>                 |
| <a href="#">NP_001068278.1</a> | Os11g0615700 [Oryza sativa (japonica cultivar-group)]. | Proteasome subunit alpha type 5 (EC 3.4.25.1) (20S proteasome alpha subunit E) (20S proteasome subunit alpha-5) | 1 | <i>Hel1_287a</i>                |
| <a href="#">NP_001068371.1</a> | Os11g0648000 [Oryza sativa (japonica cultivar-group)]. | Sodium/hydrogen exchanger subfamily protein                                                                     | 4 | <i>Hel1_116a,b,c; Hel1_296a</i> |
| <a href="#">NP_001068399.1</a> | Os11g0658800 [Oryza sativa (japonica cultivar-group)]. | Glycoside hydrolase, family 28 protein                                                                          | 1 | <i>Hel1_265a</i>                |
| <a href="#">NP_001068408.1</a> | Os11g0661200 [Oryza sativa (japonica cultivar-group)]. | Heat shock protein DnaJ, N-terminal domain containing protein                                                   | 1 | <i>Hel1_237a(5'_1)</i>          |
| <a href="#">NP_001068441.1</a> | Os11g0673200 [Oryza sativa (japonica cultivar-group)]. | Alpha-L-arabinofuranosidase/beta-D-xylosidase isoenzyme ARA-I                                                   | 1 | <i>Hel1_276a(3'_1)</i>          |
| <a href="#">NP_001068490.1</a> | Os11g0689400 [Oryza sativa (japonica cultivar-group)]. | RNA helicase, DRH1                                                                                              | 1 | <i>Hel1_208a</i>                |
| <a href="#">NP_001068533.1</a> | Os11g0702700 [Oryza sativa (japonica cultivar-group)]. | Homeodomain-like containing protein                                                                             | 1 | <i>Hel1_265a</i>                |
| <a href="#">NP_001066135.1</a> | Os12g0143200 [Oryza sativa (japonica cultivar-group)]. | SPIa/Ryanodine receptor SPRY domain containing protein                                                          | 1 | <i>Hel1_204a</i>                |
| <a href="#">NP_001066238.1</a> | Os12g0165000 [Oryza sativa (japonica cultivar-group)]. | WD40-like domain containing protein                                                                             | 1 | <i>Hel1_209a</i>                |

|                                |                                                                                                                                                                                             |                                                                                                                           |   |                                                                               |
|--------------------------------|---------------------------------------------------------------------------------------------------------------------------------------------------------------------------------------------|---------------------------------------------------------------------------------------------------------------------------|---|-------------------------------------------------------------------------------|
| <a href="#">NP_001066993.1</a> | Os12g0554800 [Oryza sativa (japonica cultivar-group)].                                                                                                                                      | Polygalacturonase-like protein                                                                                            | 1 | <i>Hel1_301a</i>                                                              |
| <a href="#">NP_001067191.1</a> | Os12g0597100 [Oryza sativa (japonica cultivar-group)].                                                                                                                                      | Meprin/TRAF-like domain-containing protein (Fragment)                                                                     | 1 | <i>Hel1_202a</i>                                                              |
| <a href="#">NP_181461.1</a>    | PGP1/PGPS1/PGS1 (PHOSPHATIDYLGLYCEROLPHOSPHATE SYNTHASE 1); CDP-alcohol phosphatidyltransferase/ CDP-diacylglycerol- glycerol-3-phosphate 3-phosphatidyltransferase [Arabidopsis thaliana]. | gene="PGP1/PGPS1/PGS1"                                                                                                    | 1 | <i>Hel1_291a(5'_2)</i>                                                        |
| <a href="#">BAC75570.1</a>     | PHD-type zinc finger protein-like [Oryza sativa Japonica Group].                                                                                                                            | PHD-type zinc finger protein-like                                                                                         | 3 | <i>Hel1_107a,b,c</i>                                                          |
| <a href="#">AAP12994.1</a>     | putative beige protein [Oryza sativa (japonica cultivar-group)].                                                                                                                            | putative beige protein                                                                                                    | 1 | <i>Hel1_236a</i>                                                              |
| <a href="#">AAQ56500.1</a>     | putative DNA-binding protein [Oryza sativa (japonica cultivar-group)].                                                                                                                      | putative DNA-binding protein                                                                                              | 1 | <i>Hel1_285a(3'_1)</i>                                                        |
| <a href="#">AAT08013.1</a>     | putative growth-regulating factor 1 [Zea mays]                                                                                                                                              | similar to Sorghum bicolor putative growth-regulating factor 1 encoded by AF466199"                                       | 5 | <i>Hel1_101a,b,c,d; Hel1_229a</i>                                             |
| <a href="#">AAT08010.1</a>     | putative kinase [Zea mays].                                                                                                                                                                 | similar to Arabidopsis thaliana receptor-type protein kinase LRK1 encoded by X95909.                                      | 9 | <i>Hel1_101a,b,c,d; Hel1_122a; Hel1_226a; Hel1_235a; Hel1_246a; Hel1_279a</i> |
| <a href="#">ABB03723.1</a>     | putative ribosomal protein [Sorghum bicolor].                                                                                                                                               | Ribosomal protein S5                                                                                                      | 1 | <i>Hel1_307a</i>                                                              |
| <a href="#">Q0DY59.2</a>       | RecName: Full=3-hydroxy-3-methylglutaryl-coenzyme A reductase 1; Short=HMG-CoA reductase 1.Oryza sativa Japonica Group                                                                      | HMG-CoA reductase 1                                                                                                       | 1 | <i>Hel1_291a(5'_2)</i>                                                        |
| <a href="#">NP_001030921.1</a> | RNA binding [Arabidopsis thaliana].                                                                                                                                                         | similar to zinc finger (CCCH-type) family protein / RNA recognition motif (RRM)-containing protein [Arabidopsis thaliana] | 1 | <i>Hel1_276a(3'_1)</i>                                                        |
| <a href="#">ABO32298.1</a>     | S-adenosylmethionine decarboxylase [Saccharum officinarum].                                                                                                                                 | gene="SAMDC"                                                                                                              | 1 | <i>Hel1_253a</i>                                                              |
| <a href="#">NP_172333.1</a>    | thioredoxin family protein [Arabidopsis thaliana].                                                                                                                                          | Identical to Thioredoxin-like 1 [Arabidopsis thaliana]                                                                    | 1 | <i>Hel1_222a</i>                                                              |
| <a href="#">ABX82685.1</a>     | transposase [Zea mays subsp. parviglumis].                                                                                                                                                  | transposase                                                                                                               | 1 | <i>Hel1_225a(5'_1)</i>                                                        |

|                            |                            |                                       |   |                                                  |
|----------------------------|----------------------------|---------------------------------------|---|--------------------------------------------------|
| <a href="#">ABE77201.1</a> | unknown [Sorghum bicolor]. | expressed protein, Myb/SANT domain    | 1 | <i>Hel1_204a</i>                                 |
| <a href="#">ACF84625.1</a> | unknown [Zea mays]         | unknown [Zea mays]                    | 3 | <i>Hel1_100a,b,c</i>                             |
| <a href="#">ACF87439.1</a> | unknown [Zea mays]         | unknown [Zea mays]                    | 1 | <i>Hel1_100d</i>                                 |
| <a href="#">AAT39464.1</a> | unknown [Zea mays].        | similar to sorhum gene SB35P03.21 for |   |                                                  |
| <a href="#">AAV64202.1</a> | unknown [Zea mays].        | unknown protein encoded by AF466199   | 2 | <i>Hel1_124a; Hel1_279a</i>                      |
| <a href="#">ACF78445.1</a> | unknown [Zea mays].        | unknown [Zea mays].                   | 1 | <i>Hel1_124a</i>                                 |
| <a href="#">ACF78564.1</a> | unknown [Zea mays].        | unknown [Zea mays].                   | 1 | <i>Hel1_212a</i>                                 |
| <a href="#">ACF78648.1</a> | unknown [Zea mays].        | unknown                               | 1 | <i>Hel1_219a</i>                                 |
| <a href="#">ACF78732.1</a> | unknown [Zea mays].        | unknown [Zea mays].                   | 1 | <i>Hel1_126a</i>                                 |
| <a href="#">ACF79179.1</a> | unknown [Zea mays].        | unknown [Zea mays].                   | 1 | <i>Hel1_216a</i>                                 |
| <a href="#">ACF79333.1</a> | unknown [Zea mays].        | unknown [Zea mays].                   | 2 | <i>Hel1_103a,b</i>                               |
| <a href="#">ACF79640.1</a> | unknown [Zea mays].        | unknown [Zea mays].                   | 1 | <i>Hel1_258a</i>                                 |
| <a href="#">ACF80302.1</a> | unknown [Zea mays].        | unknown [Zea mays].                   | 2 | <i>Hel1_118a,b</i>                               |
| <a href="#">ACF80487.1</a> | unknown [Zea mays].        | unknown [Zea mays].                   | 1 | <i>Hel1_231a(5'_1)</i>                           |
| <a href="#">ACF81183.1</a> | unknown [Zea mays].        | unknown [Zea mays].                   | 1 | <i>Hel1_233a(3'_2)</i>                           |
| <a href="#">ACF81969.1</a> | unknown [Zea mays].        | unknown [Zea mays].                   | 1 | <i>Hel1_248a(3'_1)</i>                           |
| <a href="#">ACF81992.1</a> | unknown [Zea mays].        | unknown [Zea mays].                   | 1 | <i>Hel1_203a</i>                                 |
| <a href="#">ACF82193.1</a> | unknown [Zea mays].        | unknown [Zea mays].                   | 3 | <i>Hel1_122a; Hel1_246a;</i><br><i>Hel1_279a</i> |
| <a href="#">ACF82242.1</a> | unknown [Zea mays].        | unknown [Zea mays].                   | 2 | <i>Hel1_223a; Hel1_231a(5'_1)</i>                |
| <a href="#">ACF82358.1</a> | unknown [Zea mays].        | unknown [Zea mays].                   | 1 | <i>Hel1_126a</i>                                 |
| <a href="#">ACF82809.1</a> | unknown [Zea mays].        | unknown [Zea mays].                   | 1 | <i>Hel1_220a</i>                                 |
| <a href="#">ACF82936.1</a> | unknown [Zea mays].        | unknown [Zea mays].                   | 1 | <i>Hel1_124a</i>                                 |
| <a href="#">ACF83068.1</a> | unknown [Zea mays].        | unknown [Zea mays].                   | 2 | <i>Hel1_119a,b</i>                               |
| <a href="#">ACF83223.1</a> | unknown [Zea mays].        | unknown [Zea mays].                   | 1 | <i>Hel1_122a</i>                                 |
| <a href="#">ACF84400.1</a> | unknown [Zea mays].        | unknown [Zea mays].                   | 1 | <i>Hel1_200a</i>                                 |
| <a href="#">ACF84691.1</a> | unknown [Zea mays].        | unknown [Zea mays].                   | 1 | <i>Hel1_209a</i>                                 |
| <a href="#">ACF85427.1</a> | unknown [Zea mays].        | unknown [Zea mays].                   | 1 | <i>Hel1_291a(5'_1)</i>                           |
| <a href="#">ACF85966.1</a> | unknown [Zea mays].        | unknown [Zea mays].                   | 1 | <i>Hel1_297a(5'_2)</i>                           |
| <a href="#">ACF86951.1</a> | unknown [Zea mays].        | unknown [Zea mays].                   | 1 | <i>Hel1_300a</i>                                 |
| <a href="#">ACF87360.1</a> | unknown [Zea mays].        | unknown [Zea mays].                   | 1 | <i>Hel1_263a</i>                                 |
| <a href="#">ACF87373.1</a> | unknown [Zea mays].        | unknown [Zea mays].                   | 1 | <i>Hel1_283a</i>                                 |
| <a href="#">ACF87484.1</a> | unknown [Zea mays].        | unknown [Zea mays].                   | 2 | <i>Hel1_120a,b</i>                               |
|                            |                            |                                       | 1 | <i>Hel1_258a</i>                                 |

|                             |                                                                                            |                                                                                            |   |                        |
|-----------------------------|--------------------------------------------------------------------------------------------|--------------------------------------------------------------------------------------------|---|------------------------|
| <a href="#">ACF87608.1</a>  | unknown [Zea mays].                                                                        | unknown [Zea mays].                                                                        | 3 | <i>Hel1_116a,b,c</i>   |
| <a href="#">ACF87655.1</a>  | unknown [Zea mays].                                                                        | unknown [Zea mays].                                                                        | 2 | <i>Hel1_109a,b</i>     |
| <a href="#">ACF87823.1</a>  | unknown [Zea mays].                                                                        | unknown [Zea mays].                                                                        | 1 | <i>Hel1_214a</i>       |
| <a href="#">ACF88064.1</a>  | unknown [Zea mays].                                                                        | unknown [Zea mays].                                                                        | 1 | <i>Hel1_280a</i>       |
| <a href="#">ACG24331.1</a>  | unknown [Zea mays].                                                                        | unknown [Zea mays].                                                                        | 1 | <i>Hel1_285a(3'_1)</i> |
| <a href="#">ACG27901.1</a>  | unknown [Zea mays].                                                                        | unknown [Zea mays].                                                                        | 1 | <i>Hel1_276a(3'_1)</i> |
| <a href="#">ACG28452.1</a>  | unknown [Zea mays].                                                                        | unknown [Zea mays].                                                                        | 1 | <i>Hel1_284a</i>       |
| <a href="#">ACG30698.1</a>  | unknown [Zea mays].                                                                        | unknown [Zea mays].                                                                        | 1 | <i>Hel1_297a(5'_2)</i> |
| <a href="#">ACG32109.1</a>  | unknown [Zea mays].                                                                        | unknown [Zea mays].                                                                        | 1 | <i>Hel1_300a</i>       |
| <a href="#">ACG39196.1</a>  | unknown [Zea mays].                                                                        | unknown [Zea mays].                                                                        | 1 | <i>Hel1_301a</i>       |
| <a href="#">ACG40603.1</a>  | unknown [Zea mays].                                                                        | unknown [Zea mays].                                                                        | 1 | <i>Hel1_297a(5'_2)</i> |
| <a href="#">ACG46039.1</a>  | unknown [Zea mays].                                                                        | unknown [Zea mays].                                                                        | 1 | <i>Hel1_284a</i>       |
| <a href="#">ACG46552.1</a>  | unknown [Zea mays].                                                                        | unknown [Zea mays].                                                                        | 1 | <i>Hel1_285a(3'_1)</i> |
| <a href="#">ABF98825.1</a>  | WD-40 repeat family protein, putative, expressed [Oryza sativa (japonica cultivar-group)]. | WD-40 repeat family protein, putative, expressed [Oryza sativa (japonica cultivar-group)]. | 1 | <i>Hel1_124a</i>       |
| <a href="#">NP_176362.3</a> | zinc ion binding [Arabidopsis thaliana].                                                   | similar to zinc finger (FYVE type) family protein [Arabidopsis]                            | 1 | <i>Hel1_216a</i>       |

\* The abundant *Hel1\_105* and *Hel1\_106* subfamilies are highlighted in green and yellow, respectively.
